# Supplementary material for: Importance of living arrangements and coparenting quality for young children’s mental health after parental divorce: a cross-sectional parental survey
Source: PubMed Central journal article supplement — BMJ Paediatr Open. 2021 May 26;5(1):e000657. doi: 10.1136/bmjpo-2020-000657 (PMC8160159; doi:10.1136/bmjpo-2020-000657), 2021-05-26

# BMJ Paediatrics Open

BMJ Paediatrics Open is committed to open peer review. As part of this commitment we make the peer review history of every article we publish publicly available.

When an article is published we post the peer reviewers' comments and the authors' responses online. We also post the versions of the paper that were used during peer review. These are the versions that the peer review comments apply to.

The versions of the paper that follow are the versions that were submitted during the peer review process. They are not the versions of record or the final published versions. They should not be cited or distributed as the published version of this manuscript.

BMJ Paediatrics Open is an open access journal and the full, final, typeset and author-corrected version of record of the manuscript is available on our site with no access controls, subscription charges or pay-per-view fees (<http://bmjpaedsopen.bmj.com>).

If you have any questions on BMJ Paediatrics Open's open peer review process please email [info.bmjpo@bmj.com](mailto:info.bmjpo@bmj.com)

# BMJ Paediatrics Open

## Mental health of young children after parental separation: the importance of living arrangements and coparenting quality.

|                               |                                                                                                                                                                                                                                                                                                                                                                  |
|-------------------------------|------------------------------------------------------------------------------------------------------------------------------------------------------------------------------------------------------------------------------------------------------------------------------------------------------------------------------------------------------------------|
| Journal:                      | <i>BMJ Paediatrics Open</i>                                                                                                                                                                                                                                                                                                                                      |
| Manuscript ID                 | bmjpo-2020-000657                                                                                                                                                                                                                                                                                                                                                |
| Article Type:                 | Original research                                                                                                                                                                                                                                                                                                                                                |
| Date Submitted by the Author: | 07-May-2020                                                                                                                                                                                                                                                                                                                                                      |
| Complete List of Authors:     | Bergstrom, Malin; Centre for Health Equity Studies<br>Salari, Raziye; Uppsala University, Department of public health and caring sciences<br>Hjern, Anders; Centre for Health Equity Studies, ;<br>Hognäs, Robin; Stockholm University, Public Health<br>Bergqvist, Kersti; Centre for Health Equity Studies<br>Fransson, Emma; Centre for Health Equity Studies |
| Keywords:                     | Child Psychology, Comm Child Health                                                                                                                                                                                                                                                                                                                              |
|                               |                                                                                                                                                                                                                                                                                                                                                                  |

SCHOLARONE™  
Manuscripts

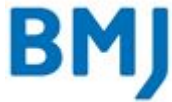

I, the Submitting Author has the right to grant and does grant on behalf of all authors of the Work (as defined in the below author licence), an exclusive licence and/or a non-exclusive licence for contributions from authors who are: i) UK Crown employees; ii) where BMJ has agreed a CC-BY licence shall apply, and/or iii) in accordance with the terms applicable for US Federal Government officers or employees acting as part of their official duties; on a worldwide, perpetual, irrevocable, royalty-free basis to BMJ Publishing Group Ltd ("BMJ") its licensees and where the relevant Journal is co-owned by BMJ to the co-owners of the Journal, to publish the Work in this journal and any other BMJ products and to exploit all rights, as set out in our [licence](#).

The Submitting Author accepts and understands that any supply made under these terms is made by BMJ to the Submitting Author unless you are acting as an employee on behalf of your employer or a postgraduate student of an affiliated institution which is paying any applicable article publishing charge ("APC") for Open Access articles. Where the Submitting Author wishes to make the Work available on an Open Access basis (and intends to pay the relevant APC), the terms of reuse of such Open Access shall be governed by a Creative Commons licence – details of these licences and which [Creative Commons](#) licence will apply to this Work are set out in our licence referred to above.

Other than as permitted in any relevant BMJ Author's Self Archiving Policies, I confirm this Work has not been accepted for publication elsewhere, is not being considered for publication elsewhere and does not duplicate material already published. I confirm all authors consent to publication of this Work and authorise the granting of this licence.

1  
2  
3  
4 **Mental health of young children after parental separation: the importance of**  
5  
6  
7 **living arrangements and coparenting quality**  
8  
9

10  
11  
12  
13 Malin Bergström\*<sup>1,2</sup>, Raziye Salari\*<sup>3</sup>, Anders Hjern<sup>1,2</sup>, Robin Högnäs<sup>1</sup>,

14  
15  
16 Kersti Bergqvist<sup>1</sup>, Emma Fransson<sup>1,4</sup>

17  
18 \*Equal contribution  
19

20  
21  
22  
23 <sup>1</sup> Centre for Health Equity Studies, Stockholm University/ Karolinska Institutet, 106 91

24  
25  
26 Stockholm, Sweden  
27

28 <sup>2</sup> Clinical Epidemiology, Department of Medicine, Karolinska Institutet, 171 77 Stockholm,

29  
30  
31 Sweden  
32

33 <sup>3</sup> Child Health and Parenting (CHAP), Department of Public Health and Caring Sciences, Uppsala

34  
35  
36 University, Uppsala, Sweden  
37

38 <sup>4</sup> Department of Women's and Children's Health, Uppsala University, Uppsala, Sweden  
39

40  
41  
42  
43 Corresponding author: Correspondence concerning this article should be addressed to  
44  
45 Anders Hjern, Centre for Health Equity Studies; Department of public health science, Stockholm  
46  
47 University/ Karolinska Institutet, 106 91 Stockholm, Sweden. Email: anders.hjern@chess.su.se.  
48  
49  
50  
51  
52  
53  
54  
55  
56  
57

# Mental health of young children after parental separation: the importance of living arrangements and coparenting quality

## ABSTRACT

**Background.** Parental separation has been associated with adverse child mental health outcomes in the literature. For school aged children, joint physical custody (JPC) i.e. spending equal time in both parents' homes after a divorce, has been associated with better health and wellbeing than single care arrangements. Preschool children's wellbeing in JPC is less studied. The aim of this study was to investigate the association of living arrangements and coparenting quality with mental health in preschool children after parental separation.

**Methods.** This cross-sectional population-based study includes 12,845 3-year-old children in Sweden. Mental health was measured by parental reports of the Strength and Difficulties Questionnaire (SDQ) and coparenting quality with a four item scale. The living arrangements of the 642 children in non-intact families were categorized into JPC, mostly with one parent and only with one parent.

**Results.** Linear regression models, adjusted for socio-demographic confounders, showed an association between increased mental health problems and living mostly with, and only with one parent ( $B=1.21$ ;  $CI=0.54-1.89$ , and  $B=1.01$ ;  $CI=0.34-1.67$  respectively), while children in JPC versus intact families did not differ significantly in terms of mental health problems ( $B=0.09$ ;  $CI=-0.37-0.55$ ). Low coparenting quality was strongly associated with child

1  
2  
3 mental health problems (B=2.05; CI=1.86-2.23). After adjusting the analysis for coparenting  
4  
5 quality, differences in child mental health between living arrangements were minimal.  
6  
7

8 **Conclusions.** This study suggests that coparenting quality, and not living arrangements  
9  
10 per se, is a key determinant of mental health in preschool children in general and thus should  
11  
12 be targeted in preventive interventions.  
13  
14

15 **Key words.** Children, Divorce, Joint physical custody, Coparenting, Parental separation,  
16  
17 Psychological problems  
18  
19  
20  
21  
22

#### 23 **WHAT IS KNOWN ABOUT THIS SUBJECT:**

- 24 • Parental separation is an increasingly common experience of children in high-income countries.
- 25 • Joint physical custody, where children share their time about equally between their parents',  
26  
27 has become an increasingly common living arrangement after parental separation.  
28  
29
- 30 • There is a dearth of empirical studies of the consequences for mental health of joint physical  
31  
32 custody in the preschool age.  
33  
34  
35  
36  
37  
38  
39

#### 40 **WHAT THIS ADDS:**

- 41 • We found similar mental health in children in joint physical custody and intact families,  
42  
43 while children living with one parent had more mental health problems.  
44  
45
- 46 • Once we accounted for coparenting quality, child mental health in the diverse living  
47  
48 arrangements was very similar.  
49  
50
- 51 • Our results imply that coparenting could be targeted with interventions in families with  
52  
53 young children, regardless of family type.  
54  
55  
56  
57  
58  
59  
60

1  
2  
3  
4  
5  
6  
7  
8  
9  
10  
11  
12  
13  
14  
15  
16  
17  
18  
19  
20  
21  
22  
23  
24  
25  
26  
27  
28  
29  
30  
31  
32  
33  
34  
35  
36  
37  
38  
39  
40  
41  
42  
43  
44  
45  
46  
47  
48  
49  
50  
51  
52  
53  
54  
55  
56  
57  
58  
59  
60

Confidential: For Review Only

## INTRODUCTION

Around 35% of Swedish children experience parental separation before reaching the age of 18 years, and previous studies have shown that the experience of parental separation is associated with adverse mental health outcomes in the short as well as the long term (1, 2). During recent decades, parenting norms have changed in the Nordic countries, and sole custody among mothers has become less common than joint physical custody (JPC), where children share their time about equally between their parents' respective homes (3-5). In Sweden, approximately 10% of all school children live in JPC arrangements (3). JPC is also increasingly common even in countries with more conservative family values such as Germany and France (6, 7).

### **Living arrangements and child wellbeing**

A growing body of research has shown that living arrangements and contact with both parents is associated with post-divorce child wellbeing (8). Most studies in the literature have suggested that school-aged children and adolescents in JPC fare better on several outcomes compared to children in single-parent arrangements (9, 10).

JPC arrangements among preschool children has been much less studied. In a recent Swedish study (11), 3- to 5-year-olds who lived in JPC had fewer mental health problems compared to those living in single-parent arrangements. Similar findings were reported in a Nordic study on children aged 2-9 years (12). Studies in contexts outside of the Nordic countries have shown similar but somewhat more diverse results (13-15). Pruett, Ebling (14) found that overnight stays with the second parent were associated with advantages in social functioning and fewer psychological problems among girls. However, McIntosh and Smyth (13) found that generally the 2- to 3-year-olds who spent 35% or more time with their second parent, experienced more problems compared to their peers who has less contact with their second parent. Tornello, Emery (15) did not find any association between custody



1  
2  
3 arrangements in socially and economically disadvantaged families and psychological problems at age 3,  
4  
5 but nonetheless found fewer problems among 5-year-old children who had JPC versus single-parent  
6  
7 arrangements at age 3.  
8  
9

### 10 **Coparenting quality and child wellbeing**

11  
12  
13 High-quality coparenting has been found to contribute to a positive emotional family climate,  
14  
15 and to affect child mental health and social adjustment positively (16). Children whose parents work  
16  
17 well together in childrearing issues are typically better off during early childhood, adolescence, and  
18  
19 adulthood (17). The association between coparenting quality and child wellbeing outcomes seems to be  
20  
21 even stronger than other characteristics of parental relationships, such as intimacy and love (18).  
22  
23

24  
25 The lower levels of health and wellbeing observed among children with separated parents may,  
26  
27 thus, hypothetically be linked to their parents' ability to amiably share the responsibilities of childrearing  
28  
29 (19). It is important to highlight that coparenting quality is a broader construct than parental conflict.  
30  
31 Not only does coparenting include positive measures, it is conceptually distinct from the quality of  
32  
33 parental relationships because it directly involves the children (17).  
34  
35

36  
37 The aim of this study was to investigate whether mental health in 3-year-old children is  
38  
39 associated with their living arrangements after a parental separation, and whether parental coparenting  
40  
41 quality moderates this association.  
42  
43  
44  
45  
46  
47  
48  
49  
50  
51  
52  
53  
54  
55  
56  
57  
58  
59  
60

## METHODS

### Study population

The population of this study was sampled from a total population of 19,294 children in a defined geographical area in the Stockholm country, who were invited to a routine visit at the age of three years by the regional Preventive Child Health Care (PCHC) from December 2015 to May 2018. The PCHC is funded by regional taxes and their services are offered to all children who reside in the county free of charge. In the invitation letter, parents were informed about the study and that the survey would be used to individualise the visit at the PCHC. The letter included a web-link to the survey which was only available in Swedish. The study was approved by the Regional Ethical Review Board in Stockholm (Dnr 2015-228631).

In total, 13,493 surveys were submitted. Of these, 112 surveys were excluded because the participants had reported that they were the sole parent of the child since childbirth and 32 surveys were excluded because parents had completed the survey twice for the same child. We also excluded 504 surveys because they were completed by someone other than a parent or because information was missing on the main variables of interest. Thus, 12,845 children were included in the study, equivalent to a participation rate of 64.7% of the total population of 3-year-olds in the area.

### Patient and Public involvement statement

Parents to children in the child health services in Stockholm were involved in the piloting phase of this study, where they provided feedback on questionnaires and the procedure in qualitative interviews and in a quantitative evaluation in writing. We do not plan to have parents involved in the dissemination of the results of the study.

## Procedure

The survey included questions on sociodemographic background, children's development, behaviours and symptoms, parents' worries, and coparenting quality. Parents were encouraged to complete the survey together.

## Measures

**Outcome measure.** The main outcome in the study was based on parental report of the Swedish version of the Strengths and Difficulties Questionnaire (SDQ) which has been successfully validated for preschool aged children (20). We used the total sum of scores from the four symptom subscales (SDQ Total Difficulties) ranging from 0 to 40.

**Living arrangements.** Living arrangement groups were based on parents' answers to the question "What does the child's family look like? The child lives with...". The options were: (a) intact family, (b) joint physical custody (about 50/50 in each parent's home), (c) living mostly with mother/father (collapsed here to living mostly with one parent), and (d) living only with mother/father (collapsed here to living only with one parent).

**Coparenting quality.** Coparenting was measured using a four-item scale inspired by the coparenting scale posited by McHale and Kuersten-Hogan (21). Parents were asked about their ability to cooperate, support each other, and confide in/trust each other, and the extent to which they experienced conflict related to their children. Items were rated on a 5-point scale from 1 (disagree completely) to 5 (agree completely). Higher scores indicated better coparenting. The scale showed good internal consistency (Cronbach's alpha = 0.79). Confirmatory factor analysis revealed an acceptable fit for the one factor model: comparative fit index (CFI) = 0.99; Tucker-Lewis index (TLI) = 0.98; root mean square error of approximation (RMSEA) = 0.066 (90% confidence interval = 0.056 – 0.076).

1  
2  
3 The coparenting scale was not normally distributed. Thus, for the regression analyses, we used a  
4  
5 dichotomization with the 20<sup>th</sup> percentile as the cut-off. Coparenting quality of 16 and below was  
6  
7 considered low while coparenting quality of 17 and above was considered high.  
8  
9

10 **Background data on children and parents.** We used the following background characteristics:  
11  
12 child gender (girl/boy); responding parent (categorised as mother/father/both, where both included a  
13  
14 few cases of same-sex parents); parents' age (categorized as 24 and younger/25 to 34/35 to 44/45 and  
15  
16 older/not reported); parents' highest level of education (less than high school/high school/university  
17  
18 (less than 3 years)/university (3 years or more)/not reported); and parent country of birth (reported for  
19  
20 one or two parents and grouped as only Sweden/Sweden and other/only other/not reported).  
21  
22  
23  
24

## 25 **Statistical analyses**

26  
27 Imputation was used for the coparenting scale if only one item was missing, and for SDQ if only  
28  
29 one or two items per subscale were missing. We imputed the mean of the scale/subscale for the missing  
30  
31 item(s).  
32  
33

34 Hierarchical regression models were estimated in three steps with the SDQ total score as the  
35  
36 outcome and living arrangements as the exposure variable. Model 1 adjusted for child gender and  
37  
38 whether the survey was filled in by the mother, father or both. Model 2 added parents' age, parental  
39  
40 education and parent country of birth. In the fully adjusted Model 3, coparenting quality (high/low) was  
41  
42 added to Model 2.  
43  
44

45 To investigate the possibility that coparenting quality moderated the association between family  
46  
47 type and the SDQ total score for children, we estimated hierarchical regression models interacting  
48  
49 family types and coparenting quality (dichotomised into high and low levels).  
50  
51  
52  
53  
54  
55  
56  
57  
58  
59  
60

## RESULTS

### Background characteristics

Characteristics of children and parents are presented in Table 1. About 95% of the 3-year-olds lived with both parents, in intact families. Children in equal JPC constituted 2.6% of the total sample, while 1.2% of the children lived mostly with one parent and as many lived only with one parent. The sample included slightly more boys than girls in all family types. In intact families, most parents completed the survey together, while in other family types, mothers often completed the survey alone.

A university-level education of at least three years for mothers and fathers was more common in intact and JPC families compared with the other types of living arrangements, and these parents were also older. Parents of children living with only one parent (versus other living arrangements) were more likely to be born outside of Sweden.

### Mental health problems and coparenting

Mental health problems according to SDQ for children in different family types are reported in Table 2. Fewer problems were reported for children in intact families followed by children in JPC. Children living mostly or only with one parent had more mental health problems. The highest level of coparenting quality was reported by parents in intact families and the lowest by parents of children living with only one parent.

The living arrangement groups were then divided into high-quality and low-quality coparenting for each family type. Fewer mental health problems were reported for children with parents with high-quality coparenting (see Table 2).

### Multivariate modelling

Table 3 shows the results from linear regression models, which suggest that children living mostly or only with one parent, compared with those in intact families, had more mental health problems. However, children in JPC arrangements were not significantly different from those in intact families in terms of their mental health. When sociodemographic variables were adjusted for, in Model 2, the differences between those living only and mostly with one parent and those in intact families were largely attenuated. Coefficients remained significant, however, indicating that only some of the differences were explained by the background characteristics. In Model 3, after including coparenting, differences in child mental health based on any living arrangements were no longer significant, while low (versus high) coparenting quality was associated strongly with child mental health problems.

Next, to examine whether coparenting moderated the association between living arrangements and child mental health, we estimated the two interaction models shown in Table 4. With intact families with high coparenting quality as the reference group, the results suggest that children in all family types with low coparenting quality had more mental health problems compared to intact families with high coparenting. This also was true for children living mostly or only with one parent with high coparenting quality. After adjusting for all sociodemographic variables (Model 2), the magnitude of the associations decreased, but remained significant (with the exception of children living mostly with one parent with high coparenting quality). The largest effect sizes in the fully adjusted model were for children living mostly with one parent with low coparenting quality closely followed by those in intact families with low coparenting.

## DISCUSSION

This cross-sectional study of 12,485 3-year-olds in Stockholm, demonstrated very similar mental health outcomes in children in JPC after parental separation compared with children in intact families, while children living mostly and only with one parent had more mental health problems, net of sociodemographic characteristics. These findings are consistent with another Swedish cohort of 3- to 5-year-olds (11) and studies on older children in Nordic countries (e.g., 12, 22, 23). The addition of coparenting quality in the analyses, however, changed the picture of how children's mental health is related to family type.

### The findings in relation to coparenting quality

Once we accounted for coparenting quality, there were nothing but minimal differences in child mental health in different family arrangements. Schoppe-Sullivan & Weldon (24) have previously shown that coparenting quality may moderate the association between children's socioemotional development (such as self-control) and later externalizing behaviours. The impact of parental conflict on children's wellbeing is well established in the literature (19). A systematic review has, previously, concluded that coparenting is a key mechanism within the family system for child mental health outcomes following divorce (25). The results of our study suggest that coparenting quality is a determinant of children's mental health symptoms not only among children with separated or divorced parents, but also for those in intact families. Our study, hence, extends this literature by providing evidence that coparenting quality may be more important for young children's mental health than their family form per se.

Coparenting quality differed between parents in different post-divorce family types and among those still cohabiting, which may explain differences in how children fare across family forms. Indeed, prior research has found similar patterns related to parental conflict. In a longitudinal Swedish study, adults who had grown up in intact families characterized by serious disagreement, reported the lowest

1  
2  
3 level of psychological wellbeing, followed by those who had experienced parental conflict *and* parental  
4 divorce (26). Similarly, another Swedish study found that children who grew up with divorced parents  
5 had poorer psychological health as young adults, but parental conflict and economic hardship during  
6 childhood attenuated the association (27).  
7  
8  
9  
10

11 For children living with only one parent, there was still an association (though weaker) between  
12 family type and child mental health also in the group with high coparenting quality. It seems plausible  
13 that coparenting quality affects children less when one parent is the primary care giver and the need for  
14 cooperation between the parents is, thus, limited. Parenting quality of the primary care giver may, for  
15 these children, be of greater importance.  
16  
17  
18  
19  
20  
21  
22

23 Currently, parenting interventions mainly focus on improving the quality of parenting children  
24 receive and primarily target mothers (28). Unfortunately, positive effects of such programs have not  
25 been extended to coparenting quality (29). Our results suggest that coparenting skills may be an  
26 important and distinct dimension that should be given more attention in parenting interventions and  
27 that such programs should be evaluated in terms of their impact on child wellbeing and mental health  
28 (30, 31).  
29  
30  
31  
32  
33  
34  
35

36 We previously discussed whether children's wellbeing related to custody arrangements may be  
37 explained by socioeconomic status, by an increased closeness to the father in JPC, or by whether  
38 children experience a loss of social and economic resources. Earlier studies show that although these  
39 factors contributed to children's wellbeing, adjusting for them did not eliminate the differences in  
40 wellbeing between children living in different family types (2, 9, 11, 12, 23). By grouping family types  
41 according to coparenting quality, we may capture a large proportion of the unmeasured variance; these  
42 are differences between groups that have been unexplained in previous studies. The current study did  
43 not, however, address the potential interaction between good/poor parenting quality and children's  
44 temperaments. Schoppe-Sullivan & Weldon (24) showed that children with low self-control (low on the  
45  
46  
47  
48  
49  
50  
51  
52  
53  
54  
55  
56  
57  
58  
59  
60



1  
2  
3 effortful control temperament scale) were helped by a supporting coparenting environment. In this  
4  
5 context, the risk of negative behaviours that typically follow such temperament was attenuated.  
6  
7

### 8 9 **Methodological considerations**

10  
11 Compared to earlier studies examining JPC among very young children, this study has  
12  
13 considerable advantages. First, the size of our sample of children in this living arrangement by far  
14  
15 exceeds that of earlier studies. Second, these children live in about equal JPC, whereas JPC in other  
16  
17 studies may be based on overnights or unequal distribution of time between the parents' homes.  
18  
19 Furthermore, the inclusion of the coparenting measure contributes to the explanation of children's  
20  
21 psychological health in different family types. We do, however, acknowledge that our assessment of  
22  
23 coparenting quality was a modified tool of four items, inspired by McHale et al. (2000) and adapted to a  
24  
25 community health care setting. One issue with our measure is that we may not capture the whole  
26  
27 variance, as most families score rather high on the measure, and thus the measure needs further  
28  
29 validation. Even so, factor analysis suggested that the internal validity was good. Third, more parents in  
30  
31 the intact family settings assessed coparenting quality together, whereas one parent more often  
32  
33 assessed coparenting in the non-intact families. To address this issue, we adjusted for whether the  
34  
35 respondent was the father or mother or both parents. Finally, we successfully recruited a high  
36  
37 percentage of the children in the general population to the study (65%), though we were not able to  
38  
39 examine the differences between those who did and did not participate in the study.  
40  
41  
42  
43  
44

45  
46 It is important to note that the relation between children's mental health problems and  
47  
48 coparenting quality is not causal. Having a toddler with behavioural problems may impact the  
49  
50 coparenting relationship and parents' perceptions of their children's mental health may be influenced  
51  
52 by their common abilities to handle the child. Further longitudinal studies are needed to determine the  
53  
54 direction of this relation. Also, regarding causality, there is no information in this study about what  
55  
56  
57  
58  
59  
60

1  
2  
3 factors lead to better or worse coparenting quality. Sharing parental responsibilities has previously been  
4 shown to be associated with reduced workload (32), more time for leisure activities (33), and improved  
5 communication between parents (32, 34).  
6  
7  
8  
9

10 The results of this study show considerable differences in parental education between living  
11 arrangements, with two thirds of JPC mothers versus only one third in the “only with one parent”  
12 category having a university degree. This confirms assumptions of socioeconomic selection into living  
13 arrangements. It seems probable that other selection factors that were not included in our analysis,  
14 such as parental mental health and addictive problems, may have a similar distribution, thus causing  
15 residual confounding in the comparison between living arrangements.  
16  
17  
18  
19  
20  
21  
22  
23  
24

### 25 **Implications**

26 This study does not support claims that JPC is psychologically harmful for preschool children in general.  
27  
28 Our results, rather, indicate that the promotion of coparenting quality should be emphasized in policy  
29 and prevention of mental health for young children living with both parents as well as after parental  
30 separation. For children living with one parent only, interventions that focus on parenting skills and  
31 positive parenting behaviours should be given priority.  
32  
33  
34  
35  
36  
37  
38  
39

### 40 **Conclusion**

41 For the first time, we have shown that coparenting may explain a large part of the differences in  
42 child psychological problems between young children in different living arrangements, and explains  
43 *more than* the actual living arrangement. This study suggests that this construct is of importance for  
44 early mental health problems, particularly because coparenting quality is a health determinant that  
45 clinicians and social workers can target with interventions, regardless of the family situation.  
46  
47  
48  
49  
50  
51  
52  
53  
54  
55  
56  
57

**FUNDING**

This research was funded by The Wallenberg foundation (AH) and Forte (MB and EF; Dnr 2014-0843).

**CONFLICTS OF INTEREST**

None declared.

**CONTRIBUTORS**

MB, EF and AH initiated and funded this study and created the framework for the data collection and analysis together with KB. KB supervised the data collection and prepared the collected data for analysis. RS designed and performed all statistical analyses and wrote the first draft of the manuscript together with MB. All authors revised the draft and have approved of the final version.

**ACKNOWLEDGEMENTS**

Thanks to nurses at the Stockholm child health care centres and to the families that participated in this research project.

## References

1. Weitoft GR, Hjern A, Haglund B, Rosén M. Mortality, severe morbidity, and injury in children living with single parents in Sweden: a population-based study. *The Lancet*. 2003;361(9354):289-95.
2. Bergström M, Fransson E, Modin B, Berlin M, Gustafsson PA, Hjern A. Fifty moves a year: is there an association between joint physical custody and psychosomatic problems in children? *J Epidemiol Community Health*. 2015;69(8):769-74.
3. Swedish Government Official Report. 2011:51 Fortsatt föräldrar - om ansvar, ekonomi och samarbete för barnets skull. [Continuous parenthood: about responsibilities, economy and cooperation for the sake of the child]. Statens offentliga utredningar. Stockholm: Fritze; 2011.
4. Kitterød RH, Wiik KA. Shared Residence Among Parents Living Apart in Norway. *Family Court Review*. 2017;55(4):556-71.
5. Ottosen HM, Stage S. Delebørn i tal. En analyse af skilsmissebørns samvær baseret på SFI's børneforløbsundersøgelse [Split children in numbers. An analysis of divorce child custody cases based on SFI's child development study]. SFI rapport - Det Nationale Forskningscenter for Velfærd; 2012.
6. Institut für Demoskopie Allensbach. Getrennt gemeinsam erziehen Befragung von Trennungseltern im Auftrag des BMFSFJ [Parenting together separately: A survey of separated parents for the BMFSFJ]. Allensbach on Lake Constance: Author; 2017.
7. Institut National de la Statistique et des Études Économiques (INSEE). Structure des familles avec enfants [Structure of families with children]. 2015.

- 1  
2  
3 8. Bastaits K, Mortelmans D. Parenting as mediator between post-divorce family structure  
4 and children's well-being. *J Child Fam Stud*. 2016;25(7):2178-88.  
5  
6
- 7  
8 9. Bergström M, Modin B, Fransson E, Rajmil L, Berlin M, Gustafsson PA, et al. Living in two  
9 homes-a Swedish national survey of wellbeing in 12 and 15 year olds with joint physical  
10 custody. *BMC Public Health*. 2013;13(1):868.  
11  
12
- 13 10. Nielsen L. Shared Physical Custody: Summary of 40 Studies on Outcomes for Children. *J*  
14  
15  
16  
17  
18  
19  
20  
21  
22  
23  
24  
25  
26  
27  
28  
29  
30  
31  
32  
33  
34  
35  
36  
37  
38  
39  
40  
41  
42  
43  
44  
45  
46  
47  
48  
49  
50  
51  
52  
53  
54  
55  
56  
57  
58  
59  
60  
10. Nielsen L. Shared Physical Custody: Summary of 40 Studies on Outcomes for Children. *J*  
Divorce Remarriage. 2014;55(8):613-35.
11. Bergström M, Fransson E, Fabian H, Hjern A, Sarkadi A, Salari R. Preschool children living  
in joint physical custody arrangements show less psychological symptoms than those living  
mostly or only with one parent. *Acta Paediatr*. 2018;107(2):294-300.
12. Bergström M, Fransson E, Wells MB, Köhler L, Hjern A. Children with two homes:  
Psychological problems in relation to living arrangements in Nordic 2- to 9-year-olds. *Scand J*  
*Public Health*. 2019;47(2):137-45.
13. McIntosh J, Smyth B, Kelahar M, Wells Y, Long C. Post-separation parenting  
arrangements and developmental outcomes for infants and children. Collected reports. Three  
reports prepared for the Australian Government Attorney-General's Department, Canberra.  
2010.
14. Pruett MK, Ebling R, Insabella G. Critical aspects of parenting plans for young children:  
Interjecting data into the debate about overnights. *Family Court Review*. 2004;42(1):39-59.
15. Tornello SL, Emery R, Rowen J, Potter D, Ocker B, Xu YS. Overnight custody  
arrangements, attachment, and adjustment among very young children. *J Marriage Fam*.  
2013;75(4):871-85.

- 1  
2  
3 16. Feinberg ME. Coparenting and the Transition to Parenthood: A Framework for  
4  
5 Prevention. *Clin Child Fam Psychol Rev*. 2002;5(3):173-95.  
6  
7
- 8 17. McHale JP, Irace K. Coparenting in diverse family systems. In: McHale JP, Lindahl KM,  
9  
10 editors. *Coparenting: A conceptual and clinical examination of family systems*. Washington, DC,  
11  
12 US: American Psychological Association; 2011.  
13
- 14 18. Frosch CA, Mangelsdorf SC. Marital behavior, parenting behavior, and multiple reports  
15  
16 of preschoolers' behavior problems: Mediation or moderation? *Dev Psychol*. 2001;37(4):502-  
17  
18 19.  
19
- 20 19. Amato PR. The consequences of divorce for adults and children. *J Marriage Fam*.  
21  
22 2000;62(4):1269-87.  
23
- 24 20. Dahlberg A, Ghaderi A, Sarkadi A, Salari R. SDQ in the hands of fathers and preschool  
25  
26 teachers—Psychometric properties in a non-clinical sample of 3–5-year-olds. *Child Psychiatry*  
27  
28 *Hum Dev*. 2019;50(1):132-41.  
29
- 30 21. McHale JP, Kuersten-Hogan R, Lauretti A, Rasmussen JL. Parental reports of coparenting  
31  
32 and observed coparenting behavior during the toddler period. *J Fam Psychol*. 2000;14(2):220-  
33  
34 36.  
35
- 36 22. Nilsen SA, Breivik K, Wold B, Bøe T. Divorce and Family Structure in Norway:  
37  
38 Associations With Adolescent Mental Health. *J Divorce Remarriage*. 2018;59(3):175-94.  
39
- 40 23. Bergström M, Fransson E, Hjern A, Köhler L, Wallby T. Mental health in Swedish children  
41  
42 living in joint physical custody and their parents' life satisfaction: A cross-sectional study. *Scand*  
43  
44 *J Psychol*. 2014;55(5):433-9.  
45  
46  
47  
48  
49  
50  
51  
52  
53  
54  
55  
56  
57  
58  
59  
60

- 1  
2  
3 24. Schoppe-Sullivan SJ, Weldon AH, Claire Cook J, Davis EF, Buckley CK. Coparenting  
4  
5 behavior moderates longitudinal relations between effortful control and preschool children's  
6  
7 externalizing behavior. *J Child Psychol Psychiatry*. 2009;50(6):698-706.  
8  
9  
10 25. Lamela D, Figueiredo B. Coparenting after marital dissolution and children's mental  
11  
12 health: a systematic review. *J Pediatr (Rio J)*. 2016;92:331-42.  
13  
14  
15 26. Gähler M. Self-reported Psychological Well-being among Adult Children of Divorce in  
16  
17 Sweden. *Acta Sociologica*. 1998;41(2-3):209-25.  
18  
19  
20 27. Gähler M, Garriga A. Has the Association Between Parental Divorce and Young Adults'  
21  
22 Psychological Problems Changed Over Time? Evidence From Sweden, 1968-2000. *J Fam Issues*.  
23  
24 2013;34(6):784-808.  
25  
26  
27 28. Panter-Brick C, Burgess A, Eggerman M, McAllister F, Pruett K, Leckman JF. Practitioner  
28  
29 review: Engaging fathers – recommendations for a game change in parenting interventions  
30  
31 based on a systematic review of the global evidence. *J Child Psychol Psychiatry*.  
32  
33 2014;55(11):1187-212.  
34  
35  
36 29. Pinquart M, Teubert D. Effects of parenting education with expectant and new parents:  
37  
38 a meta-analysis. *J Fam Psychol*. 2010;24(3):316-27.  
39  
40  
41 30. Feinberg ME, Kan ML. Establishing family foundations: intervention effects on  
42  
43 coparenting, parent/infant well-being, and parent-child relations. *J Fam Psychol*.  
44  
45 2008;22(2):253-63.  
46  
47  
48 31. Doss BD, Cicila LN, Hsueh AC, Morrison KR, Carhart K. A randomized controlled trial of  
49  
50 brief coparenting and relationship interventions during the transition to parenthood. *J Fam*  
51  
52 *Psychol*. 2014;28(4):483-94.  
53  
54  
55  
56  
57  
58  
59  
60

- 1  
2  
3 32. Emery RE. Developmental clinical psychology and psychiatry, Vol. 14. Marriage, divorce,  
4 and children's adjustment. 2nd ed. Thousand Oaks, CA, US: Sage Publications, Inc.; 1999.  
5  
6  
7  
8 33. Sodermans AK, Botterman S, Havermans N, Matthijs K. Involved fathers, liberated  
9 mothers? Joint physical custody and the subjective well-being of divorced parents. Soc Indic  
10 Res. 2015;122(1):257-77.  
11  
12  
13  
14  
15 34. Trinder L. Shared residence: A review of recent research evidence. Child and Family Law  
16 Quarterly. 2010;22(4):475-98.  
17  
18  
19  
20  
21  
22  
23  
24  
25  
26  
27  
28  
29  
30  
31  
32  
33  
34  
35  
36  
37  
38  
39  
40  
41  
42  
43  
44  
45  
46  
47  
48  
49  
50  
51  
52  
53  
54  
55  
56  
57  
58  
59  
60



Table 1. Characteristics of children and parents in different living arrangements

|                                           | Children's living arrangements |      |               |      |                        |      |                        |      |                      |      |
|-------------------------------------------|--------------------------------|------|---------------|------|------------------------|------|------------------------|------|----------------------|------|
|                                           | Total sample                   |      | Intact family |      | Joint physical custody |      | Mostly with one parent |      | Only with one parent |      |
|                                           | n                              | %    | n             | %    | n                      | %    | n                      | %    | n                    | %    |
| <b>Sociodemographic variables</b>         |                                |      |               |      |                        |      |                        |      |                      |      |
| <b>Child gender</b>                       |                                |      |               |      |                        |      |                        |      |                      |      |
| Girl                                      | 6213                           | 48.4 | 5897          | 48.3 | 163                    | 49.1 | 75                     | 49.7 | 78                   | 49.1 |
| Boy                                       | 6632                           | 51.6 | 6306          | 51.7 | 169                    | 50.9 | 76                     | 50.3 | 81                   | 50.9 |
| <b>Responding parent</b>                  |                                |      |               |      |                        |      |                        |      |                      |      |
| Female (mother)                           | 5315                           | 41.4 | 4848          | 39.7 | 199                    | 59.9 | 126                    | 83.4 | 142                  | 89.3 |
| Male (father)                             | 1052                           | 8.2  | 962           | 7.9  | 73                     | 22.0 | 12                     | 7.9  | 5                    | 3.1  |
| Two parents together <sup>a</sup>         | 6478                           | 50.4 | 6393          | 52.4 | 60                     | 18.1 | 13                     | 8.6  | 12                   | 7.5  |
| <b>Mother age (mean, SD) <sup>b</sup></b> | 35.39                          | 4.66 | 35.47         | 4.58 | 34.20                  | 5.06 | 33.99                  | 6.26 | 32.84                | 6.49 |
| <b>Father age (mean, SD) <sup>c</sup></b> | 37.61                          | 5.48 | 37.65         | 5.46 | 36.05                  | 5.56 | 37.85                  | 4.42 | 33.56                | 9.00 |
| <b>Mother highest level of education</b>  |                                |      |               |      |                        |      |                        |      |                      |      |
| Compulsory                                | 203                            | 1.8  | 168           | 1.5  | 15                     | 6.0  | 7                      | 5.1  | 13                   | 8.7  |
| High school                               | 2751                           | 23.8 | 2528          | 23.0 | 85                     | 34.0 | 65                     | 47.4 | 73                   | 49.0 |
| University less than 3 years              | 1307                           | 11.3 | 1238          | 11.2 | 35                     | 14.0 | 16                     | 11.7 | 18                   | 12.1 |
| University more than 3 years              | 7284                           | 63.1 | 7075          | 64.3 | 115                    | 46.0 | 49                     | 35.8 | 45                   | 30.2 |
| <b>Father highest level of education</b>  |                                |      |               |      |                        |      |                        |      |                      |      |
| Compulsory                                | 172                            | 2.4  | 161           | 2.3  | 4                      | 3.1  | 3                      | 13.6 | 4                    | 28.6 |
| High school                               | 2046                           | 28.1 | 1984          | 27.9 | 52                     | 40.6 | 5                      | 22.7 | 5                    | 35.7 |
| University less than 3 years              | 902                            | 12.4 | 879           | 12.3 | 17                     | 13.3 | 6                      | 27.3 | 0                    | 0.0  |
| University more than 3 years              | 4166                           | 57.2 | 4098          | 57.5 | 55                     | 43.0 | 8                      | 36.4 | 5                    | 35.7 |
| <b>Mother country of birth</b>            |                                |      |               |      |                        |      |                        |      |                      |      |
| Sweden                                    | 7051                           | 83.0 | 6716          | 82.9 | 171                    | 90.5 | 81                     | 86.2 | 83                   | 76.1 |
| Other                                     | 1440                           | 17.0 | 1383          | 17.1 | 18                     | 9.5  | 13                     | 13.8 | 26                   | 23.9 |
| <b>Father country of birth</b>            |                                |      |               |      |                        |      |                        |      |                      |      |
| Sweden                                    | 4484                           | 83.7 | 4374          | 83.7 | 89                     | 90.8 | 14                     | 87.5 | 7                    | 46.7 |
| Other                                     | 872                            | 16.3 | 853           | 16.3 | 9                      | 9.2  | 2                      | 12.5 | 8                    | 53.3 |
| <b>Coparenting quality</b>                |                                |      |               |      |                        |      |                        |      |                      |      |
| High                                      | 10284                          | 80.1 | 9989          | 81.9 | 190                    | 57.2 | 58                     | 38.4 | 47                   | 29.6 |
| Low                                       | 2561                           | 19.9 | 2214          | 18.1 | 142                    | 42.8 | 93                     | 61.6 | 112                  | 70.4 |

<sup>a</sup> Includes some same sex parents, <sup>b</sup> n = 9,028, <sup>c</sup> n = 5,697

Table 2. Total scores on Strengths and Difficulties Questionnaires (SDQ) and coparenting quality in relation to children's living arrangements (n=12,845)

|                                                  | <b>Children's living arrangements</b> |      |               |      |                        |      |                        |      |                      |      |
|--------------------------------------------------|---------------------------------------|------|---------------|------|------------------------|------|------------------------|------|----------------------|------|
|                                                  | Total sample                          |      | Intact family |      | Joint physical custody |      | Mostly with one parent |      | Only with one parent |      |
|                                                  | Mean                                  | SD   | Mean          | SD   | Mean                   | SD   | Mean                   | SD   | Mean                 | SD   |
| <b><i>SDQ Total Difficulties</i></b>             |                                       |      |               |      |                        |      |                        |      |                      |      |
| Total sample                                     | 7.11                                  | 4.27 | 7.07          | 4.23 | 7.26                   | 4.50 | 8.45                   | 5.28 | 8.55                 | 5.32 |
| High coparenting quality                         | 6.70                                  | 4.05 | 6.69          | 4.02 | 6.39                   | 4.22 | 7.79                   | 5.66 | 8.36                 | 5.71 |
| Low coparenting quality                          | 8.76                                  | 4.72 | 8.78          | 4.70 | 8.42                   | 4.61 | 8.86                   | 5.01 | 8.63                 | 5.18 |
| <b><i>Total score on coparenting quality</i></b> | 18.10                                 | 2.49 | 18.27         | 2.20 | 16.29                  | 3.79 | 13.88                  | 4.69 | 12.99                | 5.00 |

Table 3. Linear regression models of parental reports of the SDQ Total Difficulties by living arrangement, sociodemographic variables and coparenting quality (n=12,845)

|                                            | Model 1 |        |      | Model 2 |        |      | Model 3 |        |      |
|--------------------------------------------|---------|--------|------|---------|--------|------|---------|--------|------|
|                                            | B       | 95% CI |      | B       | 95% CI |      | B       | 95% CI |      |
| <b>Child gender</b>                        |         |        |      |         |        |      |         |        |      |
| Girl                                       | ref     |        |      | ref     |        |      | ref     |        |      |
| Boy                                        | 0.78    | 0.64   | 0.93 | 0.78    | 0.63   | 0.92 | 0.75    | 0.60   | 0.89 |
| <b>Living arrangement</b>                  |         |        |      |         |        |      |         |        |      |
| Intact family                              | ref     |        |      | ref     |        |      | ref     |        |      |
| Joint physical custody                     | 0.26    | -0.21  | 0.72 | 0.09    | -0.37  | 0.55 | -0.37   | -0.82  | 0.09 |
| Living mostly with one parent              | 1.53    | 0.84   | 2.21 | 1.21    | 0.54   | 1.89 | 0.40    | -0.27  | 1.07 |
| Living only with one parent                | 1.64    | 0.97   | 2.31 | 1.01    | 0.34   | 1.67 | 0.02    | -0.64  | 0.68 |
| <b>Respondent</b>                          |         |        |      |         |        |      |         |        |      |
| Mother                                     | ref     |        |      | ref     |        |      | ref     |        |      |
| Father                                     | 0.34    | 0.06   | 0.62 | 0.47    | 0.19   | 0.75 | 0.49    | 0.22   | 0.77 |
| Two parents together                       | 0.31    | 0.16   | 0.47 | 0.43    | 0.27   | 0.60 | 0.59    | 0.43   | 0.75 |
| <b>Parent age</b>                          |         |        |      |         |        |      |         |        |      |
| 35 to 44                                   |         |        |      | ref     |        |      | ref     |        |      |
| 24 and younger                             |         |        |      | 2.42    | 1.51   | 3.32 | 2.35    | 1.46   | 3.24 |
| 25 to 34                                   |         |        |      | 0.82    | 0.64   | 0.99 | 0.83    | 0.66   | 1.00 |
| 45 and older                               |         |        |      | -0.29   | -0.84  | 0.26 | -0.32   | -0.86  | 0.22 |
| Not reported                               |         |        |      | 0.71    | 0.34   | 1.09 | 0.68    | 0.32   | 1.05 |
| <b>Parental highest level of education</b> |         |        |      |         |        |      |         |        |      |
| University (3 years or more)               |         |        |      | ref     |        |      | ref     |        |      |
| Less than high school                      |         |        |      | 1.79    | 1.09   | 2.48 | 1.90    | 1.22   | 2.59 |
| High school                                |         |        |      | 0.72    | 0.53   | 0.91 | 0.68    | 0.49   | 0.87 |
| University (less than 3 years)             |         |        |      | 0.47    | 0.23   | 0.71 | 0.42    | 0.18   | 0.66 |
| Not reported                               |         |        |      | 0.92    | 0.37   | 1.44 | 0.90    | 0.38   | 1.43 |
| <b>Parent country of birth</b>             |         |        |      |         |        |      |         |        |      |
| Only Sweden                                |         |        |      | ref     |        |      | ref     |        |      |
| Sweden/other                               |         |        |      | 0.22    | -0.09  | 0.53 | 0.08    | -0.22  | 0.39 |
| Only other                                 |         |        |      | 1.06    | 0.79   | 1.32 | 1.00    | 0.74   | 1.26 |
| Not reported                               |         |        |      | -0.09   | -0.44  | 0.26 | -0.05   | -0.39  | 0.29 |
| <b>Coparenting quality</b>                 |         |        |      |         |        |      |         |        |      |
| High                                       |         |        |      |         |        |      | ref     |        |      |
| Low                                        |         |        |      |         |        |      | 2.05    | 1.86   | 2.23 |

Model 1 was adjusted for child's gender and respondent. Model 2 was also adjusted for parents' age, educational level, and country of birth. Model 3 was additionally adjusted for coparenting quality

Table 4. Linear regression models of parental reports of the SDQ Total Difficulties by living arrangement/level of coparenting quality and sociodemographic variables (n=12,845)

|                                                    | Model 1 |        |      | Model 2 |        |      |
|----------------------------------------------------|---------|--------|------|---------|--------|------|
|                                                    | B       | 95% CI |      | B       | 95% CI |      |
| <b>Living arrangement</b>                          |         |        |      |         |        |      |
| Intact family/<br>high coparenting                 | ref     |        |      | ref     |        |      |
| Intact family<br>/low coparenting                  | 2.12    | 1,92   | 2,31 | 2.10    | 1,91   | 2,29 |
| Joint physical custody/<br>high coparenting        | -0.23   | -0,83  | 0,37 | -0.39   | -0,98  | 0,21 |
| Joint physical custody/<br>low coparenting         | 1.91    | 1,22   | 2,61 | 1.73    | 1,04   | 2,42 |
| Living mostly with one parent/<br>high coparenting | 1.27    | 0,19   | 2,35 | 0.95    | -0,11  | 2,02 |
| Living mostly with one parent/<br>low coparenting  | 2.42    | 1,56   | 3,27 | 2.11    | 1,26   | 2,95 |
| Living only with one parent/<br>high coparenting   | 1.87    | 0,68   | 3,07 | 1.34    | 0,16   | 2,53 |
| Living only with one parent/<br>low coparenting    | 2.18    | 1,40   | 2,96 | 1.52    | 0,74   | 2,30 |

Model 1 was adjusted for child's gender and respondent. Model 2 was also adjusted for parents' age, educational level, and country of birth

# BMJ Paediatrics Open

## THE IMPORTANCE OF LIVING ARRANGEMENTS AND COPARENTING QUALITY FOR YOUNG CHILDREN'S MENTAL HEALTH AFTER PARENTAL DIVORCE-A CROSS-SECTIONAL PARENTAL SURVEY

|                               |                                                                                                                                                                                                                                                                                                                                                                     |
|-------------------------------|---------------------------------------------------------------------------------------------------------------------------------------------------------------------------------------------------------------------------------------------------------------------------------------------------------------------------------------------------------------------|
| Journal:                      | <i>BMJ Paediatrics Open</i>                                                                                                                                                                                                                                                                                                                                         |
| Manuscript ID                 | bmjpo-2020-000657.R1                                                                                                                                                                                                                                                                                                                                                |
| Article Type:                 | Original research                                                                                                                                                                                                                                                                                                                                                   |
| Date Submitted by the Author: | 31-Aug-2020                                                                                                                                                                                                                                                                                                                                                         |
| Complete List of Authors:     | Bergstrom, Malin; Centre for Health Equity Studies<br>Salari, Raziye; Uppsala University, Department of public health and<br>caring sciences<br>Hjern, Anders; Centre for Health Equity Studies, ;<br>Hognäs, Robin; Stockholm University, Public Health<br>Bergqvist, Kersti; Centre for Health Equity Studies<br>Fransson, Emma; Centre for Health Equity Studies |
| Keywords:                     | Child Psychology, Comm Child Health                                                                                                                                                                                                                                                                                                                                 |
|                               |                                                                                                                                                                                                                                                                                                                                                                     |

SCHOLARONE™  
Manuscripts



I, the Submitting Author has the right to grant and does grant on behalf of all authors of the Work (as defined in the below author licence), an exclusive licence and/or a non-exclusive licence for contributions from authors who are: i) UK Crown employees; ii) where BMJ has agreed a CC-BY licence shall apply, and/or iii) in accordance with the terms applicable for US Federal Government officers or employees acting as part of their official duties; on a worldwide, perpetual, irrevocable, royalty-free basis to BMJ Publishing Group Ltd ("BMJ") its licensees and where the relevant Journal is co-owned by BMJ to the co-owners of the Journal, to publish the Work in this journal and any other BMJ products and to exploit all rights, as set out in our [licence](#).

The Submitting Author accepts and understands that any supply made under these terms is made by BMJ to the Submitting Author unless you are acting as an employee on behalf of your employer or a postgraduate student of an affiliated institution which is paying any applicable article publishing charge ("APC") for Open Access articles. Where the Submitting Author wishes to make the Work available on an Open Access basis (and intends to pay the relevant APC), the terms of reuse of such Open Access shall be governed by a Creative Commons licence – details of these licences and which [Creative Commons](#) licence will apply to this Work are set out in our licence referred to above.

Other than as permitted in any relevant BMJ Author's Self Archiving Policies, I confirm this Work has not been accepted for publication elsewhere, is not being considered for publication elsewhere and does not duplicate material already published. I confirm all authors consent to publication of this Work and authorise the granting of this licence.

1  
2  
3 1 "THE IMPORTANCE OF LIVING ARRANGEMENTS AND COPARENTING QUALITY  
4 2 FOR YOUNG CHILDREN'S MENTAL HEALTH AFTER PARENTAL DIVORCE-A  
5 3 CROSS-SECTIONAL PARENTAL SURVEY."  
6 4  
7 5  
8 6

9 6 Malin Bergström\*1,2, Raziye Salari\*3, Anders Hjern1,2, Robin Högnäs1,  
10 7 Kersti Bergqvist1, Emma Fransson1,4

11 8 \*Equal contribution

12 9 1 Centre for Health Equity Studies, Stockholm University/ Karolinska Institutet, 106 91

13 10 Stockholm, Sweden

14 11 2 Clinical Epidemiology, Department of Medicine, Karolinska Institutet, 171 77 Stockholm,  
15 12 Sweden

16 13 3 Child Health and Parenting (CHAP), Department of Public Health and Caring Sciences,  
17 14 Uppsala University, Uppsala, Sweden

18 15 4 Department of Women's and Children's Health, Uppsala University, Uppsala, Sweden

19 16  
20 17 Corresponding author: Correspondence concerning this article should be addressed to  
21 18 Anders Hjern, Centre for Health Equity Studies; Department of public health science,  
22 19 Stockholm University/ Karolinska Institutet, 106 91 Stockholm, Sweden. Email:  
23 20 [anders.hjern@chess.su.se](mailto:anders.hjern@chess.su.se).  
24 21

25 22 Word count: 3081  
26 23

27 24 **ABSTRACT**

28 25 **Background** Parental separation has been associated with adverse child mental health  
29 26 outcomes in the literature. For school aged children, joint physical custody (JPC) i.e. spending  
30 27 equal time in both parents' homes after a divorce, has been associated with better health and  
31 28 wellbeing than single care arrangements. Preschool children's wellbeing in JPC is less  
32 29 studied. The aim of this study was to investigate the association of living arrangements and  
33 30 coparenting quality with mental health in preschool children after parental separation.

34 31 **Methods** This cross-sectional population-based study includes 12,845 3-year-old children in  
35 32 Sweden. Mental health was measured by parental reports of the Strength and Difficulties  
36 33 Questionnaire (SDQ) and coparenting quality with a four-item scale. The living arrangements  
37 34 of the 642 children in non-intact families were categorized into JPC, living mostly with one  
38 35 parent and living only with one parent.

1  
2  
3 36 **Results** Linear regression models, adjusted for socio-demographic confounders, showed an  
4  
5 37 association between increased mental health problems and living mostly and only with one  
6  
7 38 parent (B=1.18; CI=0.37-2.00, and B=1.20; CI=0.40-2.00 respectively), while children in  
8  
9 39 intact families versus JPC did not differ significantly (B=-0.11; CI=-0.58-0.36). After  
10  
11 40 adjusting the analyses for coparenting quality, differences in child mental health between the  
12  
13 41 post divorce living arrangements were however minimal while children in intact families had  
14  
15 42 more mental health problems compared with JPC (B=0.70;CI=0.24-1.15). Factorial  
16  
17 43 ANCOVA revealed that low coparenting quality was more strongly related to mental health  
18  
19 44 problems for children in intact families and JPC compared to children living mostly or only  
20  
21 45 with one parent.

22 46 **Conclusions** This study suggests that coparenting quality is a key determinant of mental  
23  
24 47 health in preschool children and thus should be targeted in preventive interventions.  
25  
26 48

27 49 **Key words** Children, Divorce, Joint physical custody, Coparenting, Parental separation,  
28  
29 50 Psychological problems  
30  
31 51

#### 32 52 **WHAT IS ALREADY KNOW ON THIS TOPIC:**

- 33 53  Parental separation is a common experience for children in high-income countries.  
34 54  Joint physical custody, where children share their time about equally between their parents'  
35 55 homes, has become an increasingly common living arrangement after parental separation.  
36 56  There is a dearth of empirical studies on child mental health in joint physical custody in the  
37 57 preschool age.  
38  
39 58

#### 40 59 **WHAT THIS STUDY HOPES TO ADD:**

- 41 60  We found similar mental health in three-year-old children in joint physical custody and  
42 61 intact families, while children living only and mostly with one parent had more mental health  
43 62 problems, net of sociodemographic characteristics.  
44 63  Once we accounted for coparenting quality, child mental health in the diverse living  
45 64 arrangements after parental divorce was very similar.  
46 65  Our results imply that coparenting is of major importance for understanding mental health  
47 66 problems that emerge early in life, and could be targeted with interventions in families with  
48 67 young children.  
49  
50 68

#### 51 69 **INTRODUCTION**



1  
2  
3 70 Around 35% of Swedish children experience parental separation before reaching the age of 18  
4  
5 71 years, and previous studies have shown that the experience of parental separation is associated  
6  
7 72 with adverse mental health outcomes in the short as well as the long term.(1, 2) During recent  
8  
9 73 decades, parenting norms have changed in the Nordic countries, and sole custody among  
10  
11 74 mothers has become less common than joint physical custody (JPC), where children share  
12  
13 75 their time about equally between their parents' respective homes.(3-5) In Sweden,  
14  
15 76 approximately 10% of all school children live in JPC arrangements.(3) JPC is also  
16  
17 77 increasingly common even in countries with more conservative family values such as  
18  
19 78 Germany and France.(6, 7)

### 20 80 **Living arrangements and child wellbeing**

21  
22 81 A growing body of research has shown that living arrangements and contact with both parents  
23  
24 82 is associated with post-divorce child wellbeing.(8) Most studies in the literature have  
25  
26 83 suggested that school-aged children and adolescents in JPC fare better on several outcomes  
27  
28 84 compared to children in single-parent arrangements.(9,10) JPC arrangements among  
29  
30 85 preschool children has been much less studied. In a recent Swedish study (11), 3- to 5-year-  
31  
32 86 olds who lived in JPC had fewer mental health problems compared to those living in single-  
33  
34 87 parent arrangements. Similar findings were reported in a Nordic study on children aged 2-9  
35  
36 88 years.(12) Studies in contexts outside of the Nordic countries have shown similar but  
37  
38 89 somewhat more diverse results.(13-15) Pruett, Ebling (14) found that overnight stays with the  
39  
40 90 second parent were associated with advantages in social functioning and fewer psychological  
41  
42 91 problems among girls. However, McIntosh and Smyth (13) found that generally the 2- to 3-  
43  
44 92 year-olds who spent 35% or more time with their second parent, experienced more problems  
45  
46 93 compared to their peers who has less contact with their second parent. Tornello, Emery (15)  
47  
48 94 did not find any significant association between custody arrangements in socially and  
49  
50 95 economically disadvantaged families and psychological problems at age 3, but nonetheless  
51  
52 96 found fewer problems among 5-year-old children who had JPC versus single-parent  
53  
54 97 arrangements at age 3.

### 53 99 **Coparenting quality and child wellbeing**

54  
55 100 High-quality coparenting has been found to contribute to a positive emotional family climate  
56  
57 101 and to affect child mental health and social adjustment positively.(16) Children whose parents  
58  
59 102 work well together in childrearing issues are typically better off during early childhood,  
60  
103 adolescence and adulthood.(17) The association between coparenting quality and child

1  
2  
3 104 wellbeing outcomes seems to be stronger than other characteristics of parental relationships,  
4  
5 105 such as intimacy and love.(18) The lower levels of health and wellbeing observed among  
6  
7 106 children with separated parents may thus hypothetically be linked to their parents' ability to  
8  
9 107 amicably share the responsibilities of childrearing.(19) It is important to highlight that  
10  
11 108 coparenting quality is a broader construct than parental conflict. Not only does coparenting  
12  
13 109 include positive measures, it is conceptually distinct from the quality of parental relationships  
14  
15 110 because it directly involves the children.(17)

111

112 The aim of this study was to investigate whether mental health in 3-year-old children is  
113 associated with their living arrangements after a parental separation, and whether parental  
114 coparenting quality moderates this association.

115

## 116 **METHODS**

### 117 **Study population**

118 The population of this study was sampled from a total population of 19,294 children in a  
119 defined geographical area in the Stockholm county, who were invited to a routine visit at the  
120 age of three years by the regional Preventive Child Health Care (PCHC) from December 2015  
121 to May 2018. The PCHC is funded by regional taxes and their services are offered to all  
122 children who reside in the county free of charge. In the invitation letter, parents were  
123 informed about the study and that the survey would be used to individualise the visit at the  
124 PCHC. The letter included a web-link to the survey which was only available in Swedish. The  
125 study was approved by the Regional Ethical Review Board in Stockholm (Dnr 2015-228631)  
126 and parents to children in the PCHC were involved in the piloting phase of this study.

127

128 In total, 13,493 surveys were submitted. Of these, 112 surveys were excluded because the  
129 participants had reported that they were the sole parent of the child since childbirth and 32  
130 surveys were excluded because parents had completed the survey twice for the same child.

131 We also excluded 504 surveys because they were completed by someone other than a parent  
132 or because information was missing on the main variables of interest. Thus, 12,845 children  
133 were included in the study, equivalent to a participation rate of 66.6% of the total population  
134 of 3-year-olds in the area.

135

### 136 **Patient and Public involvement statement**

1  
2  
3 137 Parents to children in the child health services in Stockholm were involved in the piloting  
4  
5 138 phase of this study, where they provided feedback on questionnaires and the procedure in  
6  
7 139 qualitative interviews and in a quantitative evaluation in writing. We do not plan to have  
8  
9 140 parents involved in the dissemination of the results of the study.  
10  
11  
12 141  
13  
14 142

### 15 143 **Procedure**

16 144 The survey included questions on sociodemographic background, children's development,  
17 145 behaviours and symptoms, parents' worries, and coparenting quality. Parents were  
18 146 encouraged to complete the survey together.  
19  
20  
21  
22 147

### 23 148 **Measures**

24 149 *Outcome measure.* The main outcome in the study was based on parental report of the  
25 150 Swedish version of the Strengths and Difficulties Questionnaire (SDQ) which has been  
26 151 successfully validated for preschool aged children.(20) We used the total sum of scores from  
27 152 the four symptom subscales (SDQ Total Difficulties) ranging from 0 to 40.  
28  
29  
30  
31 153

32 154 *Living arrangements.* Living arrangement groups were based on parents' answers to the  
33 155 question "What does the child's family look like? The child lives with...". The options were:  
34 156 (a) intact family, (b) joint physical custody (about 50/50 in each parent's home), (c) living  
35 157 mostly with mother/father (collapsed here to living mostly with one parent), and (d) living  
36 158 only with mother/father (collapsed here to living only with one parent).  
37  
38  
39  
40  
41  
42  
43 159

44 160 *Coparenting quality.* Coparenting was measured using a four-item scale inspired by the  
45 161 coparenting scale posited by McHale and Kuersten-Hogan.(21) Parents were asked about their  
46 162 ability to cooperate, support each other, and confide in/trust each other, and the extent to  
47 163 which they experienced conflict related to their children. Items were rated on a 5-point scale  
48 164 from 1 (disagree completely) to 5 (agree completely). Higher scores indicated better  
49 165 coparenting. The scale showed good internal consistency (Cronbach's alpha = 0.79).  
50 166 Confirmatory factor analysis revealed an acceptable fit for the one factor model: comparative  
51 167 fit index (CFI) = 0.99; Tucker-Lewis index (TLI) = 0.98; root mean square error of  
52 168 approximation (RMSEA) = 0.066 (90% confidence interval = 0.056 – 0.076). For the  
53  
54  
55  
56  
57  
58  
59  
60

1  
2  
3 169 ANCOVA analyses, we used a dichotomisation where coparenting quality of 15 and below  
4 170 was considered low while coparenting quality of 16 and above was considered high. Parents  
5 171 who had chosen the option 3 (neither agree or disagree) for at least one of the four items were  
6 172 thus dichotomised as reporting low coparenting quality.  
7  
8  
9

10 173

11 174 *Background data on children and parents.* We used the following background characteristics:  
12 175 child gender (girl/boy); responding parent (categorised as mother/father/both, where both  
13 176 included a few cases of same-sex parents); mothers' and fathers' age presented as mean and  
14 177 standard deviations; mothers' and fathers' highest level of education (compulsory/high  
15 178 school/university (less than 3 years)/university (3 years or more)/not reported); and mothers'  
16 179 and fathers' country of birth (grouped as Sweden/other/not reported).  
17  
18  
19  
20  
21

22 180

### 23 181 *Statistical analyses*

24 182 The scores were scaled up pro-rata for the coparenting scale if only one item was missing, and  
25 183 for SDQ if only one or two items per subscale were missing. Hierarchical regression models  
26 184 were estimated in three steps with the SDQ total score as the outcome, living arrangements as  
27 185 the exposure variable and JPC as reference. Model 1 adjusted for child gender and whether  
28 186 the survey was filled in by the mother, father or both. Model 2 added maternal education. In  
29 187 the fully adjusted Model 3, coparenting quality as a continuous measure was added to Model  
30 188 2. To investigate the possibility that coparenting quality moderated the association between  
31 189 family type and the SDQ total score for children, we used factorial ANCOVA with children's  
32 190 living arrangement and coparenting quality (dichotomised into high and low levels) as factors  
33 191 and child gender, the survey being filled in by the mother and mother's education (at least  
34 192 three years of university education) entered as covariates.  
35  
36  
37  
38  
39  
40  
41  
42  
43  
44

45 193

## 46 194 **RESULTS**

### 47 195 **Background characteristics**

48 196 Characteristics of children and parents are presented in Table 1. About 95% of the 3-year-olds  
49 197 lived with both parents, in intact families. Children in equal JPC constituted 2.6% of the total  
50 198 sample, while 1.2% of the children lived mostly with one parent and as many lived only with  
51 199 one parent. The sample included slightly more boys than girls in all family types. In intact  
52 200 families, most parents completed the survey together, while in other family types, mothers  
53 201 often completed the survey alone. Separated mothers were slightly younger than those in  
54 202 intact families and fathers in single care families were younger than fathers in the other family  
55  
56  
57  
58  
59  
60

1  
2  
3 203 types. A university-level education of at least three years was most common for mothers and  
4 204 fathers in intact families and least common in families where the child only lived with one  
5 205 parent. More children to parents born outside of Sweden lived only with one parent compared  
6 206 with JPC. Data on father's educational level as well as on parents' country of birth was  
7 207 missing for a large part of the sample. Low coparenting quality was more common among  
8 208 parents who did not live together and in particular in families where the child only lived with  
9 209 one parent.  
10  
11  
12  
13  
14  
15  
16  
17  
18  
19  
20  
21  
22  
23  
24  
25  
26  
27  
28  
29  
30  
31  
32  
33  
34  
35  
36  
37  
38  
39  
40  
41  
42  
43  
44  
45  
46  
47  
48  
49  
50  
51  
52  
53  
54  
55  
56  
57  
58  
59  
60

Table 1. Characteristics of children and parents in different living arrangements

|                                           | Children's living arrangements |      |               |      |                        |      |                        |      |                      |      |
|-------------------------------------------|--------------------------------|------|---------------|------|------------------------|------|------------------------|------|----------------------|------|
|                                           | Total sample                   |      | Intact family |      | Joint physical custody |      | Mostly with one parent |      | Only with one parent |      |
|                                           | (n=12845)                      |      | (n=12203)     |      | (n=332)                |      | (n=151)                |      | (n=159)              |      |
| <b>Sociodemographic variables</b>         | n                              | %    | n             | %    | n                      | %    | n                      | %    | n                    | %    |
| <b>Child gender</b>                       |                                |      |               |      |                        |      |                        |      |                      |      |
| Girl                                      | 6220                           | 48.1 | 5903          | 48.0 | 163                    | 48.5 | 75                     | 49.7 | 79                   | 49.1 |
| Boy                                       | 6641                           | 51.3 | 6313          | 51.4 | 171                    | 50.9 | 76                     | 50.3 | 81                   | 50.3 |
| Not reported                              | 76                             | 0.6  | 73            | 0.6  | 2                      | 0.6  | 0                      | 0.0  | 1                    | 0.6  |
| <b>Responding parent</b>                  |                                |      |               |      |                        |      |                        |      |                      |      |
| Female (mother)                           | 5342                           | 41.3 | 4873          | 39.7 | 201                    | 59.8 | 126                    | 83.4 | 142                  | 88.2 |
| Male (father)                             | 1058                           | 8.2  | 968           | 7.9  | 73                     | 21.7 | 12                     | 7.9  | 5                    | 3.1  |
| Two parents together <sup>a</sup>         | 6519                           | 50.4 | 6433          | 52.3 | 60                     | 17.9 | 13                     | 8.6  | 13                   | 8.1  |
| Not reported                              | 18                             | 0.1  | 15            | 0.1  | 2                      | 0.6  | 0                      | 0.0  | 1                    | 0.6  |
| <b>Mother age (mean, SD) <sup>b</sup></b> | 35.39                          | 4.66 | 35.47         | 4.58 | 34.18                  | 5.06 | 33.99                  | 6.26 | 32.84                | 6.49 |
| <b>Father age (mean, SD) <sup>c</sup></b> | 37.60                          | 5.48 | 37.64         | 5.46 | 36.05                  | 5.56 | 37.85                  | 4.42 | 33.56                | 9.00 |
| <b>Mother highest level of education</b>  |                                |      |               |      |                        |      |                        |      |                      |      |
| Compulsory                                | 203                            | 1.6  | 168           | 1.4  | 15                     | 4.5  | 7                      | 4.6  | 13                   | 8.2  |
| High school                               | 2751                           | 21.4 | 2528          | 20.7 | 85                     | 25.6 | 65                     | 43.0 | 73                   | 45.9 |
| University less than 3 years              | 1307                           | 10.2 | 1238          | 10.1 | 35                     | 10.5 | 16                     | 10.6 | 18                   | 11.3 |
| University more than 3 years              | 7284                           | 56.7 | 7075          | 58.0 | 115                    | 34.6 | 49                     | 32.5 | 45                   | 28.3 |
| Not reported                              | 1300                           | 10.1 | 1194          | 9.8  | 82                     | 24.7 | 14                     | 9.3  | 10                   | 6.3  |
| <b>Father highest level of education</b>  |                                |      |               |      |                        |      |                        |      |                      |      |
| Compulsory                                | 172                            | 1.3  | 161           | 1.3  | 4                      | 1.2  | 3                      | 2.0  | 4                    | 2.5  |
| High school                               | 2046                           | 15.9 | 1984          | 16.3 | 52                     | 15.7 | 5                      | 3.3  | 5                    | 3.1  |
| University less than 3 years              | 902                            | 7.0  | 879           | 7.2  | 17                     | 5.1  | 6                      | 4.0  | 0                    | 0.0  |
| University more than 3 years              | 4166                           | 32.4 | 4098          | 33.6 | 55                     | 16.6 | 8                      | 5.3  | 5                    | 3.1  |
| Not reported                              | 5559                           | 43.3 | 5081          | 41.6 | 204                    | 61.4 | 129                    | 85.4 | 145                  | 91.2 |
| <b>Mother country of birth</b>            |                                |      |               |      |                        |      |                        |      |                      |      |
| Sweden                                    | 7051                           | 54.9 | 6716          | 55.0 | 171                    | 51.5 | 81                     | 53.6 | 83                   | 52.2 |
| Other                                     | 1440                           | 11.2 | 1383          | 11.3 | 18                     | 5.4  | 13                     | 8.6  | 26                   | 16.4 |
| Not reported                              | 4354                           | 33.9 | 4104          | 33.6 | 143                    | 43.1 | 57                     | 37.7 | 50                   | 31.4 |
| <b>Father country of birth</b>            |                                |      |               |      |                        |      |                        |      |                      |      |
| Sweden                                    | 4484                           | 34.9 | 4374          | 35.8 | 89                     | 26.8 | 14                     | 9.3  | 7                    | 4.4  |
| Other                                     | 872                            | 6.8  | 853           | 7.0  | 9                      | 2.7  | 2                      | 1.3  | 8                    | 5.0  |
| Not reported                              | 7489                           | 58.3 | 6976          | 57.2 | 234                    | 70.5 | 135                    | 89.4 | 144                  | 90.6 |
| <b>Coparenting quality</b>                |                                |      |               |      |                        |      |                        |      |                      |      |
| High                                      | 11314                          | 88.1 | 10972         | 89.9 | 218                    | 65.7 | 70                     | 46.4 | 54                   | 34.0 |
| Low                                       | 1531                           | 11.9 | 1231          | 10.1 | 114                    | 34.3 | 81                     | 53.6 | 105                  | 66.0 |

<sup>a</sup> Includes some same sex parents, <sup>b</sup> n = 9,028, <sup>c</sup> n = 5,697

210

211

212

### 213 **Child mental health in relation to background characteristics**

214 Mental health problems according to SDQ for children in different family types are reported  
 215 in Table 2. Fewer problems were reported for children in intact families followed by children  
 216 in JPC. Children living mostly or only with one parent had more mental health problems.  
 217 Boys had more problems compared with girls and children of mothers with high educational  
 218 levels suffered from less problems compared with those with less educated mothers.

219

Table 2. Mean values and standard deviations of the SDQ in relation to sociodemographic variables

|                                          | SDQ Total score |      |      |
|------------------------------------------|-----------------|------|------|
|                                          | <i>n</i>        | Mean | SD   |
| <b>Living arrangement</b>                |                 |      |      |
| Intact family                            | 12203           | 7.07 | 4.23 |
| Joint physical custody                   | 332             | 7.26 | 4.50 |
| Mostly with one parent                   | 151             | 8.45 | 5.28 |
| Only with one parent                     | 159             | 8.55 | 5.32 |
| <b>Child gender</b>                      |                 |      |      |
| Girl                                     | 6213            | 6.70 | 4.10 |
| Boy                                      | 6632            | 7.50 | 4.39 |
| <b>Responding parent</b>                 |                 |      |      |
| Female (mother)                          | 5315            | 6.95 | 4.26 |
| Male (father)                            | 1052            | 7.30 | 4.34 |
| Two parents together <sup>a</sup>        | 6478            | 7.21 | 4.27 |
| <b>Mother highest level of education</b> |                 |      |      |
| Compulsory                               | 203             | 8.72 | 5.56 |
| High school                              | 2751            | 7.67 | 4.53 |
| University less than 3 years             | 1307            | 7.31 | 4.31 |
| University more than 3 years             | 7284            | 6.77 | 4.04 |
| Not reported                             | 1300            | 7.41 | 4.45 |

220 <sup>a</sup> Includes some same sex parents

221

### 222 **Multivariate modelling**

223 Table 3 shows the results from linear regression models, which suggest that children living  
 224 mostly or only with one parent, compared with those in JPC, had more mental health  
 225 problems. However, children in intact families were not significantly different from those in  
 226 JPC in terms of mental health. When sociodemographic variables were adjusted for, in Model  
 227 2, the differences between those living only and mostly with one parent and those in JPC were

228 attenuated. Coefficients remained significant, however, indicating that only some of the  
 229 differences were explained by the background characteristics. In Model 3, after including  
 230 coparenting quality, the differences between those living only and mostly with one parent and  
 231 in JPC were no longer significant. Instead, differences between children in intact families and  
 232 JPC became significant suggesting that children living in JPC showed fewer problems  
 233 compared to children in intact families after controlling for coparenting quality.

234  
 235

Table 3. Linear regression models of parental reports of the SDQ Total Difficulties by living arrangement, sociodemographic variables and coparenting quality (n=12,845)

|                                            | Model 1 |        |      |       | Model 2 |        |      |       | Model 3 |        |       |       |
|--------------------------------------------|---------|--------|------|-------|---------|--------|------|-------|---------|--------|-------|-------|
|                                            | B       | 95% CI |      | p     | B       | 95% CI |      | p     | B       | 95% CI |       | p     |
| <b>Living arrangement</b>                  |         |        |      |       |         |        |      |       |         |        |       |       |
| Joint physical custody                     | Ref     |        |      |       | Ref     |        |      |       | Ref     |        |       |       |
| Intact family                              | -0.26   | -0.72  | 0.21 | 0.283 | -0.11   | -0.58  | 0.36 | 0.643 | 0.70*   | 0.24   | 1.15  | 0.003 |
| Living mostly with one parent              | 1.27*   | 0.45   | 2.09 | 0.002 | 1.18*   | 0.37   | 2.00 | 0.004 | 0.14    | -0.66  | 0.93  | 0.735 |
| Living only with one parent                | 1.38*   | 0.58   | 2.19 | 0.001 | 1.20*   | 0.40   | 2.00 | 0.003 | -0.25   | -1.03  | 0.54  | 0.537 |
| <b>Child gender</b>                        |         |        |      |       |         |        |      |       |         |        |       |       |
| Girl                                       | Ref     |        |      |       | Ref     |        |      |       | Ref     |        |       |       |
| Boy                                        | 0.78*   | 0.64   | 0.93 | 0.000 | 0.78*   | 0.63   | 0.93 | 0.000 | 0.74*   | 0.60   | 0.88  | 0.000 |
| <b>Respondent</b>                          |         |        |      |       |         |        |      |       |         |        |       |       |
| Female (mother)                            | Ref     |        |      |       | Ref     |        |      |       | Ref     |        |       |       |
| Male (father)                              | 0.34*   | 0.06   | 0.62 | 0.019 | -0.37   | -0.96  | 0.22 | 0.220 | -0.38   | -0.95  | 0.20  | 0.199 |
| Two parents together a                     | 0.31*   | 0.16   | 0.47 | 0.000 | 0.37*   | 0.21   | 0.53 | 0.000 | 0.60*   | 0.45   | 0.75  | 0.000 |
| <b>Mother's highest level of education</b> |         |        |      |       |         |        |      |       |         |        |       |       |
| University (3 years or more)               |         |        |      |       | Ref     |        |      |       | Ref     |        |       |       |
| Compulsory                                 |         |        |      |       | 1.92*   | 1.32   | 2.51 | 0.000 | 1.99*   | 1.42   | 2.57  | 0.000 |
| High school                                |         |        |      |       | 0.88*   | 0.69   | 1.07 | 0.000 | 0.80*   | 0.62   | 0.98  | 0.000 |
| University (less than 3 years)             |         |        |      |       | 0.56*   | 0.32   | 0.81 | 0.000 | 0.52*   | 0.28   | 0.76  | 0.000 |
| Not reported                               |         |        |      |       | 1.07*   | 0.53   | 1.60 | 0.000 | 1.06*   | 0.54   | 1.58  | 0.000 |
| <b>Coparenting quality</b>                 |         |        |      |       |         |        |      |       |         |        |       |       |
|                                            |         |        |      |       |         |        |      |       | -0.45*  | -0.48  | -0.42 | 0.000 |

236 <sup>a</sup> Includes some same sex parents

237 \*  $P < .05$

238  
 239

240

241 -----Figure 1 in about here-----

## 242 Factorial ANCOVA

243 The factorial ANCOVA analysis revealed a significant interaction effect for children's living  
 244 arrangement by coparenting quality  $F(3, 12\ 834) = 3.770, p < .01$ . Post hoc comparisons



1  
2  
3 245 yielded no significant differences between children's living arrangement, while low  
4  
5 246 coparenting quality was associated with more mental health problems. As shown in Figure 1,  
6  
7 247 high quality coparenting was strongly associated with fewer mental health problems for  
8  
9 248 children living in intact families and joint physical custody. For children living mostly or only  
10  
11 249 with one parent this difference was smaller and not statistically significant at the  $p < 0.05$  level.  
12  
13 250 In addition, children living in JPC fared better than children in intact families when  
14  
15 251 coparenting quality was low.

15 252

### 17 253 **Sensitivity analyses**

18  
19 254 As sensitivity analyses, we used multiple imputation (MI) to impute missing values on SDQ  
20  
21 255 and coparenting scale (imputed at item level), as well as mother education (compulsory and  
22  
23 256 high school had to be combined to run the MI). The regression analyses and estimated  
24  
25 257 marginal means in the ANCOVA model revealed the same pattern of results (not shown).

25 258

## 27 259 **DISCUSSION**

28  
29 260 This cross-sectional study of 12,845 3-year-olds in Stockholm, demonstrated very similar  
30  
31 261 mental health outcomes in children in JPC after parental separation compared with children in  
32  
33 262 intact families, while children living mostly and only with one parent had more mental health  
34  
35 263 problems, net of sociodemographic characteristics. These findings are consistent with another  
36  
37 264 Swedish cohort of 3- to 5-year-olds (11) and studies on older children in the Nordic  
38  
39 265 countries.(e.g., 12, 22, 23) The addition of coparenting quality in the analyses, however,  
40  
41 266 changed the picture of how children's mental health is related to family type.

41 267

### 43 268 **The findings in relation to coparenting quality**

44  
45 269 Regardless of family type, children with parents with low quality coparenting relationships  
46  
47 270 had more mental health problems than their counterparts in families where parents reported  
48  
49 271 high coparenting quality. Schoppe-Sullivan & Weldon (24) have previously shown that  
50  
51 272 coparenting quality may moderate the association between children's socioemotional  
52  
53 273 development (such as self-control) and later externalizing behaviours. The impact of parental  
54  
55 274 conflict on children's wellbeing is well established in the literature.(19) A systematic review  
56  
57 275 has previously concluded that coparenting is a key mechanism within the family system for  
58  
59 276 child mental health outcomes following divorce.(25) The results of our study suggest that  
60  
277 coparenting quality is a determinant of children's mental health symptoms not only among  
278  
279 278 children with separated or divorced parents, but in particular for those in intact families. Our

1  
2  
3 279 study, hence, extends this literature by providing evidence that coparenting quality may be  
4  
5 280 more important for young children's mental health than their family form per se.

6 281  
7  
8 282 Coparenting quality differed between parents in different post-divorce family types and  
9  
10 283 among those still cohabiting, which may explain differences in how children fare across  
11  
12 284 family forms. An interesting finding was that fewer child mental health problems were  
13  
14 285 reported in low coparenting quality families when parents shared custody in two separate  
15  
16 286 homes than as an intact family. Indeed, prior research has found similar patterns related to  
17  
18 287 parental conflict. In a longitudinal Swedish study, adults who had grown up in intact families  
19  
20 288 characterized by serious disagreement, reported the lowest level of psychological wellbeing,  
21  
22 289 followed by those who had experienced parental conflict and parental divorce.(26) Similarly,  
23  
24 290 another Swedish study found that children who grew up with divorced parents had poorer  
25  
26 291 psychological health as young adults, but parental conflict and economic hardship during  
27  
28 292 childhood attenuated the association.(27)

29 293  
30 294 Coparenting quality played a lesser role for children living mostly or only with one parent. It  
31  
32 295 seems plausible that coparenting quality affects children less when one parent is the primary  
33  
34 296 care giver and the need for cooperation between the parents is, thus, limited. Parenting quality  
35  
36 297 of the primary care giver may, for these children, be of greater importance.

37 298  
38 299 Currently, parenting interventions mainly focus on improving the quality of parenting  
39  
40 300 children receive and primarily target mothers.(28) Unfortunately, positive effects of such  
41  
42 301 programs have not been extended to coparenting quality.(29) Our results suggest that  
43  
44 302 coparenting skills may be an important and distinct dimension that should be given more  
45  
46 303 attention in parenting interventions and that such programs should be evaluated in terms of  
47  
48 304 their impact on child wellbeing and mental health.(30, 31)

49 305  
50 306 We have previously discussed whether children's wellbeing related to custody arrangements  
51  
52 307 may be explained by socioeconomic status, by an increased closeness to the father in JPC, or  
53  
54 308 by whether children experience a loss of social and economic resources. Earlier studies show  
55  
56 309 that although these factors contributed to children's wellbeing, adjusting for them did not  
57  
58 310 eliminate the differences in wellbeing between children living in different family types.(2, 9,  
59  
60 311 11, 12, 23) By exploring the interaction between coparenting quality and family types, we  
312 may capture a large proportion of the unmeasured variance; these are differences between

1  
2  
3 313 groups that have been unexplained in previous studies. The current study did not, however,  
4 314 address the potential interaction between good/poor parenting quality and children's  
5 315 temperaments. Schoppe-Sullivan & Weldon (24) showed that children with low self-control  
6 316 (low on the effortful control temperament scale) were helped by a supporting coparenting  
7 317 environment. In this context, the risk of negative behaviours that typically follow such  
8 318 temperament was attenuated.

9  
10  
11  
12  
13 319

### 14 320 **Methodological considerations**

15 321 Compared to earlier studies examining JPC among very young children, this study has  
16 322 considerable advantages. First, the size of our sample of children in this living arrangement by  
17 323 far exceeds that of earlier studies. Second, these children live in about equal JPC, whereas  
18 324 JPC in other studies may be based on overnights or unequal distribution of time between the  
19 325 parents' homes. Furthermore, the inclusion of the coparenting measure contributes to the  
20 326 explanation of children's psychological health in different family types. We do, however,  
21 327 acknowledge that our assessment of coparenting quality was a modified tool of four items,  
22 328 inspired by McHale et al. (2000). The scale was adapted to a community health care setting  
23 329 where survey items needed to be related to child wellbeing, suitable for discussion with the  
24 330 CHC nurse and possible for parents to complete together as well as individually. The four  
25 331 items represent the core dimensions of coparenting as stipulated by McHale and  
26 332 Feinberg.(21,32) Three of the items relate to aspects of the parental relationship that are  
27 333 important for children's feelings of security and cohesion; ability to cooperate, support each  
28 334 other, and confide in/trust each other. The fourth item address parents' conflict over the child,  
29 335 which instead disrupts children's security if it is intense or ongoing. Another issue with our  
30 336 measure is that we may not capture the whole variance, as most families score rather high on  
31 337 the measure, which may be related to self-serving bias due to the lack of anonymity. Parents  
32 338 who do not wish to discuss their coparenting relationship with the CHC nurse may be inclined  
33 339 to report high coparenting quality while those who are dissatisfied with the relationship  
34 340 instead may tend to score low. We acknowledge that the measure thus needs further  
35 341 validation. Even so, factor analysis suggested that the internal validity was good. More  
36 342 parents in the intact family settings assessed coparenting quality together, whereas one parent  
37 343 more often assessed coparenting in the non-intact families. To address this issue, we adjusted  
38 344 for whether the respondent was the father or mother or both parents. Finally, we successfully  
39 345 recruited a high percentage of the children in the general population to the study (67%),  
40  
41  
42  
43  
44  
45  
46  
47  
48  
49  
50  
51  
52  
53  
54  
55  
56  
57  
58  
59  
60

1  
2  
3 346 though we were not able to examine the differences between those who did and did not  
4  
5 347 participate.

6 348

7  
8 349 It is important to note that the relation between children's mental health problems and  
9  
10 350 coparenting quality is not causal. Having a toddler with behavioural problems may impact the  
11  
12 351 coparenting relationship and parents' perceptions of their children's mental health may be  
13  
14 352 influenced by their common abilities to handle the child. Further longitudinal studies are  
15  
16 353 needed to determine the direction of this relation. Also, regarding causality, there is no  
17  
18 354 information in this study about what factors lead to better or worse coparenting quality.  
19  
20 355 Sharing parental responsibilities has previously been shown to be associated with reduced  
21  
22 356 workload (33), more time for leisure activities (34), and improved communication between  
23  
24 357 parents.(33, 35)

25 358

26 359 The results of this study show considerable differences in maternal education between living  
27  
28 360 arrangements, with more mothers in intact families having a university degree versus  
29  
30 361 separated mothers. There were high numbers of data missing on other potentially important  
31  
32 362 socioeconomic covariates. Socioeconomic as well as other selection factors that were not  
33  
34 363 included in our analysis, such as parent mental health and addictive problems, may hence  
35  
36 364 cause residual confounding in the comparison between family types.

36 365

### 37 366 **Implications**

38  
39 367 This study does not support claims that JPC is psychologically harmful for preschool children  
40  
41 368 in general. Our results rather indicate that the promotion of coparenting quality should be  
42  
43 369 emphasized in policy and prevention of mental health for young children living with both  
44  
45 370 parents as well as after parental separation. For children living mostly or only with one parent,  
46  
47 371 interventions that focus on parenting skills and positive parenting behaviours should be given  
48  
49 372 priority.

50 373

### 51 374 **Conclusion**

52  
53 375 This study shows that coparenting quality may explain a large part of the differences in child  
54  
55 376 psychological problems between young children in different living arrangements, and  
56  
57 377 explains more than the actual living arrangement. This construct seems to be of importance  
58  
59 378 for early mental health problems, particularly because coparenting quality is a health

1  
2  
3 379 determinant that clinicians and social workers can target with interventions, regardless of the  
4  
5 380 family situation.

6 381

## 8 382 **FUNDING**

10 383 This research was funded by The Wallenberg foundation (AH; Nr not applicable) and Forte  
11 384 (MB and EF; Dnr 2014-0843).

13 385

## 15 386 **CONFLICTS OF INTEREST**

17 387 None declared.

18 388

## 20 389 **CONTRIBUTORS**

22 390 MB, EF and AH initiated and funded this study and created the framework for the data  
23 391 collection and analysis together with KB. KB supervised the data collection and prepared the  
24 392 collected data for analysis. RS designed and performed all statistical analyses and wrote the  
25 393 first draft of the manuscript together with MB. All authors revised the draft and have  
26 394 approved of the final version.

30 395

## 32 396 **ACKNOWLEDGEMENTS**

34 397 Thanks to nurses at the Stockholm child health care centres and to the families that  
35 398 participated in this research project.

37 399

## 39 400 **REFERENCES**

- 41 401 1 Weitoft GR, Hjern A, Haglund B, et al. Mortality, severe morbidity, and injury in  
42 402 children living with single parents in Sweden: a population-based study. *The Lancet*  
43 403 2003;361(9354):289-95.
- 46 404 2 Bergström M, Fransson E, Modin B, et al. Fifty moves a year: is there an association  
47 405 between joint physical custody and psychosomatic problems in children? *J Epidemiol*  
48 406 *Community Health* 2015;69(8):769-74.
- 51 407 3 Swedish Government Official Report. 2011:51 Fortsatt föräldrar - om ansvar, ekonomi  
52 408 och samarbete för barnets skull. [Continuous parenthood: about responsibilities, economy and  
53 409 cooperation for the sake of the child]. Statens offentliga utredningar. Stockholm: Fritze; 2011.
- 56 410 4 Kitterød RH, Wiik KA. Shared Residence Among Parents Living Apart in Norway. *Fam*  
57 411 *Court Rev* 2017;55(4):556-71.
- 58 412 5 Ottosen HM, Stage S. Delebørn i tal. En analyse af skilsmissebørns samvær baseret på

- 1  
2  
3 413 SFI's børneforløbsundersøgelse [Split children in numbers. An analysis of divorce child  
4 414 custody cases based on SFI's child development study]. SFI rapport - Det Nationale  
5 415 Forskningscenter for Velfærd; 2012.
- 6  
7  
8 416 6 Institut für Demoskopie Allensbach. Getrennt gemeinsam erziehen Befragung von  
9 417 Trennungseltern im Auftrag des BMFSFJ [Parenting together separately: A survey of  
10 418 separated parents for the BMFSFJ]. Allensbach on Lake Constance: 2017.
- 11  
12  
13 419 7 Institut National de la Statistique et des Études Économiques (INSEE). Structure des  
14 420 familles avec enfants [Structure of families with children]. 2015.
- 15  
16  
17 421 8 Bastaits K, Mortelmans D. Parenting as mediator between post-divorce family structure  
18 422 and children's well-being. *J Child Fam Stud* 2016;25(7):2178-88.
- 19  
20  
21 423 9 Bergström M, Modin B, Fransson E, et al. Living in two homes-a Swedish national survey  
22 424 of wellbeing in 12 and 15 year olds with joint physical custody. *BMC Public Health*  
23 425 2013;13(1):868.
- 24  
25  
26 426 10 Nielsen L. Shared Physical Custody: Summary of 40 Studies on Outcomes for Children. *J*  
27 427 *Divorce Remarriage* 2014;55(8):613-35.
- 28  
29  
30 428 11 Bergström M, Fransson E, Fabian H, et al. Preschool children living in joint physical  
31 429 custody arrangements show less psychological symptoms than those living mostly or only  
32 430 with one parent. *Acta Paediatr* 2018;107(2):294-300.
- 33  
34  
35 431 12 Bergström M, Fransson E, Wells MB, et al. Children with two homes: Psychological  
36 432 problems in relation to living arrangements in Nordic 2- to 9-year-olds. *Scand J Public Health*  
37 433 2019;47(2):137-45.
- 38  
39  
40 434 13 McIntosh J, Smyth B, Kelahar M, et al. Post-separation parenting arrangements and  
41 435 developmental outcomes for infants and children. Collected reports. Three reports prepared  
42 436 for the Australian Government Attorney-General's Department, Canberra. 2010.
- 43  
44  
45 437 14 Pruett MK, Ebling R, Insabella G. Critical aspects of parenting plans for young children:  
46 438 Interjecting data into the debate about overnights. *Fam Court Rev* 2004;42(1):39-59.
- 47  
48  
49 439 15 Tornello SL, Emery R, Rowen J, et al. Overnight custody arrangements, attachment, and  
50 440 adjustment among very young children. *J Marriage Fam* 2013;75(4):871-85.
- 51  
52  
53 441 16 Feinberg ME. Coparenting and the Transition to Parenthood: A Framework for Prevention.  
54 442 *Clin Child Fam Psychol Rev* 2002;5(3):173-95.
- 55  
56  
57 443 17 McHale JP, Irace K. Coparenting in diverse family systems. In: McHale JP, Lindahl KM,  
58 444 editors. Coparenting: A conceptual and clinical examination of family systems. Washington,  
59 445 DC, US: American Psychological Association; 2011.
- 60 446 18 Frosch CA, Mangelsdorf SC. Marital behavior, parenting behavior, and multiple reports

- 1  
2  
3 447 of preschoolers' behavior problems: Mediation or moderation? *Dev Psychol* 2001;37(4):502-  
4 448 19.
- 5  
6 449 19 Amato PR. The consequences of divorce for adults and children. *J Marriage Fam*  
7 450 2000;62(4):1269-87.
- 8  
9 451 20 Dahlberg A, Ghaderi A, Sarkadi A, et al. SDQ in the hands of fathers and preschool  
10 452 teachers—Psychometric properties in a non-clinical sample of 3–5-year-olds. *Child*  
11 453 *Psychiatry Hum Dev* 2019;50(1):132-41.
- 12  
13 454 21 McHale JP, Kuersten-Hogan R, Lauretti A, et al. Parental reports of coparenting  
14 455 and observed coparenting behavior during the toddler period. *J Fam Psychol* 2000;14(2):220-  
15 456 36.
- 16  
17 457 22 Nilsen SA, Breivik K, Wold B, et al. Divorce and Family Structure in Norway:  
18 458 Associations With Adolescent Mental Health. *J Divorce Remarriage* 2018;59(3):175-94.
- 19  
20 459 23 Bergström M, Fransson E, Hjern A, et al. Mental health in Swedish children  
21 460 living in joint physical custody and their parents' life satisfaction: A cross-sectional study.  
22 461 *Scand J Psychol* 2014;55(5):433-9.
- 23  
24 462 24 Schoppe-Sullivan SJ, Weldon AH, Claire Cook J, et al. Coparenting behavior moderates  
25 463 longitudinal relations between effortful control and preschool children's externalizing  
26 464 behavior. *J Child Psychol Psychiatry* 2009;50(6):698-706.
- 27  
28 465 25 Lamela D, Figueiredo B. Coparenting after marital dissolution and children's mental  
29 466 health: a systematic review. *J Pediatr (Rio J)* 2016;92:331-42.
- 30  
31 467 26 Gähler M. Self-reported Psychological Well-being among Adult Children of Divorce in  
32 468 Sweden. *Acta Sociol* 1998;41(2-3):209-25.
- 33  
34 469 27 Gähler M, Garriga A. Has the Association Between Parental Divorce and Young Adults'  
35 470 Psychological Problems Changed Over Time? Evidence From Sweden, 1968-2000. *J Fam*  
36 471 *Issues* 2013;34(6):784-808.
- 37  
38 472 28 Panter-Brick C, Burgess A, Eggerman M, et al. Practitioner review: Engaging fathers –  
39 473 recommendations for a game change in parenting interventions based on a systematic review  
40 474 of the global evidence. *J Child Psychol Psychiatry* 2014;55(11):1187-212.
- 41  
42 475 29 Pinquart M, Teubert D. Effects of parenting education with expectant and new parents:  
43 476 a meta-analysis. *J Fam Psychol* 2010;24(3):316-27.
- 44  
45 477 30 Feinberg ME, Kan ML. Establishing family foundations: intervention effects on  
46 478 coparenting, parent/infant well-being, and parent-child relations. *J Fam Psychol*  
47 479 2008;22(2):253-63.
- 48  
49  
50  
51  
52  
53  
54  
55  
56  
57  
58  
59  
60

- 1  
2  
3 480 31 Doss BD, Cicila LN, Hsueh AC, et al. A randomized controlled trial of brief coparenting  
4 481 and relationship interventions during the transition to parenthood. *J Fam Psychol*  
5 482 2014;28(4):483-94.  
6  
7  
8 483 32 Feinberg ME. Coparenting and the Transition to Parenthood: A Framework for Prevention.  
9 484 *Clin Child Fam Psychol Rev* 2002;5(3):173–195.  
10  
11 485 33 Emery RE. Developmental clinical psychology and psychiatry, Vol. 14. Marriage, divorce,  
12 486 and children's adjustment. 2nd ed. Thousand Oaks, CA, US: Sage Publications, Inc.; 1999.  
13  
14 487 34 Sodermans AK, Botterman S, Havermans N, et al. Involved fathers, liberated mothers?  
15 488 Joint physical custody and the subjective well-being of divorced parents. *Soc Indic Res*  
16 489 2015;122(1):257-77.  
17  
18 490 35 Trinder L. Shared residence: A review of recent research evidence. *Child Fam Law Q*  
19 491 2010;22(4):475-98.  
20  
21  
22  
23  
24 492  
25  
26  
27  
28  
29  
30  
31  
32  
33  
34  
35  
36  
37  
38  
39  
40  
41  
42  
43  
44  
45  
46  
47  
48  
49  
50  
51  
52  
53  
54  
55  
56  
57  
58  
59  
60



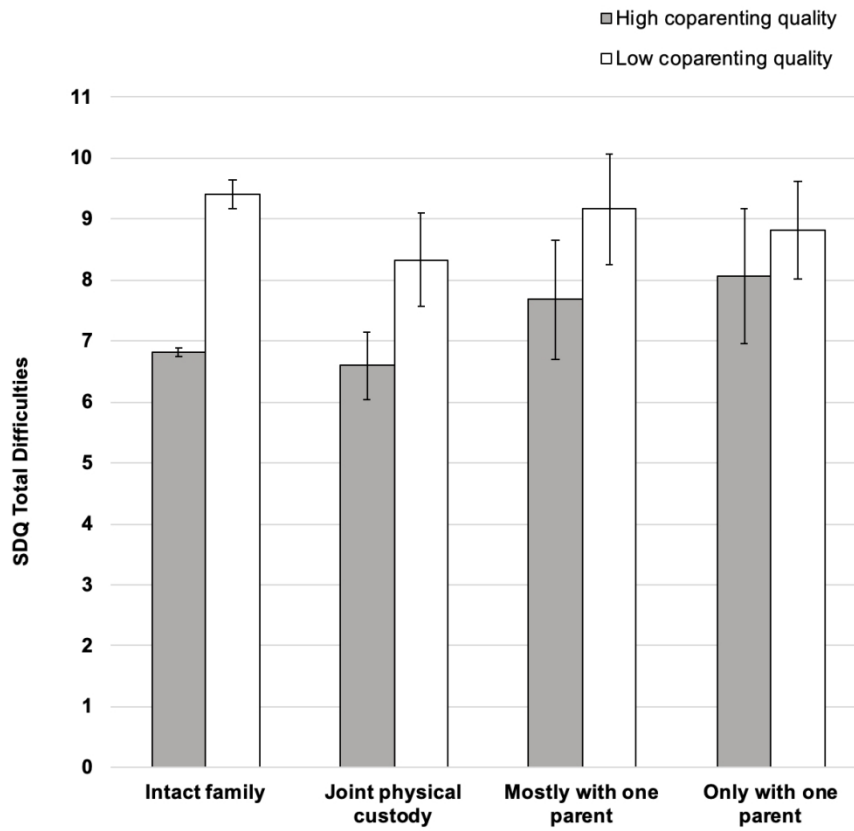

Figure 1  
 Estimated marginal means with error bars (95% confidence intervals) for children's living arrangements by coparenting quality

# BMJ Paediatrics Open

## THE IMPORTANCE OF LIVING ARRANGEMENTS AND COPARENTING QUALITY FOR YOUNG CHILDREN'S MENTAL HEALTH AFTER PARENTAL DIVORCE-A CROSS-SECTIONAL PARENTAL SURVEY

|                               |                                                                                                                                                                                                                                                                                                                                                                     |
|-------------------------------|---------------------------------------------------------------------------------------------------------------------------------------------------------------------------------------------------------------------------------------------------------------------------------------------------------------------------------------------------------------------|
| Journal:                      | <i>BMJ Paediatrics Open</i>                                                                                                                                                                                                                                                                                                                                         |
| Manuscript ID                 | bmjpo-2020-000657.R1                                                                                                                                                                                                                                                                                                                                                |
| Article Type:                 | Original research                                                                                                                                                                                                                                                                                                                                                   |
| Date Submitted by the Author: | 31-Aug-2020                                                                                                                                                                                                                                                                                                                                                         |
| Complete List of Authors:     | Bergstrom, Malin; Centre for Health Equity Studies<br>Salari, Raziye; Uppsala University, Department of public health and<br>caring sciences<br>Hjern, Anders; Centre for Health Equity Studies, ;<br>Hognäs, Robin; Stockholm University, Public Health<br>Bergqvist, Kersti; Centre for Health Equity Studies<br>Fransson, Emma; Centre for Health Equity Studies |
| Keywords:                     | Child Psychology, Comm Child Health                                                                                                                                                                                                                                                                                                                                 |
|                               |                                                                                                                                                                                                                                                                                                                                                                     |

SCHOLARONE™  
Manuscripts



I, the Submitting Author has the right to grant and does grant on behalf of all authors of the Work (as defined in the below author licence), an exclusive licence and/or a non-exclusive licence for contributions from authors who are: i) UK Crown employees; ii) where BMJ has agreed a CC-BY licence shall apply, and/or iii) in accordance with the terms applicable for US Federal Government officers or employees acting as part of their official duties; on a worldwide, perpetual, irrevocable, royalty-free basis to BMJ Publishing Group Ltd ("BMJ") its licensees and where the relevant Journal is co-owned by BMJ to the co-owners of the Journal, to publish the Work in this journal and any other BMJ products and to exploit all rights, as set out in our [licence](#).

The Submitting Author accepts and understands that any supply made under these terms is made by BMJ to the Submitting Author unless you are acting as an employee on behalf of your employer or a postgraduate student of an affiliated institution which is paying any applicable article publishing charge ("APC") for Open Access articles. Where the Submitting Author wishes to make the Work available on an Open Access basis (and intends to pay the relevant APC), the terms of reuse of such Open Access shall be governed by a Creative Commons licence – details of these licences and which [Creative Commons](#) licence will apply to this Work are set out in our licence referred to above.

Other than as permitted in any relevant BMJ Author's Self Archiving Policies, I confirm this Work has not been accepted for publication elsewhere, is not being considered for publication elsewhere and does not duplicate material already published. I confirm all authors consent to publication of this Work and authorise the granting of this licence.

1  
2  
3 1 "THE IMPORTANCE OF LIVING ARRANGEMENTS AND COPARENTING QUALITY  
4 2 FOR YOUNG CHILDREN'S MENTAL HEALTH AFTER PARENTAL DIVORCE-A  
5 3 CROSS-SECTIONAL PARENTAL SURVEY."  
6 4  
7 5  
8 6

9 6 Malin Bergström\*1,2, Raziye Salari\*3, Anders Hjern1,2, Robin Högnäs1,  
10 7 Kersti Bergqvist1, Emma Fransson1,4

11 8 \*Equal contribution

12 9 1 Centre for Health Equity Studies, Stockholm University/ Karolinska Institutet, 106 91

13 10 Stockholm, Sweden

14 11 2 Clinical Epidemiology, Department of Medicine, Karolinska Institutet, 171 77 Stockholm,  
15 12 Sweden

16 13 3 Child Health and Parenting (CHAP), Department of Public Health and Caring Sciences,  
17 14 Uppsala University, Uppsala, Sweden

18 15 4 Department of Women's and Children's Health, Uppsala University, Uppsala, Sweden

19 16  
20 17 Corresponding author: Correspondence concerning this article should be addressed to  
21 18 Anders Hjern, Centre for Health Equity Studies; Department of public health science,  
22 19 Stockholm University/ Karolinska Institutet, 106 91 Stockholm, Sweden. Email:  
23 20 [anders.hjern@chess.su.se](mailto:anders.hjern@chess.su.se).

24 21  
25 22 Word count: 3081  
26 23

27 24 **ABSTRACT**

28 25 **Background** Parental separation has been associated with adverse child mental health  
29 26 outcomes in the literature. For school aged children, joint physical custody (JPC) i.e. spending  
30 27 equal time in both parents' homes after a divorce, has been associated with better health and  
31 28 wellbeing than single care arrangements. Preschool children's wellbeing in JPC is less  
32 29 studied. The aim of this study was to investigate the association of living arrangements and  
33 30 coparenting quality with mental health in preschool children after parental separation.

34 31 **Methods** This cross-sectional population-based study includes 12,845 3-year-old children in  
35 32 Sweden. Mental health was measured by parental reports of the Strength and Difficulties  
36 33 Questionnaire (SDQ) and coparenting quality with a four-item scale. The living arrangements  
37 34 of the 642 children in non-intact families were categorized into JPC, living mostly with one  
38 35 parent and living only with one parent.

1  
2  
3 36 **Results** Linear regression models, adjusted for socio-demographic confounders, showed an  
4  
5 37 association between increased mental health problems and living mostly and only with one  
6  
7 38 parent ( $B=1.18$ ;  $CI=0.37-2.00$ , and  $B=1.20$ ;  $CI=0.40-2.00$  respectively), while children in  
8  
9 39 intact families versus JPC did not differ significantly ( $B=-0.11$ ;  $CI=-0.58-0.36$ ). After  
10  
11 40 adjusting the analyses for coparenting quality, differences in child mental health between the  
12  
13 41 post divorce living arrangements were however minimal while children in intact families had  
14  
15 42 more mental health problems compared with JPC ( $B=0.70$ ;  $CI=0.24-1.15$ ). Factorial  
16  
17 43 ANCOVA revealed that low coparenting quality was more strongly related to mental health  
18  
19 44 problems for children in intact families and JPC compared to children living mostly or only  
20  
21 45 with one parent.

22 46 **Conclusions** This study suggests that coparenting quality is a key determinant of mental  
23  
24 47 health in preschool children and thus should be targeted in preventive interventions.  
25  
26 48

27 49 **Key words** Children, Divorce, Joint physical custody, Coparenting, Parental separation,  
28  
29 50 Psychological problems  
30  
31 51

#### 32 52 **WHAT IS ALREADY KNOW ON THIS TOPIC:**

- 33 53  Parental separation is a common experience for children in high-income countries.  
34 54  Joint physical custody, where children share their time about equally between their parents'  
35 55 homes, has become an increasingly common living arrangement after parental separation.  
36 56  There is a dearth of empirical studies on child mental health in joint physical custody in the  
37 57 preschool age.  
38  
39 58

#### 40 59 **WHAT THIS STUDY HOPES TO ADD:**

- 41 60  We found similar mental health in three-year-old children in joint physical custody and  
42 61 intact families, while children living only and mostly with one parent had more mental health  
43 62 problems, net of sociodemographic characteristics.  
44 63  Once we accounted for coparenting quality, child mental health in the diverse living  
45 64 arrangements after parental divorce was very similar.  
46 65  Our results imply that coparenting is of major importance for understanding mental health  
47 66 problems that emerge early in life, and could be targeted with interventions in families with  
48 67 young children.  
49  
50 68

#### 51 69 **INTRODUCTION**

1  
2  
3 70 Around 35% of Swedish children experience parental separation before reaching the age of 18  
4  
5 71 years, and previous studies have shown that the experience of parental separation is associated  
6  
7 72 with adverse mental health outcomes in the short as well as the long term.(1, 2) During recent  
8  
9 73 decades, parenting norms have changed in the Nordic countries, and sole custody among  
10  
11 74 mothers has become less common than joint physical custody (JPC), where children share  
12  
13 75 their time about equally between their parents' respective homes.(3-5) In Sweden,  
14  
15 76 approximately 10% of all school children live in JPC arrangements.(3) JPC is also  
16  
17 77 increasingly common even in countries with more conservative family values such as  
18  
19 78 Germany and France.(6, 7)

### 20 80 **Living arrangements and child wellbeing**

21  
22 81 A growing body of research has shown that living arrangements and contact with both parents  
23  
24 82 is associated with post-divorce child wellbeing.(8) Most studies in the literature have  
25  
26 83 suggested that school-aged children and adolescents in JPC fare better on several outcomes  
27  
28 84 compared to children in single-parent arrangements.(9,10) JPC arrangements among  
29  
30 85 preschool children has been much less studied. In a recent Swedish study (11), 3- to 5-year-  
31  
32 86 olds who lived in JPC had fewer mental health problems compared to those living in single-  
33  
34 87 parent arrangements. Similar findings were reported in a Nordic study on children aged 2-9  
35  
36 88 years.(12) Studies in contexts outside of the Nordic countries have shown similar but  
37  
38 89 somewhat more diverse results.(13-15) Pruett, Ebling (14) found that overnight stays with the  
39  
40 90 second parent were associated with advantages in social functioning and fewer psychological  
41  
42 91 problems among girls. However, McIntosh and Smyth (13) found that generally the 2- to 3-  
43  
44 92 year-olds who spent 35% or more time with their second parent, experienced more problems  
45  
46 93 compared to their peers who has less contact with their second parent. Tornello, Emery (15)  
47  
48 94 did not find any significant association between custody arrangements in socially and  
49  
50 95 economically disadvantaged families and psychological problems at age 3, but nonetheless  
51  
52 96 found fewer problems among 5-year-old children who had JPC versus single-parent  
53  
54 97 arrangements at age 3.

### 53 99 **Coparenting quality and child wellbeing**

54  
55 100 High-quality coparenting has been found to contribute to a positive emotional family climate  
56  
57 101 and to affect child mental health and social adjustment positively.(16) Children whose parents  
58  
59 102 work well together in childrearing issues are typically better off during early childhood,  
60  
103 adolescence and adulthood.(17) The association between coparenting quality and child

1  
2  
3 104 wellbeing outcomes seems to be stronger than other characteristics of parental relationships,  
4  
5 105 such as intimacy and love.(18) The lower levels of health and wellbeing observed among  
6  
7 106 children with separated parents may thus hypothetically be linked to their parents' ability to  
8  
9 107 amicably share the responsibilities of childrearing.(19) It is important to highlight that  
10  
11 108 coparenting quality is a broader construct than parental conflict. Not only does coparenting  
12  
13 109 include positive measures, it is conceptually distinct from the quality of parental relationships  
14  
15 110 because it directly involves the children.(17)

15  
16 111

17 112 The aim of this study was to investigate whether mental health in 3-year-old children is  
18  
19 113 associated with their living arrangements after a parental separation, and whether parental  
20  
21 114 coparenting quality moderates this association.

22 115

## 23 116 **METHODS**

### 24 117 **Study population**

25  
26 118 The population of this study was sampled from a total population of 19,294 children in a  
27  
28 119 defined geographical area in the Stockholm county, who were invited to a routine visit at the  
29  
30 120 age of three years by the regional Preventive Child Health Care (PCHC) from December 2015  
31  
32 121 to May 2018. The PCHC is funded by regional taxes and their services are offered to all  
33  
34 122 children who reside in the county free of charge. In the invitation letter, parents were  
35  
36 123 informed about the study and that the survey would be used to individualise the visit at the  
37  
38 124 PCHC. The letter included a web-link to the survey which was only available in Swedish. The  
39  
40 125 study was approved by the Regional Ethical Review Board in Stockholm (Dnr 2015-228631)  
41  
42 126 and parents to children in the PCHC were involved in the piloting phase of this study.

43 127

44 128 In total, 13,493 surveys were submitted. Of these, 112 surveys were excluded because the  
45  
46 129 participants had reported that they were the sole parent of the child since childbirth and 32  
47  
48 130 surveys were excluded because parents had completed the survey twice for the same child.  
49  
50 131 We also excluded 504 surveys because they were completed by someone other than a parent  
51  
52 132 or because information was missing on the main variables of interest. Thus, 12,845 children  
53  
54 133 were included in the study, equivalent to a participation rate of 66.6% of the total population  
55  
56 134 of 3-year-olds in the area.

56 135

### 57 136 **Patient and Public involvement statement**

1  
2  
3 137 Parents to children in the child health services in Stockholm were involved in the piloting  
4  
5 138 phase of this study, where they provided feedback on questionnaires and the procedure in  
6  
7 139 qualitative interviews and in a quantitative evaluation in writing. We do not plan to have  
8  
9 140 parents involved in the dissemination of the results of the study.  
10  
11  
12 141  
13  
14 142

### 15 143 **Procedure**

16 144 The survey included questions on sociodemographic background, children's development,  
17 145 behaviours and symptoms, parents' worries, and coparenting quality. Parents were  
18 146 encouraged to complete the survey together.  
19  
20  
21  
22 147

### 23 148 **Measures**

24 149 *Outcome measure.* The main outcome in the study was based on parental report of the  
25 150 Swedish version of the Strengths and Difficulties Questionnaire (SDQ) which has been  
26 151 successfully validated for preschool aged children.(20) We used the total sum of scores from  
27 152 the four symptom subscales (SDQ Total Difficulties) ranging from 0 to 40.  
28  
29  
30  
31 153

32 154 *Living arrangements.* Living arrangement groups were based on parents' answers to the  
33 155 question "What does the child's family look like? The child lives with...". The options were:  
34 156 (a) intact family, (b) joint physical custody (about 50/50 in each parent's home), (c) living  
35 157 mostly with mother/father (collapsed here to living mostly with one parent), and (d) living  
36 158 only with mother/father (collapsed here to living only with one parent).  
37  
38  
39  
40  
41  
42  
43 159

44 160 *Coparenting quality.* Coparenting was measured using a four-item scale inspired by the  
45 161 coparenting scale posited by McHale and Kuersten-Hogan.(21) Parents were asked about their  
46 162 ability to cooperate, support each other, and confide in/trust each other, and the extent to  
47 163 which they experienced conflict related to their children. Items were rated on a 5-point scale  
48 164 from 1 (disagree completely) to 5 (agree completely). Higher scores indicated better  
49 165 coparenting. The scale showed good internal consistency (Cronbach's alpha = 0.79).  
50 166 Confirmatory factor analysis revealed an acceptable fit for the one factor model: comparative  
51 167 fit index (CFI) = 0.99; Tucker-Lewis index (TLI) = 0.98; root mean square error of  
52 168 approximation (RMSEA) = 0.066 (90% confidence interval = 0.056 – 0.076). For the  
53  
54  
55  
56  
57  
58  
59  
60



1  
2  
3 169 ANCOVA analyses, we used a dichotomisation where coparenting quality of 15 and below  
4 170 was considered low while coparenting quality of 16 and above was considered high. Parents  
5 171 who had chosen the option 3 (neither agree or disagree) for at least one of the four items were  
6 172 thus dichotomised as reporting low coparenting quality.  
7  
8  
9

10 173

11 174 *Background data on children and parents.* We used the following background characteristics:  
12 175 child gender (girl/boy); responding parent (categorised as mother/father/both, where both  
13 176 included a few cases of same-sex parents); mothers' and fathers' age presented as mean and  
14 177 standard deviations; mothers' and fathers' highest level of education (compulsory/high  
15 178 school/university (less than 3 years)/university (3 years or more)/not reported); and mothers'  
16 179 and fathers' country of birth (grouped as Sweden/other/not reported).  
17  
18  
19  
20  
21

22 180

### 23 181 *Statistical analyses*

24 182 The scores were scaled up pro-rata for the coparenting scale if only one item was missing, and  
25 183 for SDQ if only one or two items per subscale were missing. Hierarchical regression models  
26 184 were estimated in three steps with the SDQ total score as the outcome, living arrangements as  
27 185 the exposure variable and JPC as reference. Model 1 adjusted for child gender and whether  
28 186 the survey was filled in by the mother, father or both. Model 2 added maternal education. In  
29 187 the fully adjusted Model 3, coparenting quality as a continuous measure was added to Model  
30 188 2. To investigate the possibility that coparenting quality moderated the association between  
31 189 family type and the SDQ total score for children, we used factorial ANCOVA with children's  
32 190 living arrangement and coparenting quality (dichotomised into high and low levels) as factors  
33 191 and child gender, the survey being filled in by the mother and mother's education (at least  
34 192 three years of university education) entered as covariates.  
35  
36  
37  
38  
39  
40  
41  
42  
43  
44

45 193

## 46 194 **RESULTS**

### 47 195 **Background characteristics**

48 196 Characteristics of children and parents are presented in Table 1. About 95% of the 3-year-olds  
49 197 lived with both parents, in intact families. Children in equal JPC constituted 2.6% of the total  
50 198 sample, while 1.2% of the children lived mostly with one parent and as many lived only with  
51 199 one parent. The sample included slightly more boys than girls in all family types. In intact  
52 200 families, most parents completed the survey together, while in other family types, mothers  
53 201 often completed the survey alone. Separated mothers were slightly younger than those in  
54 202 intact families and fathers in single care families were younger than fathers in the other family  
55  
56  
57  
58  
59  
60

1  
2  
3 203 types. A university-level education of at least three years was most common for mothers and  
4 204 fathers in intact families and least common in families where the child only lived with one  
5 205 parent. More children to parents born outside of Sweden lived only with one parent compared  
6 206 with JPC. Data on father's educational level as well as on parents' country of birth was  
7 207 missing for a large part of the sample. Low coparenting quality was more common among  
8 208 parents who did not live together and in particular in families where the child only lived with  
9 209 one parent.  
10  
11  
12  
13  
14  
15  
16  
17  
18  
19  
20  
21  
22  
23  
24  
25  
26  
27  
28  
29  
30  
31  
32  
33  
34  
35  
36  
37  
38  
39  
40  
41  
42  
43  
44  
45  
46  
47  
48  
49  
50  
51  
52  
53  
54  
55  
56  
57  
58  
59  
60

Table 1. Characteristics of children and parents in different living arrangements

|                                           | Children's living arrangements |      |               |      |                        |      |                        |      |                      |      |
|-------------------------------------------|--------------------------------|------|---------------|------|------------------------|------|------------------------|------|----------------------|------|
|                                           | Total sample                   |      | Intact family |      | Joint physical custody |      | Mostly with one parent |      | Only with one parent |      |
|                                           | (n=12845)                      |      | (n=12203)     |      | (n=332)                |      | (n=151)                |      | (n=159)              |      |
| <b>Sociodemographic variables</b>         | n                              | %    | n             | %    | n                      | %    | n                      | %    | n                    | %    |
| <b>Child gender</b>                       |                                |      |               |      |                        |      |                        |      |                      |      |
| Girl                                      | 6220                           | 48.1 | 5903          | 48.0 | 163                    | 48.5 | 75                     | 49.7 | 79                   | 49.1 |
| Boy                                       | 6641                           | 51.3 | 6313          | 51.4 | 171                    | 50.9 | 76                     | 50.3 | 81                   | 50.3 |
| Not reported                              | 76                             | 0.6  | 73            | 0.6  | 2                      | 0.6  | 0                      | 0.0  | 1                    | 0.6  |
| <b>Responding parent</b>                  |                                |      |               |      |                        |      |                        |      |                      |      |
| Female (mother)                           | 5342                           | 41.3 | 4873          | 39.7 | 201                    | 59.8 | 126                    | 83.4 | 142                  | 88.2 |
| Male (father)                             | 1058                           | 8.2  | 968           | 7.9  | 73                     | 21.7 | 12                     | 7.9  | 5                    | 3.1  |
| Two parents together <sup>a</sup>         | 6519                           | 50.4 | 6433          | 52.3 | 60                     | 17.9 | 13                     | 8.6  | 13                   | 8.1  |
| Not reported                              | 18                             | 0.1  | 15            | 0.1  | 2                      | 0.6  | 0                      | 0.0  | 1                    | 0.6  |
| <b>Mother age (mean, SD) <sup>b</sup></b> | 35.39                          | 4.66 | 35.47         | 4.58 | 34.18                  | 5.06 | 33.99                  | 6.26 | 32.84                | 6.49 |
| <b>Father age (mean, SD) <sup>c</sup></b> | 37.60                          | 5.48 | 37.64         | 5.46 | 36.05                  | 5.56 | 37.85                  | 4.42 | 33.56                | 9.00 |
| <b>Mother highest level of education</b>  |                                |      |               |      |                        |      |                        |      |                      |      |
| Compulsory                                | 203                            | 1.6  | 168           | 1.4  | 15                     | 4.5  | 7                      | 4.6  | 13                   | 8.2  |
| High school                               | 2751                           | 21.4 | 2528          | 20.7 | 85                     | 25.6 | 65                     | 43.0 | 73                   | 45.9 |
| University less than 3 years              | 1307                           | 10.2 | 1238          | 10.1 | 35                     | 10.5 | 16                     | 10.6 | 18                   | 11.3 |
| University more than 3 years              | 7284                           | 56.7 | 7075          | 58.0 | 115                    | 34.6 | 49                     | 32.5 | 45                   | 28.3 |
| Not reported                              | 1300                           | 10.1 | 1194          | 9.8  | 82                     | 24.7 | 14                     | 9.3  | 10                   | 6.3  |
| <b>Father highest level of education</b>  |                                |      |               |      |                        |      |                        |      |                      |      |
| Compulsory                                | 172                            | 1.3  | 161           | 1.3  | 4                      | 1.2  | 3                      | 2.0  | 4                    | 2.5  |
| High school                               | 2046                           | 15.9 | 1984          | 16.3 | 52                     | 15.7 | 5                      | 3.3  | 5                    | 3.1  |
| University less than 3 years              | 902                            | 7.0  | 879           | 7.2  | 17                     | 5.1  | 6                      | 4.0  | 0                    | 0.0  |
| University more than 3 years              | 4166                           | 32.4 | 4098          | 33.6 | 55                     | 16.6 | 8                      | 5.3  | 5                    | 3.1  |
| Not reported                              | 5559                           | 43.3 | 5081          | 41.6 | 204                    | 61.4 | 129                    | 85.4 | 145                  | 91.2 |
| <b>Mother country of birth</b>            |                                |      |               |      |                        |      |                        |      |                      |      |
| Sweden                                    | 7051                           | 54.9 | 6716          | 55.0 | 171                    | 51.5 | 81                     | 53.6 | 83                   | 52.2 |
| Other                                     | 1440                           | 11.2 | 1383          | 11.3 | 18                     | 5.4  | 13                     | 8.6  | 26                   | 16.4 |
| Not reported                              | 4354                           | 33.9 | 4104          | 33.6 | 143                    | 43.1 | 57                     | 37.7 | 50                   | 31.4 |
| <b>Father country of birth</b>            |                                |      |               |      |                        |      |                        |      |                      |      |
| Sweden                                    | 4484                           | 34.9 | 4374          | 35.8 | 89                     | 26.8 | 14                     | 9.3  | 7                    | 4.4  |
| Other                                     | 872                            | 6.8  | 853           | 7.0  | 9                      | 2.7  | 2                      | 1.3  | 8                    | 5.0  |
| Not reported                              | 7489                           | 58.3 | 6976          | 57.2 | 234                    | 70.5 | 135                    | 89.4 | 144                  | 90.6 |
| <b>Coparenting quality</b>                |                                |      |               |      |                        |      |                        |      |                      |      |
| High                                      | 11314                          | 88.1 | 10972         | 89.9 | 218                    | 65.7 | 70                     | 46.4 | 54                   | 34.0 |
| Low                                       | 1531                           | 11.9 | 1231          | 10.1 | 114                    | 34.3 | 81                     | 53.6 | 105                  | 66.0 |

<sup>a</sup> Includes some same sex parents, <sup>b</sup> n = 9,028, <sup>c</sup> n = 5,697

210

211

212

### 213 **Child mental health in relation to background characteristics**

214 Mental health problems according to SDQ for children in different family types are reported  
 215 in Table 2. Fewer problems were reported for children in intact families followed by children  
 216 in JPC. Children living mostly or only with one parent had more mental health problems.  
 217 Boys had more problems compared with girls and children of mothers with high educational  
 218 levels suffered from less problems compared with those with less educated mothers.

219

Table 2. Mean values and standard deviations of the SDQ in relation to sociodemographic variables

|                                          | SDQ Total score |      |      |
|------------------------------------------|-----------------|------|------|
|                                          | <i>n</i>        | Mean | SD   |
| <b>Living arrangement</b>                |                 |      |      |
| Intact family                            | 12203           | 7.07 | 4.23 |
| Joint physical custody                   | 332             | 7.26 | 4.50 |
| Mostly with one parent                   | 151             | 8.45 | 5.28 |
| Only with one parent                     | 159             | 8.55 | 5.32 |
| <b>Child gender</b>                      |                 |      |      |
| Girl                                     | 6213            | 6.70 | 4.10 |
| Boy                                      | 6632            | 7.50 | 4.39 |
| <b>Responding parent</b>                 |                 |      |      |
| Female (mother)                          | 5315            | 6.95 | 4.26 |
| Male (father)                            | 1052            | 7.30 | 4.34 |
| Two parents together <sup>a</sup>        | 6478            | 7.21 | 4.27 |
| <b>Mother highest level of education</b> |                 |      |      |
| Compulsory                               | 203             | 8.72 | 5.56 |
| High school                              | 2751            | 7.67 | 4.53 |
| University less than 3 years             | 1307            | 7.31 | 4.31 |
| University more than 3 years             | 7284            | 6.77 | 4.04 |
| Not reported                             | 1300            | 7.41 | 4.45 |

220 <sup>a</sup> Includes some same sex parents

221

### 222 **Multivariate modelling**

223 Table 3 shows the results from linear regression models, which suggest that children living  
 224 mostly or only with one parent, compared with those in JPC, had more mental health  
 225 problems. However, children in intact families were not significantly different from those in  
 226 JPC in terms of mental health. When sociodemographic variables were adjusted for, in Model  
 227 2, the differences between those living only and mostly with one parent and those in JPC were

228 attenuated. Coefficients remained significant, however, indicating that only some of the  
 229 differences were explained by the background characteristics. In Model 3, after including  
 230 coparenting quality, the differences between those living only and mostly with one parent and  
 231 in JPC were no longer significant. Instead, differences between children in intact families and  
 232 JPC became significant suggesting that children living in JPC showed fewer problems  
 233 compared to children in intact families after controlling for coparenting quality.

234  
 235

Table 3. Linear regression models of parental reports of the SDQ Total Difficulties by living arrangement, sociodemographic variables and coparenting quality (n=12,845)

|                                            | Model 1 |        |      |       | Model 2 |        |      |       | Model 3 |        |      |       |
|--------------------------------------------|---------|--------|------|-------|---------|--------|------|-------|---------|--------|------|-------|
|                                            | B       | 95% CI |      | p     | B       | 95% CI |      | p     | B       | 95% CI |      | p     |
| <b>Living arrangement</b>                  |         |        |      |       |         |        |      |       |         |        |      |       |
| Joint physical custody                     | Ref     |        |      |       | Ref     |        |      |       | Ref     |        |      |       |
| Intact family                              | -0.26   | -0.72  | 0.21 | 0.283 | -0.11   | -0.58  | 0.36 | 0.643 | 0.70*   | 0.24   | 1.15 | 0.003 |
| Living mostly with one parent              | 1.27*   | 0.45   | 2.09 | 0.002 | 1.18*   | 0.37   | 2.00 | 0.004 | 0.14    | -0.66  | 0.93 | 0.735 |
| Living only with one parent                | 1.38*   | 0.58   | 2.19 | 0.001 | 1.20*   | 0.40   | 2.00 | 0.003 | -0.25   | -1.03  | 0.54 | 0.537 |
| <b>Child gender</b>                        |         |        |      |       |         |        |      |       |         |        |      |       |
| Girl                                       | Ref     |        |      |       | Ref     |        |      |       | Ref     |        |      |       |
| Boy                                        | 0.78*   | 0.64   | 0.93 | 0.000 | 0.78*   | 0.63   | 0.93 | 0.000 | 0.74*   | 0.60   | 0.88 | 0.000 |
| <b>Respondent</b>                          |         |        |      |       |         |        |      |       |         |        |      |       |
| Female (mother)                            | Ref     |        |      |       | Ref     |        |      |       | Ref     |        |      |       |
| Male (father)                              | 0.34*   | 0.06   | 0.62 | 0.019 | -0.37   | -0.96  | 0.22 | 0.220 | -0.38   | -0.95  | 0.20 | 0.199 |
| Two parents together a                     | 0.31*   | 0.16   | 0.47 | 0.000 | 0.37*   | 0.21   | 0.53 | 0.000 | 0.60*   | 0.45   | 0.75 | 0.000 |
| <b>Mother's highest level of education</b> |         |        |      |       |         |        |      |       |         |        |      |       |
| University (3 years or more)               |         |        |      |       | Ref     |        |      |       | Ref     |        |      |       |
| Compulsory                                 |         |        |      |       | 1.92*   | 1.32   | 2.51 | 0.000 | 1.99*   | 1.42   | 2.57 | 0.000 |
| High school                                |         |        |      |       | 0.88*   | 0.69   | 1.07 | 0.000 | 0.80*   | 0.62   | 0.98 | 0.000 |
| University (less than 3 years)             |         |        |      |       | 0.56*   | 0.32   | 0.81 | 0.000 | 0.52*   | 0.28   | 0.76 | 0.000 |
| Not reported                               |         |        |      |       | 1.07*   | 0.53   | 1.60 | 0.000 | 1.06*   | 0.54   | 1.58 | 0.000 |
| <b>Coparenting quality</b>                 |         |        |      |       |         |        |      |       |         |        |      |       |
| -0.45* -0.48 -0.42 0.000                   |         |        |      |       |         |        |      |       |         |        |      |       |

236 <sup>a</sup> Includes some same sex parents

237 \*  $P < .05$

238  
 239

240

241 -----Figure 1 in about here-----

## 242 Factorial ANCOVA

243 The factorial ANCOVA analysis revealed a significant interaction effect for children's living  
 244 arrangement by coparenting quality  $F(3, 12\ 834) = 3.770, p < .01$ . Post hoc comparisons

1  
2  
3 245 yielded no significant differences between children's living arrangement, while low  
4  
5 246 coparenting quality was associated with more mental health problems. As shown in Figure 1,  
6  
7 247 high quality coparenting was strongly associated with fewer mental health problems for  
8  
9 248 children living in intact families and joint physical custody. For children living mostly or only  
10  
11 249 with one parent this difference was smaller and not statistically significant at the  $p < 0.05$  level.  
12  
13 250 In addition, children living in JPC fared better than children in intact families when  
14  
15 251 coparenting quality was low.

15 252

### 17 253 **Sensitivity analyses**

18  
19 254 As sensitivity analyses, we used multiple imputation (MI) to impute missing values on SDQ  
20  
21 255 and coparenting scale (imputed at item level), as well as mother education (compulsory and  
22  
23 256 high school had to be combined to run the MI). The regression analyses and estimated  
24  
25 257 marginal means in the ANCOVA model revealed the same pattern of results (not shown).

25 258

## 27 259 **DISCUSSION**

28  
29 260 This cross-sectional study of 12,845 3-year-olds in Stockholm, demonstrated very similar  
30  
31 261 mental health outcomes in children in JPC after parental separation compared with children in  
32  
33 262 intact families, while children living mostly and only with one parent had more mental health  
34  
35 263 problems, net of sociodemographic characteristics. These findings are consistent with another  
36  
37 264 Swedish cohort of 3- to 5-year-olds (11) and studies on older children in the Nordic  
38  
39 265 countries.(e.g., 12, 22, 23) The addition of coparenting quality in the analyses, however,  
40  
41 266 changed the picture of how children's mental health is related to family type.

41 267

### 43 268 **The findings in relation to coparenting quality**

44  
45 269 Regardless of family type, children with parents with low quality coparenting relationships  
46  
47 270 had more mental health problems than their counterparts in families where parents reported  
48  
49 271 high coparenting quality. Schoppe-Sullivan & Weldon (24) have previously shown that  
50  
51 272 coparenting quality may moderate the association between children's socioemotional  
52  
53 273 development (such as self-control) and later externalizing behaviours. The impact of parental  
54  
55 274 conflict on children's wellbeing is well established in the literature.(19) A systematic review  
56  
57 275 has previously concluded that coparenting is a key mechanism within the family system for  
58  
59 276 child mental health outcomes following divorce.(25) The results of our study suggest that  
60  
277 coparenting quality is a determinant of children's mental health symptoms not only among  
278  
279 278 children with separated or divorced parents, but in particular for those in intact families. Our

1  
2  
3 279 study, hence, extends this literature by providing evidence that coparenting quality may be  
4  
5 280 more important for young children's mental health than their family form per se.

6 281  
7  
8 282 Coparenting quality differed between parents in different post-divorce family types and  
9  
10 283 among those still cohabiting, which may explain differences in how children fare across  
11  
12 284 family forms. An interesting finding was that fewer child mental health problems were  
13  
14 285 reported in low coparenting quality families when parents shared custody in two separate  
15  
16 286 homes than as an intact family. Indeed, prior research has found similar patterns related to  
17  
18 287 parental conflict. In a longitudinal Swedish study, adults who had grown up in intact families  
19  
20 288 characterized by serious disagreement, reported the lowest level of psychological wellbeing,  
21  
22 289 followed by those who had experienced parental conflict and parental divorce.(26) Similarly,  
23  
24 290 another Swedish study found that children who grew up with divorced parents had poorer  
25  
26 291 psychological health as young adults, but parental conflict and economic hardship during  
27  
28 292 childhood attenuated the association.(27)

29 293  
30 294 Coparenting quality played a lesser role for children living mostly or only with one parent. It  
31  
32 295 seems plausible that coparenting quality affects children less when one parent is the primary  
33  
34 296 care giver and the need for cooperation between the parents is, thus, limited. Parenting quality  
35  
36 297 of the primary care giver may, for these children, be of greater importance.

37 298  
38 299 Currently, parenting interventions mainly focus on improving the quality of parenting  
39  
40 300 children receive and primarily target mothers.(28) Unfortunately, positive effects of such  
41  
42 301 programs have not been extended to coparenting quality.(29) Our results suggest that  
43  
44 302 coparenting skills may be an important and distinct dimension that should be given more  
45  
46 303 attention in parenting interventions and that such programs should be evaluated in terms of  
47  
48 304 their impact on child wellbeing and mental health.(30, 31)

49 305  
50 306 We have previously discussed whether children's wellbeing related to custody arrangements  
51  
52 307 may be explained by socioeconomic status, by an increased closeness to the father in JPC, or  
53  
54 308 by whether children experience a loss of social and economic resources. Earlier studies show  
55  
56 309 that although these factors contributed to children's wellbeing, adjusting for them did not  
57  
58 310 eliminate the differences in wellbeing between children living in different family types.(2, 9,  
59  
60 311 11, 12, 23) By exploring the interaction between coparenting quality and family types, we  
312 may capture a large proportion of the unmeasured variance; these are differences between

1  
2  
3 313 groups that have been unexplained in previous studies. The current study did not, however,  
4 314 address the potential interaction between good/poor parenting quality and children's  
5 315 temperaments. Schoppe-Sullivan & Weldon (24) showed that children with low self-control  
6 316 (low on the effortful control temperament scale) were helped by a supporting coparenting  
7 317 environment. In this context, the risk of negative behaviours that typically follow such  
8 318 temperament was attenuated.

9  
10  
11  
12  
13 319

### 14 320 **Methodological considerations**

15 321 Compared to earlier studies examining JPC among very young children, this study has  
16 322 considerable advantages. First, the size of our sample of children in this living arrangement by  
17 323 far exceeds that of earlier studies. Second, these children live in about equal JPC, whereas  
18 324 JPC in other studies may be based on overnights or unequal distribution of time between the  
19 325 parents' homes. Furthermore, the inclusion of the coparenting measure contributes to the  
20 326 explanation of children's psychological health in different family types. We do, however,  
21 327 acknowledge that our assessment of coparenting quality was a modified tool of four items,  
22 328 inspired by McHale et al. (2000). The scale was adapted to a community health care setting  
23 329 where survey items needed to be related to child wellbeing, suitable for discussion with the  
24 330 CHC nurse and possible for parents to complete together as well as individually. The four  
25 331 items represent the core dimensions of coparenting as stipulated by McHale and  
26 332 Feinberg.(21,32) Three of the items relate to aspects of the parental relationship that are  
27 333 important for children's feelings of security and cohesion; ability to cooperate, support each  
28 334 other, and confide in/trust each other. The fourth item address parents' conflict over the child,  
29 335 which instead disrupts children's security if it is intense or ongoing. Another issue with our  
30 336 measure is that we may not capture the whole variance, as most families score rather high on  
31 337 the measure, which may be related to self-serving bias due to the lack of anonymity. Parents  
32 338 who do not wish to discuss their coparenting relationship with the CHC nurse may be inclined  
33 339 to report high coparenting quality while those who are dissatisfied with the relationship  
34 340 instead may tend to score low. We acknowledge that the measure thus needs further  
35 341 validation. Even so, factor analysis suggested that the internal validity was good. More  
36 342 parents in the intact family settings assessed coparenting quality together, whereas one parent  
37 343 more often assessed coparenting in the non-intact families. To address this issue, we adjusted  
38 344 for whether the respondent was the father or mother or both parents. Finally, we successfully  
39 345 recruited a high percentage of the children in the general population to the study (67%),  
40  
41  
42  
43  
44  
45  
46  
47  
48  
49  
50  
51  
52  
53  
54  
55  
56  
57  
58  
59  
60



1  
2  
3 346 though we were not able to examine the differences between those who did and did not  
4  
5 347 participate.

6 348

7  
8 349 It is important to note that the relation between children's mental health problems and  
9  
10 350 coparenting quality is not causal. Having a toddler with behavioural problems may impact the  
11  
12 351 coparenting relationship and parents' perceptions of their children's mental health may be  
13  
14 352 influenced by their common abilities to handle the child. Further longitudinal studies are  
15  
16 353 needed to determine the direction of this relation. Also, regarding causality, there is no  
17  
18 354 information in this study about what factors lead to better or worse coparenting quality.  
19  
20 355 Sharing parental responsibilities has previously been shown to be associated with reduced  
21  
22 356 workload (33), more time for leisure activities (34), and improved communication between  
23  
24 357 parents.(33, 35)

25 358

26 359 The results of this study show considerable differences in maternal education between living  
27  
28 360 arrangements, with more mothers in intact families having a university degree versus  
29  
30 361 separated mothers. There were high numbers of data missing on other potentially important  
31  
32 362 socioeconomic covariates. Socioeconomic as well as other selection factors that were not  
33  
34 363 included in our analysis, such as parent mental health and addictive problems, may hence  
35  
36 364 cause residual confounding in the comparison between family types.

36 365

### 37 366 **Implications**

38  
39 367 This study does not support claims that JPC is psychologically harmful for preschool children  
40  
41 368 in general. Our results rather indicate that the promotion of coparenting quality should be  
42  
43 369 emphasized in policy and prevention of mental health for young children living with both  
44  
45 370 parents as well as after parental separation. For children living mostly or only with one parent,  
46  
47 371 interventions that focus on parenting skills and positive parenting behaviours should be given  
48  
49 372 priority.

50 373

### 51 374 **Conclusion**

52  
53 375 This study shows that coparenting quality may explain a large part of the differences in child  
54  
55 376 psychological problems between young children in different living arrangements, and  
56  
57 377 explains more than the actual living arrangement. This construct seems to be of importance  
58  
59 378 for early mental health problems, particularly because coparenting quality is a health  
60

1  
2  
3 379 determinant that clinicians and social workers can target with interventions, regardless of the  
4 380 family situation.

5 381

## 6 382 **FUNDING**

7  
8 383 This research was funded by The Wallenberg foundation (AH; Nr not applicable) and Forte  
9 384 (MB and EF; Dnr 2014-0843).

10 385

## 11 386 **CONFLICTS OF INTEREST**

12 387 None declared.

13 388

## 14 389 **CONTRIBUTORS**

15 390 MB, EF and AH initiated and funded this study and created the framework for the data  
16 391 collection and analysis together with KB. KB supervised the data collection and prepared the  
17 392 collected data for analysis. RS designed and performed all statistical analyses and wrote the  
18 393 first draft of the manuscript together with MB. All authors revised the draft and have  
19 394 approved of the final version.

20 395

## 21 396 **ACKNOWLEDGEMENTS**

22 397 Thanks to nurses at the Stockholm child health care centres and to the families that  
23 398 participated in this research project.

24 399

## 25 400 **REFERENCES**

- 26 401 1 Weitoft GR, Hjern A, Haglund B, et al. Mortality, severe morbidity, and injury in  
27 402 children living with single parents in Sweden: a population-based study. *The Lancet*  
28 403 2003;361(9354):289-95.
- 29 404 2 Bergström M, Fransson E, Modin B, et al. Fifty moves a year: is there an association  
30 405 between joint physical custody and psychosomatic problems in children? *J Epidemiol*  
31 406 *Community Health* 2015;69(8):769-74.
- 32 407 3 Swedish Government Official Report. 2011:51 Fortsatt föräldrar - om ansvar, ekonomi  
33 408 och samarbete för barnets skull. [Continuous parenthood: about responsibilities, economy and  
34 409 cooperation for the sake of the child]. Statens offentliga utredningar. Stockholm: Fritze; 2011.
- 35 410 4 Kitterød RH, Wiik KA. Shared Residence Among Parents Living Apart in Norway. *Fam*  
36 411 *Court Rev* 2017;55(4):556-71.
- 37 412 5 Ottosen HM, Stage S. Delebørn i tal. En analyse af skilsmissebørns samvær baseret på

- 1  
2  
3 413 SFI's børneforløbsundersøgelse [Split children in numbers. An analysis of divorce child  
4 414 custody cases based on SFI's child development study]. SFI rapport - Det Nationale  
5 415 Forskningscenter for Velfærd; 2012.
- 6  
7  
8 416 6 Institut für Demoskopie Allensbach. Getrennt gemeinsam erziehen Befragung von  
9 417 Trennungseltern im Auftrag des BMFSFJ [Parenting together separately: A survey of  
10 418 separated parents for the BMFSFJ]. Allensbach on Lake Constance: 2017.
- 11  
12  
13 419 7 Institut National de la Statistique et des Études Économiques (INSEE). Structure des  
14 420 familles avec enfants [Structure of families with children]. 2015.
- 15  
16  
17 421 8 Bastaits K, Mortelmans D. Parenting as mediator between post-divorce family structure  
18 422 and children's well-being. *J Child Fam Stud* 2016;25(7):2178-88.
- 19  
20  
21 423 9 Bergström M, Modin B, Fransson E, et al. Living in two homes-a Swedish national survey  
22 424 of wellbeing in 12 and 15 year olds with joint physical custody. *BMC Public Health*  
23 425 2013;13(1):868.
- 24  
25  
26 426 10 Nielsen L. Shared Physical Custody: Summary of 40 Studies on Outcomes for Children. *J*  
27 427 *Divorce Remarriage* 2014;55(8):613-35.
- 28  
29  
30 428 11 Bergström M, Fransson E, Fabian H, et al. Preschool children living in joint physical  
31 429 custody arrangements show less psychological symptoms than those living mostly or only  
32 430 with one parent. *Acta Paediatr* 2018;107(2):294-300.
- 33  
34  
35 431 12 Bergström M, Fransson E, Wells MB, et al. Children with two homes: Psychological  
36 432 problems in relation to living arrangements in Nordic 2- to 9-year-olds. *Scand J Public Health*  
37 433 2019;47(2):137-45.
- 38  
39  
40 434 13 McIntosh J, Smyth B, Kelahar M, et al. Post-separation parenting arrangements and  
41 435 developmental outcomes for infants and children. Collected reports. Three reports prepared  
42 436 for the Australian Government Attorney-General's Department, Canberra. 2010.
- 43  
44  
45 437 14 Pruett MK, Ebling R, Insabella G. Critical aspects of parenting plans for young children:  
46 438 Interjecting data into the debate about overnights. *Fam Court Rev* 2004;42(1):39-59.
- 47  
48  
49 439 15 Tornello SL, Emery R, Rowen J, et al. Overnight custody arrangements, attachment, and  
50 440 adjustment among very young children. *J Marriage Fam* 2013;75(4):871-85.
- 51  
52  
53 441 16 Feinberg ME. Coparenting and the Transition to Parenthood: A Framework for Prevention.  
54 442 *Clin Child Fam Psychol Rev* 2002;5(3):173-95.
- 55  
56  
57 443 17 McHale JP, Irace K. Coparenting in diverse family systems. In: McHale JP, Lindahl KM,  
58 444 editors. Coparenting: A conceptual and clinical examination of family systems. Washington,  
59 445 DC, US: American Psychological Association; 2011.
- 60 446 18 Frosch CA, Mangelsdorf SC. Marital behavior, parenting behavior, and multiple reports

- 1  
2  
3 447 of preschoolers' behavior problems: Mediation or moderation? *Dev Psychol* 2001;37(4):502-  
4 448 19.
- 5  
6 449 19 Amato PR. The consequences of divorce for adults and children. *J Marriage Fam*  
7 450 2000;62(4):1269-87.
- 8  
9 451 20 Dahlberg A, Ghaderi A, Sarkadi A, et al. SDQ in the hands of fathers and preschool  
10 452 teachers—Psychometric properties in a non-clinical sample of 3–5-year-olds. *Child*  
11 453 *Psychiatry Hum Dev* 2019;50(1):132-41.
- 12  
13 454 21 McHale JP, Kuersten-Hogan R, Lauretti A, et al. Parental reports of coparenting  
14 455 and observed coparenting behavior during the toddler period. *J Fam Psychol* 2000;14(2):220-  
15 456 36.
- 16  
17 457 22 Nilsen SA, Breivik K, Wold B, et al. Divorce and Family Structure in Norway:  
18 458 Associations With Adolescent Mental Health. *J Divorce Remarriage* 2018;59(3):175-94.
- 19  
20 459 23 Bergström M, Fransson E, Hjern A, et al. Mental health in Swedish children  
21 460 living in joint physical custody and their parents' life satisfaction: A cross-sectional study.  
22 461 *Scand J Psychol* 2014;55(5):433-9.
- 23  
24 462 24 Schoppe-Sullivan SJ, Weldon AH, Claire Cook J, et al. Coparenting behavior moderates  
25 463 longitudinal relations between effortful control and preschool children's externalizing  
26 464 behavior. *J Child Psychol Psychiatry* 2009;50(6):698-706.
- 27  
28 465 25 Lamela D, Figueiredo B. Coparenting after marital dissolution and children's mental  
29 466 health: a systematic review. *J Pediatr (Rio J)* 2016;92:331-42.
- 30  
31 467 26 Gähler M. Self-reported Psychological Well-being among Adult Children of Divorce in  
32 468 Sweden. *Acta Sociol* 1998;41(2-3):209-25.
- 33  
34 469 27 Gähler M, Garriga A. Has the Association Between Parental Divorce and Young Adults'  
35 470 Psychological Problems Changed Over Time? Evidence From Sweden, 1968-2000. *J Fam*  
36 471 *Issues* 2013;34(6):784-808.
- 37  
38 472 28 Panter-Brick C, Burgess A, Eggerman M, et al. Practitioner review: Engaging fathers –  
39 473 recommendations for a game change in parenting interventions based on a systematic review  
40 474 of the global evidence. *J Child Psychol Psychiatry* 2014;55(11):1187-212.
- 41  
42 475 29 Pinquart M, Teubert D. Effects of parenting education with expectant and new parents:  
43 476 a meta-analysis. *J Fam Psychol* 2010;24(3):316-27.
- 44  
45 477 30 Feinberg ME, Kan ML. Establishing family foundations: intervention effects on  
46 478 coparenting, parent/infant well-being, and parent-child relations. *J Fam Psychol*  
47 479 2008;22(2):253-63.
- 48  
49  
50  
51  
52  
53  
54  
55  
56  
57  
58  
59  
60

- 1  
2  
3 480 31 Doss BD, Cicila LN, Hsueh AC, et al. A randomized controlled trial of brief coparenting  
4 481 and relationship interventions during the transition to parenthood. *J Fam Psychol*  
5 482 2014;28(4):483-94.  
6  
7  
8 483 32 Feinberg ME. Coparenting and the Transition to Parenthood: A Framework for Prevention.  
9 484 *Clin Child Fam Psychol Rev* 2002;5(3):173–195.  
10  
11 485 33 Emery RE. Developmental clinical psychology and psychiatry, Vol. 14. Marriage, divorce,  
12 486 and children's adjustment. 2nd ed. Thousand Oaks, CA, US: Sage Publications, Inc.; 1999.  
13  
14 487 34 Sodermans AK, Botterman S, Havermans N, et al. Involved fathers, liberated mothers?  
15 488 Joint physical custody and the subjective well-being of divorced parents. *Soc Indic Res*  
16 489 2015;122(1):257-77.  
17  
18 490 35 Trinder L. Shared residence: A review of recent research evidence. *Child Fam Law Q*  
19 491 2010;22(4):475-98.  
20  
21  
22  
23  
24 492  
25  
26  
27  
28  
29  
30  
31  
32  
33  
34  
35  
36  
37  
38  
39  
40  
41  
42  
43  
44  
45  
46  
47  
48  
49  
50  
51  
52  
53  
54  
55  
56  
57  
58  
59  
60

1  
2  
3  
4  
5  
6  
7  
8  
9  
10  
11  
12  
13  
14  
15  
16  
17  
18  
19  
20  
21  
22  
23  
24  
25  
26  
27  
28  
29  
30  
31  
32  
33  
34  
35  
36  
37  
38  
39  
40  
41  
42  
43  
44  
45  
46  
47  
48  
49  
50  
51  
52  
53  
54  
55  
56  
57  
58  
59  
60

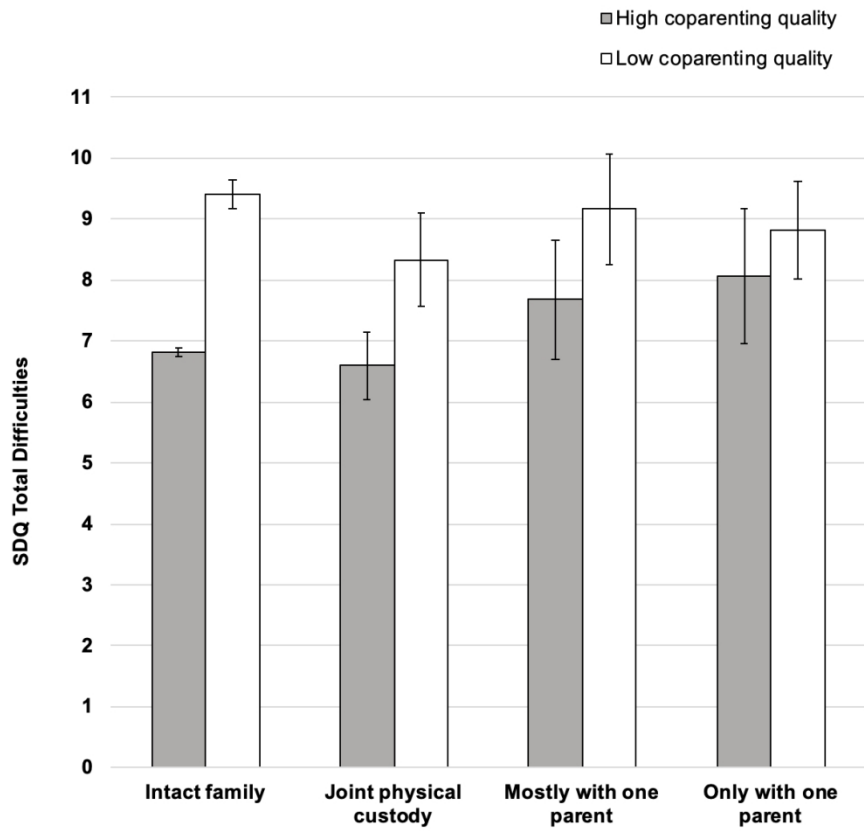

Figure 1  
Estimated marginal means with error bars (95% confidence intervals) for children's living arrangements by coparenting quality

# BMJ Paediatrics Open

## THE IMPORTANCE OF LIVING ARRANGEMENTS AND COPARENTING QUALITY FOR YOUNG CHILDREN'S MENTAL HEALTH AFTER PARENTAL DIVORCE-A CROSS-SECTIONAL PARENTAL SURVEY

|                               |                                                                                                                                                                                                                                                                                                                                                                     |
|-------------------------------|---------------------------------------------------------------------------------------------------------------------------------------------------------------------------------------------------------------------------------------------------------------------------------------------------------------------------------------------------------------------|
| Journal:                      | <i>BMJ Paediatrics Open</i>                                                                                                                                                                                                                                                                                                                                         |
| Manuscript ID                 | bmjpo-2020-000657.R3                                                                                                                                                                                                                                                                                                                                                |
| Article Type:                 | Original research                                                                                                                                                                                                                                                                                                                                                   |
| Date Submitted by the Author: | 08-Mar-2021                                                                                                                                                                                                                                                                                                                                                         |
| Complete List of Authors:     | Bergstrom, Malin; Centre for Health Equity Studies<br>Salari, Raziye; Uppsala University, Department of public health and<br>caring sciences<br>Hjern, Anders; Centre for Health Equity Studies, ;<br>Hognäs, Robin; Stockholm University, Public Health<br>Bergqvist, Kersti; Centre for Health Equity Studies<br>Fransson, Emma; Centre for Health Equity Studies |
| Keywords:                     | Child Psychology, Comm Child Health                                                                                                                                                                                                                                                                                                                                 |
|                               |                                                                                                                                                                                                                                                                                                                                                                     |

SCHOLARONE™  
Manuscripts



I, the Submitting Author has the right to grant and does grant on behalf of all authors of the Work (as defined in the below author licence), an exclusive licence and/or a non-exclusive licence for contributions from authors who are: i) UK Crown employees; ii) where BMJ has agreed a CC-BY licence shall apply, and/or iii) in accordance with the terms applicable for US Federal Government officers or employees acting as part of their official duties; on a worldwide, perpetual, irrevocable, royalty-free basis to BMJ Publishing Group Ltd ("BMJ") its licensees and where the relevant Journal is co-owned by BMJ to the co-owners of the Journal, to publish the Work in this journal and any other BMJ products and to exploit all rights, as set out in our [licence](#).

The Submitting Author accepts and understands that any supply made under these terms is made by BMJ to the Submitting Author unless you are acting as an employee on behalf of your employer or a postgraduate student of an affiliated institution which is paying any applicable article publishing charge ("APC") for Open Access articles. Where the Submitting Author wishes to make the Work available on an Open Access basis (and intends to pay the relevant APC), the terms of reuse of such Open Access shall be governed by a Creative Commons licence – details of these licences and which [Creative Commons](#) licence will apply to this Work are set out in our licence referred to above.

Other than as permitted in any relevant BMJ Author's Self Archiving Policies, I confirm this Work has not been accepted for publication elsewhere, is not being considered for publication elsewhere and does not duplicate material already published. I confirm all authors consent to publication of this Work and authorise the granting of this licence.



1  
2  
3 1 "THE IMPORTANCE OF LIVING ARRANGEMENTS AND COPARENTING QUALITY  
4 2 FOR YOUNG CHILDREN'S MENTAL HEALTH AFTER PARENTAL DIVORCE-A  
5 3 CROSS-SECTIONAL PARENTAL SURVEY."  
6 4  
7 5  
8 6

9 6 Malin Bergström\*1,2, Raziye Salari\*3, Anders Hjern1,2, Robin Högnäs1,  
10 7 Kersti Bergqvist1, Emma Fransson1,4

11 8 \*Equal contribution

12 9 1 Centre for Health Equity Studies, Stockholm University/ Karolinska Institutet, 106 91

13 10 Stockholm, Sweden

14 11 2 Clinical Epidemiology, Department of Medicine, Karolinska Institutet, 171 77 Stockholm,  
15 12 Sweden

16 13 3 Child Health and Parenting (CHAP), Department of Public Health and Caring Sciences,  
17 14 Uppsala University, Uppsala, Sweden

18 15 4 Department of Women's and Children's Health, Uppsala University, Uppsala, Sweden

19 16  
20 17 Corresponding author: Correspondence concerning this article should be addressed to  
21 18 Anders Hjern, Centre for Health Equity Studies; Department of public health science,  
22 19 Stockholm University/ Karolinska Institutet, 106 91 Stockholm, Sweden. Email:  
23 20 [anders.hjern@chess.su.se](mailto:anders.hjern@chess.su.se).

24 21  
25 22 Word count: 3081  
26 23  
27 24  
28  
29  
30  
31  
32  
33  
34  
35  
36  
37  
38  
39  
40  
41  
42  
43  
44  
45  
46  
47  
48  
49  
50  
51  
52  
53  
54  
55  
56  
57  
58  
59  
60

1  
2  
3 25 **ABSTRACT**

4 26 **Background** Parental separation has been associated with adverse child mental health  
5 27 outcomes in the literature. For school aged children, joint physical custody (JPC) i.e. spending  
6 28 equal time in both parents' homes after a divorce, has been associated with better health and  
7 29 wellbeing than single care arrangements. Preschool children's wellbeing in JPC is less  
8 30 studied. The aim of this study was to investigate the association of living arrangements and  
9 31 coparenting quality with mental health in preschool children after parental separation.

10 32 **Methods** This cross-sectional population-based study includes 12,845 3-year-old children in  
11 33 Sweden. Mental health was measured by parental reports of the Strength and Difficulties  
12 34 Questionnaire (SDQ) and coparenting quality with a four-item scale. The living arrangements  
13 35 of the 642 children in non-intact families were categorized into JPC, living mostly with one  
14 36 parent and living only with one parent.

15 37 **Results** Linear regression models, adjusted for socio-demographic confounders, showed an  
16 38 association between increased mental health problems and living mostly and only with one  
17 39 parent (B=1.18; CI=0.37-2.00, and B=1.20; CI=0.40-2.00 respectively), while children in  
18 40 intact families versus JPC did not differ significantly (B=-0.11; CI=-0.58-0.36). After  
19 41 adjusting the analyses for coparenting quality, differences in child mental health between the  
20 42 post divorce living arrangements were however minimal while children in intact families had  
21 43 more mental health problems compared with JPC (B=0.70; CI=0.24-1.15). Factorial  
22 44 ANCOVA revealed that low coparenting quality was more strongly related to mental health  
23 45 problems for children in intact families and JPC compared to children living mostly or only  
24 46 with one parent.

25 47 **Conclusions** This study suggests that coparenting quality is a key determinant of mental  
26 48 health in preschool children and thus should be targeted in preventive interventions.

27 49  
28 50 **Key words** Children, Divorce, Joint physical custody, Coparenting, Parental separation,  
29 51 Psychological problems  
30 52  
31 53  
32 54  
33 55  
34 56  
35 57  
36 58  
37 59  
38 60

1  
2  
3 54 **WHAT IS ALREADY KNOW ON THIS TOPIC:**  
4

- 5 55  Parental separation is a common experience for children in high-income countries.  
6  
7 56  Joint physical custody, where children share their time about equally between their parents'  
8  
9 57 homes, has become an increasingly common living arrangement after parental separation.  
10  
11 58  There is a dearth of empirical studies on child mental health in joint physical custody in the  
12  
13 59 preschool age.  
14

15 60  
16 61 **WHAT THIS STUDY ADDS:**

- 17 62  We found similar mental health in three-year-old children in joint physical custody and  
18  
19 63 intact families, while children living only and mostly with one parent had more mental health  
20  
21 64 problems, net of sociodemographic characteristics.  
22  
23 65  Once we accounted for coparenting quality, child mental health in the diverse living  
24  
25 66 arrangements after parental divorce was very similar.  
26  
27 67  Our results imply that coparenting is of major importance for understanding mental health  
28  
29 68 problems that emerge early in life, and could be targeted with interventions in families with  
30  
31 69 young children.  
32

33 70  
34 71  
35 72  
36  
37  
38  
39  
40  
41  
42  
43  
44  
45  
46  
47  
48  
49  
50  
51  
52  
53  
54  
55  
56  
57  
58  
59  
60

## 73 INTRODUCTION

74 Around 35% of Swedish children experience parental separation before reaching the age of 18  
75 years, and previous studies have shown that the experience of parental separation is associated  
76 with adverse mental health outcomes in the short as well as the long term.(1, 2) During recent  
77 decades, parenting norms have changed in the Nordic countries, and sole custody among  
78 mothers has become less common than joint physical custody (JPC), where children share  
79 their time about equally between their parents' respective homes.(3-5) In Sweden,  
80 approximately 10% of all school children live in JPC arrangements.(3) JPC is also  
81 increasingly common even in countries with more conservative family values such as  
82 Germany and France.(6, 7)

### 84 **Living arrangements and child wellbeing**

85 A growing body of research has shown that living arrangements and contact with both parents  
86 is associated with post-divorce child wellbeing.(8) Most studies in the literature have  
87 suggested that school-aged children and adolescents in JPC fare better on several outcomes  
88 compared to children in single-parent arrangements.(9,10) JPC arrangements among  
89 preschool children has been much less studied. In a recent Swedish study (11), 3- to 5-year-  
90 olds who lived in JPC had fewer mental health problems compared to those living in single-  
91 parent arrangements. Similar findings were reported in a Nordic study on children aged 2-9  
92 years.(12) Studies in contexts outside of the Nordic countries have shown similar but  
93 somewhat more diverse results.(13-15) Pruett, Ebling (14) found that overnight stays with the  
94 second parent were associated with advantages in social functioning and fewer psychological  
95 problems among girls. However, McIntosh and Smyth (13) found that generally the 2- to 3-  
96 year-olds who spent 35% or more time with their second parent, experienced more problems  
97 compared to their peers who has less contact with their second parent. Tornello, Emery (15)  
98 did not find any significant association between custody arrangements in socially and  
99 economically disadvantaged families and psychological problems at age 3, but nonetheless  
100 found fewer problems among 5-year-old children who had JPC versus single-parent  
101 arrangements at age 3.

### 103 **Coparenting quality and child wellbeing**

104 High-quality coparenting has been found to contribute to a positive emotional family climate  
105 and to affect child mental health and social adjustment positively.(16) Children whose parents  
106 work well together in childrearing issues are typically better off during early childhood,

1  
2  
3 107 adolescence and adulthood.(17) The association between coparenting quality and child  
4  
5 108 wellbeing outcomes seems to be stronger than other characteristics of parental relationships,  
6  
7 109 such as intimacy and love.(18) The lower levels of health and wellbeing observed among  
8  
9 110 children with separated parents may thus hypothetically be linked to their parents' ability to  
10  
11 111 amicably share the responsibilities of childrearing.(19) It is important to highlight that  
12  
13 112 coparenting quality is a broader construct than parental conflict. Not only does coparenting  
14  
15 113 include positive measures, it is conceptually distinct from the quality of parental relationships  
16  
17 114 because it directly involves the children.(17)

115

18 116 The aim of this study was to investigate whether mental health in 3-year-old children is  
19  
20 117 associated with their living arrangements after a parental separation, and whether parental  
21  
22 118 coparenting quality moderates this association.

119

## 120 **METHODS**

### 121 **Study population**

122 The population of this study was sampled from a total population of 19,294 children in a  
123 defined geographical area in the Stockholm county, who were invited to a routine visit at the  
124 age of three years by the regional Preventive Child Health Care (PCHC) from December 2015  
125 to May 2018. The PCHC is funded by regional taxes and their services are offered to all  
126 children who reside in the county free of charge. In the invitation letter, parents were  
127 informed about the study and that the survey would be used to individualize the visit at  
128 the PCHC. The letter included a web-link to the survey which was only available in Swedish.  
129 The study was approved by the Regional Ethical Review Board in Stockholm (Dnr 2015-  
130 228631) and parents to children in the PCHC were involved in the piloting phase of this  
131 study.

132

133 In total, 13,493 surveys were submitted. Of these, 112 surveys were excluded because the  
134 participants had reported that they were the sole parent of the child since childbirth and 32  
135 surveys were excluded because parents had completed the survey twice for the same child.  
136 We also excluded 504 surveys because they were completed by someone other than a parent  
137 or because information was missing on main variables of interest. Thus, 12,845 children were  
138 included in the study, equivalent to a participation rate of 66.6% of the total population of 3-  
139 year-olds in the area.

140

## 141 **Patient and Public involvement statement**

142 Parents to children in the child health services in Stockholm were involved in the piloting  
143 phase of this study, where they provided feedback on questionnaires and the procedure in  
144 qualitative interviews and in a quantitative evaluation in writing. We do not plan to have  
145 parents involved in the dissemination of the results of the study.

## 147 **Procedure**

148 The survey included questions on sociodemographic background, children's development,  
149 behaviours and symptoms, parents' worries, and coparenting quality. Parents were  
150 encouraged to complete the survey together.

## 152 **Measures**

153 *Outcome measure.* The main outcome in the study was based on parental report of the  
154 Swedish version of the Strengths and Difficulties Questionnaire (SDQ) which has been  
155 successfully validated for preschool aged children.(20) We used the total sum of scores from  
156 the four symptom subscales (SDQ Total Difficulties) ranging from 0 to 40.

158 *Living arrangements.* Living arrangement groups were based on parents' answers to the  
159 question "What does the child's family look like? The child lives with...". The options were:  
160 (a) intact family, (b) joint physical custody (about 50/50 in each parent's home), (c) living  
161 mostly with mother/father (collapsed here to living mostly with one parent), and (d) living  
162 only with mother/father (collapsed here to living only with one parent).

164 *Coparenting quality.* Coparenting was measured using a four-item scale inspired by the  
165 coparenting scale posited by McHale and Kuersten-Hogan.(21) Parents were asked about their  
166 ability to cooperate, support each other, and confide in/trust each other, and the extent to  
167 which they experienced conflict related to their children. Items were rated on a 5-point scale  
168 from 1 (disagree completely) to 5 (agree completely). Higher scores indicated better  
169 coparenting. The scale showed good internal consistency (Cronbach's alpha = 0.79).  
170 Confirmatory factor analysis revealed an acceptable fit for the one factor model: comparative  
171 fit index (CFI) = 0.99; Tucker-Lewis index (TLI) = 0.98; root mean square error of  
172 approximation (RMSEA) = 0.066 (90% confidence interval = 0.056 – 0.076). For the  
173 ANCOVA analyses, we used a dichotomization where coparenting quality of 15 and below  
174 was considered low while coparenting quality of 16 and above was considered high. Parents

1  
2  
3 175 who had chosen the option 3 (neither agree or disagree) for at least one of the four items were  
4  
5 176 thus dichotomized as reporting low coparenting quality.

6  
7 177

8 178 *Background data on children and parents.* We used the following background characteristics:  
9  
10 179 child gender (girl/boy); responding parent (categorized as mother/father/both, where both  
11  
12 180 included a few cases of same-sex parents); mothers' and fathers' age presented as mean and  
13  
14 181 standard deviations; mothers' and fathers' highest level of education (compulsory/high  
15  
16 182 school/university (less than 3 years)/university (3 years or more)/not reported); and mothers'  
17  
18 183 and fathers' country of birth (grouped as Sweden/other/not reported).

18  
19 184

20 185 *Statistical analyses*

21  
22 186 The scores were scaled up pro-rata for the coparenting scale if only one item was missing, and  
23  
24 187 for SDQ if only one or two items per subscale were missing. Hierarchical regression models  
25  
26 188 were estimated in three steps with the SDQ total score as the outcome, living arrangements as  
27  
28 189 the exposure variable and JPC as reference. Model 1 adjusted for child gender and whether  
29  
30 190 the survey was filled in by the mother, father or both. Model 2 added maternal education. In  
31  
32 191 the fully adjusted Model 3, coparenting quality as a continuous measure was added to Model  
33  
34 192 2. To investigate the possibility that coparenting quality moderated the association between  
35  
36 193 family type and the SDQ total score for children, we used factorial ANCOVA with children's  
37  
38 194 living arrangement and coparenting quality (dichotomized into high and low levels) as factors  
39  
40 195 and child gender, the survey being filled in by the mother and mother's education (at least  
41  
42 196 three years of university education) entered as covariates. Due to small sample sizes the  
43  
44 197 categories of children living mostly or only with one parent were collapsed in the sensitivity  
45  
46 198 analyses.

44  
45 199

## 46 200 **RESULTS**

### 47 201 **Background characteristics**

48  
49 202 Characteristics of children and parents are presented in Table 1. About 95% of the 3-year-olds  
50  
51 203 lived with both parents, in intact families. Children in equal JPC constituted 2.6% of the total  
52  
53 204 sample, while 1.2% of the children lived mostly with one parent and as many lived only with  
54  
55 205 one parent. The sample included slightly more boys than girls in all family types. In intact  
56  
57 206 families, most parents completed the survey together, while in other family types, mothers  
58  
59 207 often completed the survey alone. Separated mothers were slightly younger than those in  
60  
208 intact families and fathers in single care families were younger than fathers in the other family

1  
2  
3 209 types. A university-level education of at least three years was most common for mothers and  
4 210 fathers in intact families and least common in families where the child only lived with one  
5 211 parent. More children to parents born outside of Sweden lived only with one parent compared  
6 212 with JPC. Data on father's educational level as well as on parents' country of birth was  
7 213 missing for a large part of the sample. Low coparenting quality was more common among  
8 214 parents who did not live together and in particular in families where the child only lived with  
9 215 one parent.  
10  
11  
12  
13  
14  
15  
16  
17  
18  
19  
20  
21  
22  
23  
24  
25  
26  
27  
28  
29  
30  
31  
32  
33  
34  
35  
36  
37  
38  
39  
40  
41  
42  
43  
44  
45  
46  
47  
48  
49  
50  
51  
52  
53  
54  
55  
56  
57  
58  
59  
60



Table 1. Characteristics of children and parents in different living arrangements

|                                           | Children's living arrangements |      |               |      |                        |      |                        |      |                      |      |
|-------------------------------------------|--------------------------------|------|---------------|------|------------------------|------|------------------------|------|----------------------|------|
|                                           | Total sample                   |      | Intact family |      | Joint physical custody |      | Mostly with one parent |      | Only with one parent |      |
|                                           | (n=12845)                      |      | (n=12203)     |      | (n=332)                |      | (n=151)                |      | (n=159)              |      |
| <b>Sociodemographic variables</b>         | n                              | %    | n             | %    | n                      | %    | n                      | %    | n                    | %    |
| <b>Child gender</b>                       |                                |      |               |      |                        |      |                        |      |                      |      |
| Girl                                      | 6220                           | 48.1 | 5903          | 48.0 | 163                    | 48.5 | 75                     | 49.7 | 79                   | 49.1 |
| Boy                                       | 6641                           | 51.3 | 6313          | 51.4 | 171                    | 50.9 | 76                     | 50.3 | 81                   | 50.3 |
| Not reported                              | 76                             | 0.6  | 73            | 0.6  | 2                      | 0.6  | 0                      | 0.0  | 1                    | 0.6  |
| <b>Responding parent</b>                  |                                |      |               |      |                        |      |                        |      |                      |      |
| Female (mother)                           | 5342                           | 41.3 | 4873          | 39.7 | 201                    | 59.8 | 126                    | 83.4 | 142                  | 88.2 |
| Male (father)                             | 1058                           | 8.2  | 968           | 7.9  | 73                     | 21.7 | 12                     | 7.9  | 5                    | 3.1  |
| Two parents together <sup>a</sup>         | 6519                           | 50.4 | 6433          | 52.3 | 60                     | 17.9 | 13                     | 8.6  | 13                   | 8.1  |
| Not reported                              | 18                             | 0.1  | 15            | 0.1  | 2                      | 0.6  | 0                      | 0.0  | 1                    | 0.6  |
| <b>Mother age (mean, SD) <sup>b</sup></b> | 35.39                          | 4.66 | 35.47         | 4.58 | 34.18                  | 5.06 | 33.99                  | 6.26 | 32.84                | 6.49 |
| <b>Father age (mean, SD) <sup>c</sup></b> | 37.60                          | 5.48 | 37.64         | 5.46 | 36.05                  | 5.56 | 37.85                  | 4.42 | 33.56                | 9.00 |
| <b>Mother highest level of education</b>  |                                |      |               |      |                        |      |                        |      |                      |      |
| Compulsory                                | 203                            | 1.6  | 168           | 1.4  | 15                     | 4.5  | 7                      | 4.6  | 13                   | 8.2  |
| High school                               | 2751                           | 21.4 | 2528          | 20.7 | 85                     | 25.6 | 65                     | 43.0 | 73                   | 45.9 |
| University less than 3 years              | 1307                           | 10.2 | 1238          | 10.1 | 35                     | 10.5 | 16                     | 10.6 | 18                   | 11.3 |
| University more than 3 years              | 7284                           | 56.7 | 7075          | 58.0 | 115                    | 34.6 | 49                     | 32.5 | 45                   | 28.3 |
| Not reported                              | 1300                           | 10.1 | 1194          | 9.8  | 82                     | 24.7 | 14                     | 9.3  | 10                   | 6.3  |
| <b>Father highest level of education</b>  |                                |      |               |      |                        |      |                        |      |                      |      |
| Compulsory                                | 172                            | 1.3  | 161           | 1.3  | 4                      | 1.2  | 3                      | 2.0  | 4                    | 2.5  |
| High school                               | 2046                           | 15.9 | 1984          | 16.3 | 52                     | 15.7 | 5                      | 3.3  | 5                    | 3.1  |
| University less than 3 years              | 902                            | 7.0  | 879           | 7.2  | 17                     | 5.1  | 6                      | 4.0  | 0                    | 0.0  |
| University more than 3 years              | 4166                           | 32.4 | 4098          | 33.6 | 55                     | 16.6 | 8                      | 5.3  | 5                    | 3.1  |
| Not reported                              | 5559                           | 43.3 | 5081          | 41.6 | 204                    | 61.4 | 129                    | 85.4 | 145                  | 91.2 |
| <b>Mother country of birth</b>            |                                |      |               |      |                        |      |                        |      |                      |      |
| Sweden                                    | 7051                           | 54.9 | 6716          | 55.0 | 171                    | 51.5 | 81                     | 53.6 | 83                   | 52.2 |
| Other                                     | 1440                           | 11.2 | 1383          | 11.3 | 18                     | 5.4  | 13                     | 8.6  | 26                   | 16.4 |
| Not reported                              | 4354                           | 33.9 | 4104          | 33.6 | 143                    | 43.1 | 57                     | 37.7 | 50                   | 31.4 |
| <b>Father country of birth</b>            |                                |      |               |      |                        |      |                        |      |                      |      |
| Sweden                                    | 4484                           | 34.9 | 4374          | 35.8 | 89                     | 26.8 | 14                     | 9.3  | 7                    | 4.4  |
| Other                                     | 872                            | 6.8  | 853           | 7.0  | 9                      | 2.7  | 2                      | 1.3  | 8                    | 5.0  |
| Not reported                              | 7489                           | 58.3 | 6976          | 57.2 | 234                    | 70.5 | 135                    | 89.4 | 144                  | 90.6 |
| <b>Coparenting quality</b>                |                                |      |               |      |                        |      |                        |      |                      |      |
| High                                      | 11314                          | 88.1 | 10972         | 89.9 | 218                    | 65.7 | 70                     | 46.4 | 54                   | 34.0 |
| Low                                       | 1531                           | 11.9 | 1231          | 10.1 | 114                    | 34.3 | 81                     | 53.6 | 105                  | 66.0 |

<sup>a</sup> Includes some same sex parents, <sup>b</sup> n = 9,028, <sup>c</sup> n = 5,697

216

217

218

### 219 **Child mental health in relation to background characteristics**

220 Mental health problems according to SDQ for children in different family types are reported  
 221 in Table 2. Fewer problems were reported for children in intact families followed by children  
 222 in JPC. Children living mostly or only with one parent had more mental health problems.  
 223 Boys had more problems compared with girls and children of mothers with high educational  
 224 levels suffered from less problems compared with those with less educated mothers.

Table 2. Mean values and standard deviations of the SDQ in relation to sociodemographic variables

|                                                 | SDQ Total score |      |      |
|-------------------------------------------------|-----------------|------|------|
|                                                 | <i>n</i>        | Mean | SD   |
| <b><i>Living arrangement</i></b>                |                 |      |      |
| Intact family                                   | 12203           | 7.07 | 4.23 |
| Joint physical custody                          | 332             | 7.26 | 4.50 |
| Mostly with one parent                          | 151             | 8.45 | 5.28 |
| Only with one parent                            | 159             | 8.55 | 5.32 |
| <b><i>Child gender</i></b>                      |                 |      |      |
| Girl                                            | 6213            | 6.70 | 4.10 |
| Boy                                             | 6632            | 7.50 | 4.39 |
| <b><i>Responding parent</i></b>                 |                 |      |      |
| Female (mother)                                 | 5315            | 6.95 | 4.26 |
| Male (father)                                   | 1052            | 7.30 | 4.34 |
| Two parents together <sup>a</sup>               | 6478            | 7.21 | 4.27 |
| <b><i>Mother highest level of education</i></b> |                 |      |      |
| Compulsory                                      | 203             | 8.72 | 5.56 |
| High school                                     | 2751            | 7.67 | 4.53 |
| University less than 3 years                    | 1307            | 7.31 | 4.31 |
| University more than 3 years                    | 7284            | 6.77 | 4.04 |
| Not reported                                    | 1300            | 7.41 | 4.45 |

225 <sup>a</sup> Includes some same sex parents

### 227 **Multivariate modelling**

228 Table 3 shows the results from linear regression models, which suggest, in model 1  
 229 controlling for child gender and respondent parent, that 3-year-olds living mostly or only with  
 230 one parent, compared with those in JPC, had more mental health problems. However, 3-year-  
 231 olds in intact families were not significantly different from those in JPC in terms of mental  
 232 health. When maternal education was added, in Model 2, the differences between those living

233 only and mostly with one parent and those in JPC were attenuated. Coefficients remained  
 234 significant, however, indicating that only some of the differences were explained by the  
 235 background characteristics. In Model 3, after including coparenting quality, the differences  
 236 between those living only and mostly with one parent and in JPC were no longer significant.  
 237 Instead, differences between children in intact families and JPC became significant suggesting  
 238 that children living in JPC showed fewer problems compared to children in intact families  
 239 after controlling for coparenting quality.

Table 3. Linear regression models of parental reports of the SDQ Total Difficulties by living arrangement, sociodemographic variables and coparenting quality (n=12,845)

|                                            | Model 1 |        |      |       | Model 2 |        |      |       | Model 3 |        |       |       |
|--------------------------------------------|---------|--------|------|-------|---------|--------|------|-------|---------|--------|-------|-------|
|                                            | B       | 95% CI |      | p     | B       | 95% CI |      | p     | B       | 95% CI |       | p     |
| <b>Living arrangement</b>                  |         |        |      |       |         |        |      |       |         |        |       |       |
| Joint physical custody                     | Ref     |        |      |       | Ref     |        |      |       | Ref     |        |       |       |
| Intact family                              | -0.26   | -0.72  | 0.21 | 0.283 | -0.11   | -0.58  | 0.36 | 0.643 | 0.70*   | 0.24   | 1.15  | 0.003 |
| Living mostly with one parent              | 1.27*   | 0.45   | 2.09 | 0.002 | 1.18*   | 0.37   | 2.00 | 0.004 | 0.14    | -0.66  | 0.93  | 0.735 |
| Living only with one parent                | 1.38*   | 0.58   | 2.19 | 0.001 | 1.20*   | 0.40   | 2.00 | 0.003 | -0.25   | -1.03  | 0.54  | 0.537 |
| <b>Child gender</b>                        |         |        |      |       |         |        |      |       |         |        |       |       |
| Girl                                       | Ref     |        |      |       | Ref     |        |      |       | Ref     |        |       |       |
| Boy                                        | 0.78*   | 0.64   | 0.93 | 0.000 | 0.78*   | 0.63   | 0.93 | 0.000 | 0.74*   | 0.60   | 0.88  | 0.000 |
| <b>Respondent</b>                          |         |        |      |       |         |        |      |       |         |        |       |       |
| Female (mother)                            | Ref     |        |      |       | Ref     |        |      |       | Ref     |        |       |       |
| Male (father)                              | 0.34*   | 0.06   | 0.62 | 0.019 | -0.37   | -0.96  | 0.22 | 0.220 | -0.38   | -0.95  | 0.20  | 0.199 |
| Two parents together a                     | 0.31*   | 0.16   | 0.47 | 0.000 | 0.37*   | 0.21   | 0.53 | 0.000 | 0.60*   | 0.45   | 0.75  | 0.000 |
| <b>Mother's highest level of education</b> |         |        |      |       |         |        |      |       |         |        |       |       |
| University (3 years or more)               |         |        |      |       | Ref     |        |      |       | Ref     |        |       |       |
| Compulsory                                 |         |        |      |       | 1.92*   | 1.32   | 2.51 | 0.000 | 1.99*   | 1.42   | 2.57  | 0.000 |
| High school                                |         |        |      |       | 0.88*   | 0.69   | 1.07 | 0.000 | 0.80*   | 0.62   | 0.98  | 0.000 |
| University (less than 3 years)             |         |        |      |       | 0.56*   | 0.32   | 0.81 | 0.000 | 0.52*   | 0.28   | 0.76  | 0.000 |
| Not reported                               |         |        |      |       | 1.07*   | 0.53   | 1.60 | 0.000 | 1.06*   | 0.54   | 1.58  | 0.000 |
| <b>Coparenting quality</b>                 |         |        |      |       |         |        |      |       | -0.45*  | -0.48  | -0.42 | 0.000 |

<sup>a</sup> Includes some same sex parents

\*  $P < 0.05$

Figure 1. Estimated marginal means with error bars with 95% confidence intervals for children's living arrangements by coparenting quality.

-----Figure 1 in about here-----

### 250 **Factorial ANCOVA**

251 The factorial ANCOVA analysis revealed a significant interaction effect for children's living  
252 arrangement by coparenting quality  $F(3, 12\ 834) = 3.770, p = 0.010$ . Figure 1 shows the  
253 estimated marginal means for children's living arrangement by coparenting quality. Separate  
254 one-way ANCOVAs on low and high coparenting groups showed that the overall effect of  
255 family type was significant for the high coparenting group ( $F(3, 11\ 307) = 2.83, p = 0.037$ )  
256 and non-significant for the low coparenting group ( $F(3, 1\ 524) = 2.11, p = 0.097$ ). To limit the  
257 number of post-hoc comparisons and in line with our main research question, we only tested  
258 the differences between JPC and other family types. In the high coparenting group, children in  
259 JPC showed fewer problems compared to those living only with one parent (mean difference  
260 = -1.44,  $p = 0.020$ ). No significant differences were found between children living in JPC  
261 families and those in intact families or living mostly with one parent (mean difference = -  
262 0.21, and -1.06,  $p = 0.458$ , and  $0.058$ , respectively).

263  
264 Next, separate one-way ANCOVAs on the four family types showed that high quality  
265 coparenting was associated with fewer mental health problems for children living in intact  
266 and JPC families ( $F(1, 12\ 198) = 435.25, p < 0.001$ , and  $F(1, 327) = 9.40, p = 0.002$ ,  
267 respectively). For children living mostly or only with one parent this difference was smaller  
268 and not statistically significant ( $F(1, 146) = 2.38, p = 0.125$  and  $F(1, 154) = 0.54, p = 0.463$ ,  
269 respectively).

### 271 **Sensitivity analyses**

272 As sensitivity analyses, we used multiple imputation (MI) to impute missing values on SDQ  
273 and coparenting scale (imputed at item level), as well as mother education (compulsory and  
274 high school had to be combined to run the MI). The regression analyses and estimated  
275 marginal means in the ANCOVA model revealed the same pattern of results (not shown).

276  
277 Furthermore, considering that (1) the overall pattern of results was very similar for children  
278 living mostly and only with one parent, and (2) the sample size was smaller in these two  
279 groups, we repeated all the ANOCVA analyses with these two family types grouped together.

280  
281 The factorial ANCOVA analysis revealed a significant interaction effect for children's living  
282 arrangement by coparenting quality  $F(2, 12\ 836) = 5.48, p = 0.004$ . Separate one-way  
283 ANCOVAs on low and high coparenting groups indicated that the overall effect of family

1  
2  
3 284 type was significant for both high and low coparenting groups ( $F(2, 11\ 308) = 4.12, p = 0.016$   
4 and ( $F(2, 1\ 525) = 3.05, p = 0.048$ ). Post-hoc comparisons showed that in the high coparenting  
5 285 group, children in JPC showed similar levels of problems to those living in intact families  
6 286 (mean difference =  $-0.21, p = 0.458$ ), but fewer problems compared to those living  
7 287 mostly/only with one parent (mean difference =  $-1.23, p = 0.008$ ). In the low coparenting  
8 288 group, children in JPC showed fewer problems compared to those living in intact families  
9 289 (mean difference =  $-1.10, p = 0.018$ ), but did not differ significantly from children living  
10 290 mostly/only with one parent (mean difference =  $-0.687, p = 0.222$ ). Separate one-way  
11 291 ANCOVA on children living mostly/only with one parent revealed a non-significant overall  
12 292 effect of the two coparenting levels ( $F(1, 305) = 2.43, p = 0.120$ ).  
13 293  
14 294

## 295 **DISCUSSION**

296 This cross-sectional study of 12,845 3-year-olds in Stockholm, demonstrated very similar  
297 mental health outcomes in children in JPC after parental separation compared with children in  
298 intact families, while children living mostly and only with one parent had more mental health  
299 problems, net of sociodemographic characteristics. These findings are consistent with another  
300 Swedish cohort of 3- to 5-year-olds (11) and studies on older children in the Nordic  
301 countries.(e.g., 12, 22, 23) The addition of coparenting quality in the analyses, however,  
302 changed the picture of how children's mental health is related to family type.  
303

### 304 **The findings in relation to coparenting quality**

305 Coparenting quality varied largely between the different family forms, with intact families  
306 reporting the highest quality and single care parents the lowest. When we adjusted for  
307 coparenting quality the differences in mental health between children in JPC and those living  
308 mostly or only with one parent disappeared. This finding confirms the conclusion of a  
309 systematic review describing coparenting as a key mechanism within the family system for  
310 child mental health outcomes following divorce.(24)  
311

312 Interestingly, the differences between children in intact families and JPC instead became  
313 significant in this analysis, suggesting better mental health in children in JPC. This is  
314 surprising since JPC for young children has been questioned by scientists and child  
315 experts.(25) In the debate the frequent separations from the parents imposed by JPC have  
316 been assumed to harm children's ability to regulate stress and emotions as well as the security  
317 in their attachment relations.(25) A potential explanation for the positive outcome for children

1  
2  
3 318 in JPC may however be the positive prerequisites for parenting involved in this living  
4  
5 319 arrangement, as described by parents of 1-4-year-olds in JPC in an interview study.(26) For  
6  
7 320 young children's mental health, positive parenting practices and high quality in the parent-  
8  
9 321 child relations are particularly important and the interviewed parents described improved  
10  
11 322 parent-child relationships and increased satisfaction in parenting after their divorce.(26, 27)  
12  
13 323 JPC allowed them to focus entirely on the child when together and they could make decision  
14  
15 324 without having to compromise with a coparent. In a previous study of 3-5-year-olds, we found  
16  
17 325 no differences in parent reported child mental health between JPC and intact families but  
18  
19 326 could then not include information on coparenting quality or parental conflict. (11) It is  
20  
21 327 however possible that this finding is an artefact and it needs to be confirmed in future studies.

22  
23 328  
24 329 The interaction analyses revealed significant interaction effects for living arrangement by  
25  
26 330 coparenting quality for both the high and the low coparenting groups when the categories  
27  
28 331 mostly/only with one parent were collapsed. When coparenting quality is high children in JPC  
29  
30 332 and intact families show similar levels of problems and children in JPC have fewer problems  
31  
32 333 compared with those living mostly/only with one parent.

33  
34 334  
35 335 For families with low coparenting quality the results were similar to those of the main  
36  
37 336 analysis; children in JPC showed fewer problems compared to those living in intact families  
38  
39 337 but did not differ significantly from children living mostly/only with one parent. Coparenting  
40  
41 338 quality hence seems to be a determinant of children's mental health not only among children  
42  
43 339 with JPC parents, but may be particularly troublesome in intact families. Obviously fights  
44  
45 340 over the children and lack of support, trust and cooperation in the parental relationship  
46  
47 341 influences the family atmosphere to a higher degree when parents live together, compared  
48  
49 342 with when they have separate homes. Low coparenting quality may also hamper parent's  
50  
51 343 individual relationships to the child and parental efficacy more in intact families. Indeed, prior  
52  
53 344 research has found similar patterns related to parental conflict. In a longitudinal Swedish  
54  
55 345 study, adults who had grown up in intact families characterized by serious disagreement,  
56  
57 346 reported the lowest level of psychological wellbeing, followed by those who had experienced  
58  
59 347 parental conflict and parental divorce. (28) Similarly, another Swedish study found that  
60  
348 children who grew up with divorced parents had poorer psychological health as young adults,  
349 but parental conflict and economic hardship during childhood attenuated the association.(29)

350

1  
2  
3 351 We found high quality coparenting to be associated with fewer mental health problems for  
4 352 children living in intact and JPC families but not for children living mostly or only with one  
5 353 parent. Coparenting quality hence seems to play a lesser role for children when one parent is  
6 354 the primary care giver and the need for cooperation between the parents is limited. Parenting  
7 355 quality of the primary care giver may, for these children, be of greater importance.  
8  
9

10 356  
11  
12 357 We have previously discussed whether children's wellbeing related to custody arrangements  
13 358 may be explained by socioeconomic status, by an increased closeness to the father in JPC, or  
14 359 by whether children experience a loss of social and economic resources. Earlier studies show  
15 360 that although these factors contributed to children's wellbeing, adjusting for them did not  
16 361 eliminate the differences in wellbeing between children living in different family types.(2, 9,  
17 362 11, 12, 23) By exploring the interaction between coparenting quality and family types, we  
18 363 may capture a large proportion of the unmeasured variance; these are differences between  
19 364 groups that have been unexplained in previous studies.  
20  
21  
22  
23  
24  
25  
26  
27  
28

29 366 Currently, parenting interventions mainly focus on improving the quality of parenting  
30 367 children receive and primarily target mothers.(30) Unfortunately, positive effects of such  
31 368 programs have not been extended to coparenting quality.(31) Our results suggest that  
32 369 coparenting skills may be an important and distinct dimension that should be given more  
33 370 attention in parenting interventions and that such programs should be evaluated in terms of  
34 371 their impact on child wellbeing and mental health.(32, 33)  
35  
36  
37  
38  
39  
40

### 41 373 **Methodological considerations**

42 374 Compared to earlier studies examining JPC among very young children, this study has  
43 375 considerable advantages. First, the size of our sample of children in this living arrangement by  
44 376 far exceeds that of earlier studies and enables more detailed groupings. However, in some  
45 377 analyses the smallest groups were collapsed to gain power. Second, these children live in  
46 378 about equal JPC, whereas JPC in other studies may be based on overnights or unequal  
47 379 distribution of time between the parents' homes. Furthermore, the inclusion of the coparenting  
48 380 measure contributes to the explanation of children's psychological health in different family  
49 381 types. We do, however, acknowledge that our assessment of coparenting quality was a  
50 382 modified tool of four items, inspired by McHale et al. (2000). The scale was adapted to a  
51 383 community health care setting where survey items needed to be related to child wellbeing,  
52 384 suitable for discussion with the CHC nurse and possible for parents to complete together as  
53  
54  
55  
56  
57  
58  
59  
60

1  
2  
3 385 well as individually. The four items represent the core dimensions of coparenting as stipulated  
4  
5 386 by McHale and Feinberg.(21,34) Three of the items relate to aspects of the parental  
6  
7 387 relationship that are important for children's feelings of security and cohesion; ability to  
8  
9 388 cooperate, support each other, and confide in/trust each other. The fourth item address  
10  
11 389 parents' conflict over the child, which instead disrupts children's security if it is intense or  
12  
13 390 ongoing.

13 391  
14  
15 392 Another issue with our measure is that we may not capture the whole variance, as most  
16  
17 393 families score rather high on the measure, which may be related to self-serving bias due to the  
18  
19 394 lack of anonymity. Parents who do not wish to discuss their coparenting relationship with the  
20  
21 395 CHC nurse may be inclined to report high coparenting quality while those who are  
22  
23 396 dissatisfied with the relationship instead may tend to score low. Furthermore, it seems quite  
24  
25 397 probable that this tendency, leading to overadjustment, may explain the unexpected better  
26  
27 398 mental health of children in JPC compared with children in intact families. We acknowledge  
28  
29 400 that the measure thus needs further validation. Even so, factor analysis suggested that the  
30  
31 401 internal validity was good. More parents in the intact family settings assessed coparenting  
32  
33 402 quality together, whereas one parent more often assessed coparenting in the non-intact  
34  
35 403 families. To address this issue, we adjusted for whether the respondent was the father or  
36  
37 404 mother or both parents. Finally, we successfully recruited a high percentage of the children in  
38  
39 405 the general population to the study (67%), though we were not able to examine the differences  
40  
41 406 between those who did and did not participate.

41 407 It is important to note that the relation between children's mental health problems and  
42  
43 408 coparenting quality is not causal. Having a toddler with behavioural problems may impact the  
44  
45 409 coparenting relationship and parents' perceptions of their children's mental health may be  
46  
47 410 influenced by their common abilities to handle the child. Further longitudinal studies are  
48  
49 411 needed to determine the direction of this relation. Also, regarding causality, there is no  
50  
51 412 information in this study about what factors lead to better or worse coparenting quality.  
52  
53 413 Sharing parental responsibilities has previously been shown to be associated with reduced  
54  
55 414 workload (35), more time for leisure activities (36), and improved communication between  
56  
57 415 parents.(35, 37)

58 416  
59 417 The results of this study show considerable differences in maternal education between  
60  
418 livingarrangements, with more mothers in intact families having a university degree versus



1  
2  
3 419 separated mothers. There were high numbers of data missing on other potentially important  
4 420 socioeconomic covariates. Socioeconomic as well as other selection factors that were not  
5 421 included in our analysis, such as parent mental health and addictive problems, may hence  
6 422 cause residual confounding in the comparison between family types.  
7  
8  
9

10 423

### 11 424 **Implications**

12 425 This study does not support claims that JPC is psychologically harmful for preschool children  
13 426 in general. Our results rather indicate that the promotion of coparenting quality should be  
14 427 emphasized in policy and prevention of mental health for young children living with both  
15 428 parents as well as after parental separation. For children living mostly or only with one parent,  
16 429 interventions that focus on parenting skills and positive parenting behaviours should be given  
17 430 priority.  
18  
19  
20  
21  
22  
23

24 431

### 25 432 **Conclusion**

26 433 This study shows that 3-year-olds in joint physical custody have better mental health than  
27 434 their counterparts who live mostly or only with one parent and that coparenting quality  
28 435 contributes to the understanding of early child mental health, not only in children with  
29 436 separated parents but also in intact families. Coparenting quality is hence an important health  
30 437 determinant that clinicians and social workers can target with interventions, regardless of the  
31 438 family situation.  
32  
33  
34  
35  
36  
37

38 439

### 39 440 **FUNDING**

40 441 This research was funded by The Wallenberg foundation (AH) and Forte (MB and EF; Dnr  
41 442 2014-0843).  
42  
43  
44

45 443

### 46 444 **CONFLICTS OF INTEREST**

47 445 None declared.  
48  
49

50 446

### 51 447 **CONTRIBUTORS**

52 448 MB, EF and AH initiated and funded this study and created the framework for the data  
53 449 collection and analysis together with KB. KB supervised the data collection and prepared the  
54 450 collected data for analysis. RS designed and performed all statistical analyses and wrote the  
55 451 first draft of the manuscript together with MB. All authors revised the draft and have  
56 452 approved of the final version.  
57  
58  
59  
60

453

**ACKNOWLEDGEMENTS**

Thanks to nurses at the Stockholm well-baby clinics and to the families that participated in this research project.

457

**REFERENCES**

1 Weitoft GR, Hjern A, Haglund B, et al. Mortality, severe morbidity, and injury in children living with single parents in Sweden: a population-based study. *The Lancet* 2003;361(9354):289-95.

2 Bergström M, Fransson E, Modin B, et al. Fifty moves a year: is there an association between joint physical custody and psychosomatic problems in children? *J Epidemiol Community Health* 2015;69(8):769-74.

3 Swedish Government Official Report. 2011:51 Fortsatt föräldrar - om ansvar, ekonomi och samarbete för barnets skull. [Continuous parenthood: about responsibilities, economy and cooperation for the sake of the child]. Statens offentliga utredningar. Stockholm: Fritze; 2011.

4 Kitterød RH, Wiik KA. Shared Residence Among Parents Living Apart in Norway. *Fam Court Rev* 2017;55(4):556-71.

5 Ottosen HM, Stage S. Delebørn i tal. En analyse af skilsmissebørns samvær baseret på SFI's børneforløbsundersøgelse [Split children in numbers. An analysis of divorce child custody cases based on SFI's child development study]. SFI rapport - Det Nationale Forskningscenter for Velfærd; 2012.

6 Institut für Demoskopie Allensbach. Getrennt gemeinsam erziehen Befragung von Trennungseltern im Auftrag des BMFSFJ [Parenting together separately: A survey of separated parents for the BMFSFJ]. Allensbach on Lake Constance: 2017.

7 Institut National de la Statistique et des Études Économiques (INSEE). Structure des familles avec enfants [Structure of families with children]. 2015.

8 Bastaits K, Mortelmans D. Parenting as mediator between post-divorce family structure and children's well-being. *J Child Fam Stud* 2016;25(7):2178-88.

9 Bergström M, Modin B, Fransson E, et al. Living in two homes-a Swedish national survey of wellbeing in 12 and 15 year olds with joint physical custody. *BMC Public Health* 2013;13(1):868.

10 Nielsen L. Shared Physical Custody: Summary of 40 Studies on Outcomes for Children. *J Divorce Remarriage* 2014;55(8):613-35.

- 1  
2  
3 486 11 Bergström M, Fransson E, Fabian H, et al. Preschool children living in joint physical  
4  
5 487 custody arrangements show less psychological symptoms than those living mostly or only  
6  
7 488 with one parent. *Acta Paediatr* 2018;107(2):294-300.
- 8  
9 489 12 Bergström M, Fransson E, Wells MB, et al. Children with two homes: Psychological  
10 490 problems in relation to living arrangements in Nordic 2- to 9-year-olds. *Scand J Public Health*  
11 491 2019;47(2):137-45.
- 12  
13 492 13 McIntosh J, Smyth B, Kelahar M, et al. Post-separation parenting arrangements and  
14 493 developmental outcomes for infants and children. Collected reports. Three reports prepared  
15 494 for the Australian Government Attorney-General's Department, Canberra. 2010.
- 16  
17 495 14 Pruett MK, Ebling R, Insabella G. Critical aspects of parenting plans for young children:  
18 496 Interjecting data into the debate about overnights. *Fam Court Rev* 2004;42(1):39-59.
- 19  
20 497 15 Tornello SL, Emery R, Rowen J, et al. Overnight custody arrangements, attachment, and  
21 498 adjustment among very young children. *J Marriage Fam* 2013;75(4):871-85.
- 22  
23 499 16 Feinberg ME. Coparenting and the Transition to Parenthood: A Framework for Prevention.  
24 500 *Clin Child Fam Psychol Rev* 2002;5(3):173-95.
- 25  
26 501 17 McHale JP, Irace K. Coparenting in diverse family systems. In: McHale JP, Lindahl KM,  
27 502 editors. Coparenting: A conceptual and clinical examination of family systems. Washington,  
28 503 DC, US: American Psychological Association; 2011.
- 29  
30 504 18 Frosch CA, Mangelsdorf SC. Marital behaviour, parenting behaviour, and multiple reports  
31 505 of preschoolers' behaviour problems: Mediation or moderation? *Dev Psychol* 2001;37(4):502-  
32 506 19.
- 33  
34 507 19 Amato PR. The consequences of divorce for adults and children. *J Marriage Fam*  
35 508 2000;62(4):1269-87.
- 36  
37 509 20 Dahlberg A, Ghaderi A, Sarkadi A, et al. SDQ in the hands of fathers and preschool  
38 510 teachers—Psychometric properties in a non-clinical sample of 3–5-year-olds. *Child*  
39 511 *Psychiatry Hum Dev* 2019;50(1):132-41.
- 40  
41 512 21 McHale JP, Kuersten-Hogan R, Lauretti A, et al. Parental reports of coparenting  
42 513 and observed coparenting behaviour during the toddler period. *J Fam Psychol*  
43 514 2000;14(2):220-  
44 515 36.
- 45  
46 516 22 Nilsen SA, Breivik K, Wold B, et al. Divorce and Family Structure in Norway:  
47 517 Associations With Adolescent Mental Health. *J Divorce Remarriage* 2018;59(3):175-94.
- 48  
49 518 23 Bergström M, Fransson E, Hjern A, et al. Mental health in Swedish children  
50  
51  
52  
53  
54  
55  
56  
57  
58  
59  
60

- 1  
2  
3 519 living in joint physical custody and their parents' life satisfaction: A cross-sectional study.  
4  
5 520 *Scand J Psychol* 2014;55(5):433-9.
- 6  
7 521 24 Lamela D, Figueiredo B. Coparenting after marital dissolution and children's mental  
8  
9 522 health: a systematic review. *J Pediatr (Rio J)* 2016;92:331-42.
- 10  
11 523 25 McIntosh J, Smyth BM, Kelaher MA, Lamb ME. Responding to Concerns About a Study  
12  
13 524 of Infant Overnight Care Postseparation, With Comments on Consensus: Reply to Warshak  
14  
15 525 (2014). *Psychology, Public Policy, and Law* 2015;21(1):111–119.
- 16  
17 526 26 Bergström M, Sarkadi A, Hjern A, Fransson E. “We also communicate through a book in  
18  
19 527 the diaper bag”—Separated parents’ ways to coparent and promote adaptation of their 1-4  
20  
21 528 year olds in equal joint physical custody. *PloS One* 2019;14(4), e0214913–e0214913.
- 22  
23 529 27 Renk K, Roddenberry A, Oliveros A, Sieger K. The relationships of maternal  
24  
25 530 characteristics and perceptions of children to children’s emotional and behavioural problems.  
26  
27 531 *Child & Family Behaviour Therapy*. 2017;29, 37–57.
- 28  
29 532 28 Gähler M. Self-reported Psychological Well-being among Adult Children of Divorce in  
30  
31 533 Sweden. *Acta Sociol* 1998;41(2-3):209-25.
- 32  
33 534 29 Gähler M, Garriga A. Has the Association Between Parental Divorce and Young Adults’  
34  
35 535 Psychological Problems Changed Over Time? Evidence From Sweden, 1968-2000. *J Fam*  
36  
37 536 *Issues* 2013;34(6):784-808.
- 38  
39 537 30 Panter-Brick C, Burgess A, Eggerman M, et al. Practitioner review: Engaging fathers –  
40  
41 538 recommendations for a game change in parenting interventions based on a systematic review  
42  
43 539 of the global evidence. *J Child Psychol Psychiatry* 2014;55(11):1187-212.
- 44  
45 540 31 Pinquart M, Teubert D. Effects of parenting education with expectant and new parents:  
46  
47 541 a meta-analysis. *J Fam Psychol* 2010;24(3):316-27.
- 48  
49 542 32 Feinberg ME, Kan ML. Establishing family foundations: intervention effects on  
50  
51 543 coparenting, parent/infant well-being, and parent-child relations. *J Fam Psychol*  
52  
53 544 2008;22(2):253-63.
- 54  
55 545 33 Doss BD, Cicila LN, Hsueh AC, et al. A randomized controlled trial of brief coparenting  
56  
57 546 and relationship interventions during the transition to parenthood. *J Fam Psychol*  
58  
59 547 2014;28(4):483-94.
- 60  
548 34 Feinberg ME. Coparenting and the Transition to Parenthood: A Framework for Prevention.  
549  
550 549 *Clin Child Fam Psychol Rev* 2002;5(3):173–195.
- 551  
552 550 35 Emery RE. Developmental clinical psychology and psychiatry, Vol. 14. Marriage, divorce,  
553  
554 551 and children's adjustment. 2nd ed. Thousand Oaks, CA, US: Sage Publications, Inc.; 1999.

- 1  
2  
3 552 36 Sodermans AK, Botterman S, Havermans N, et al. Involved fathers, liberated mothers?  
4  
5 553 Joint physical custody and the subjective well-being of divorced parents. *Soc Indic Res*  
6  
7 554 2015;122(1):257-77.  
8  
9 555 37 Trinder L. Shared residence: A review of recent research evidence. *Child Fam Law Q*  
10 556 2010;22(4):475-98.  
11 557

Confidential: For Review Only

1  
2  
3  
4  
5  
6  
7  
8  
9  
10  
11  
12  
13  
14  
15  
16  
17  
18  
19  
20  
21  
22  
23  
24  
25  
26  
27  
28  
29  
30  
31  
32  
33  
34  
35  
36  
37  
38  
39  
40  
41  
42  
43  
44  
45  
46  
47  
48  
49  
50  
51  
52  
53  
54  
55  
56  
57  
58  
59  
60

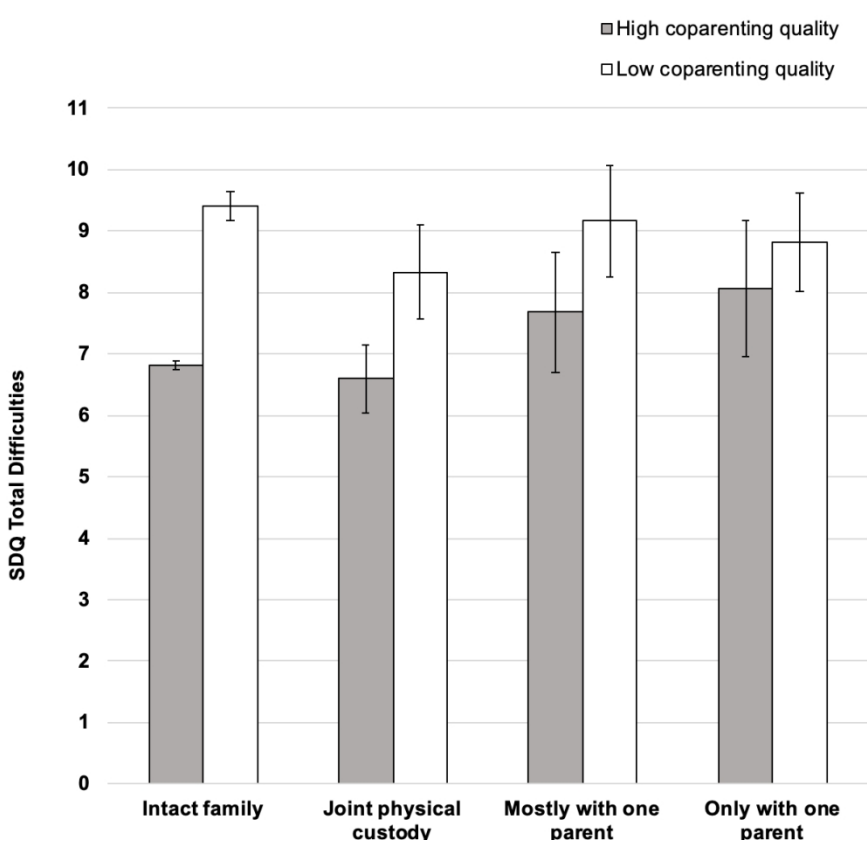

Supplement: bmjpo-2020-000657.draft_revisions.pdf [file bmjpo-2020-000657.draft_revisions.pdf]
